# Supplementary material for: Employment status and the prevalence of poor self-rated health. Findings from UK individual-level repeated cross-sectional data from 1978 to 2004
Source: PubMed Central journal article supplement — BMJ Open. 2012 Dec 4;2(6):e001342. doi: 10.1136/bmjopen-2012-001342 (PMC3533124; doi:10.1136/bmjopen-2012-001342), 2012-12-04
Supplement: bmjopen-2012-001342.draft_revisions.pdf [file bmjopen-2012-001342.draft_revisions.pdf]

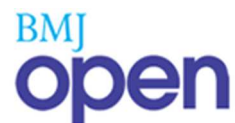

**Are changes in employment status associated with changes in self-rated health? Findings from UK individual level repeat cross-sectional data from 1978 to 2004.**

|                                 |                                                                          |
|---------------------------------|--------------------------------------------------------------------------|
| Journal:                        | <i>BMJ Open</i>                                                          |
| Manuscript ID:                  | bmjopen-2012-001342                                                      |
| Article Type:                   | Research                                                                 |
| Date Submitted by the Author:   | 24-Apr-2012                                                              |
| Complete List of Authors:       | Popham, Frank<br>Bambra, Clare                                           |
| <b>Primary Subject Heading</b>: | Public health                                                            |
| Secondary Subject Heading:      | Sociology                                                                |
| Keywords:                       | employment, unemployment, time-series, self rated health, socio-economic |
|                                 |                                                                          |

SCHOLARONE™  
Manuscripts

Peer review only

1  
2  
3 **Are changes in employment status associated with changes in self-rated health? Findings from UK individual**  
4 **level repeat cross-sectional data from 1978 to 2004.**  
5  
6  
7

8  
9 **Frank Popham<sup>1</sup> and Clare Bambra<sup>2</sup>**  
10

11  
12 <sup>1</sup>MRC/CSO Social and Public Health Sciences Unit

13  
14 4 Lilybank Gardens

15  
16 Glasgow G12 8RZ

17  
18 f.popham@sphsu.mrc.ac.uk  
19

20  
21  
22 Tel: +44 (0) 141 357 3949  
23  
24

25  
26 <sup>2</sup>Department of Geography

27  
28 Wolfson Research Institute

29  
30 Durham University, Queens Campus

31  
32 Stockton on Tees

33  
34 TS17 6BH  
35

36  
37 Word count: 2903

38  
39 Keywords: employment, unemployment, time-series, self rated health, socio-economic  
40  
41  
42  
43  
44  
45  
46  
47  
48  
49  
50  
51  
52  
53  
54  
55  
56  
57  
58  
59  
60

**Abstract**

**Objectives :** To assess how trends in employment status are associated with changes in self rated health year-on-year from 1978 to 2004 as there have been major changes in employment patterns in advanced market democracies and employment is an important determinant of health.

**Design:** Pooled analysis of repeat cross-sectional surveys

**Setting:** UK

**Participants:** 138,932 men and 145,300 women of working age (25 to 59)

**Outcome measure:** Self rated general health

**Results:** Poor health increased amongst both men and women from 1978 to 2004 after accounting for socio-economic changes. However, controlling for the changes in employment status since 1978 attenuated strongly the increase in poor general health. For example, before adjustment the linear trend showed a 6.2 (5.7 to 6.7) and a 4.4 (3.9 to 5) percentage point increase in poor health over the period for men and women respectively but after adjustment this decreased to 1.1 (0.7 to 1.6) and 0.9 (0.3 to 1.4)

**Conclusions:** These results suggest that changes in employment status, particularly the increase in sickness or disability related economic inactivity, in the UK since the late 1970s are strongly associated with a negative trend in poor health. Why this is the case needs further exploration.

**Trial registration:** This observational study was not reregistered.

**Article summary****Article focus**

- There have been major changes in employment (particularly the growth of those out of work sick or disabled) since the 1970s in many OECD countries.
- Given that self rated health is associated strongly with employment status these trends in employment may be associated with trends in population health.

**Key messages**

- Accounting for increases in socio-economic factors associated with good health suggests that self rated health has worsened since 1978 for both working age men and women.
- Much of this worsening can be accounted for by controlling for changes in employment status over time.
- There seems to be an association between rising levels of detachment from the labour market for both men and women and negative trends in poor self rated health.

**Strengths and limitations**

- The study uses consistent individual level data from a long term survey covering a period of socio-economic change
- The reasons for the association are not clear and require further investigation

## Introduction

Since the late 1970s, there have been substantial social, political and economic changes in the UK and in other advanced market democracies. On the one hand, average levels of education and material wealth have increased in the UK since the 1970s [1] and there have been improvements to overall mortality levels and life expectancy. On the other hand, there have been negative trends with increases in inequalities in wealth and health [1, 2]. Welfare provision has decreased [3] at the same time as there have been large reductions in male employment levels and a related rise in male and female (excluding keeping house) economic inactivity rates [4]. The rise of economic inactivity has been linked to the de-industrialisation experienced by the labour markets of advanced market democracies and the associated loss of full-time, permanent, well-paid and skilled industrial jobs [5].

Being out of work has consistently been associated with a heightened risk of mortality [6], mental ill-health and suicide [7, 8], unhappiness [9], poor general health [10] and limiting long term illness [11, 12]. This heightened risk of ill-health applies not just to those unemployed (out of work and actively seeking work) but also to those economically inactive (out of work and not actively seeking work) [9, 10, 13]. Indeed, previous work found that the distribution of economic inactivity was an important factor behind the social gradient in health and in regional differences in health inequalities [10, 14].

Whilst there has been a wealth of research into the association between unemployment and adverse health, there has been much less which examines the health effects of economic inactivity. Arguably, it is the latter which is of increasing importance in public health terms as whilst unemployment is generally cyclical – rising and falling in line with economic contraction and expansion – economic inactivity has increasingly become a structural labour market problem [4]. For example in the UK, according to the 1966 census 94.4% of non-student working age men were in employment and only 3% were economically inactive whilst in the 2001 census, the figures were 80.2% and 14.5% respectively [15]. This paper examines the association of changes in employment status of men and women with changes in the level of poor self-rated health in the UK during the period 1978 to 2004 using individual level data from a repeat cross-sectional survey.

## Methods

The General Household Survey is a UK government repeat cross-sectional household survey that started in 1971 (with gaps in 1997 and 1999). It covers Britain rather than the whole of the UK (so excludes Northern Ireland). Its long running nature means that it is highly suitable for assessing trends over time. The UK's Office for National Statistics (ONS) has produced a consistent (in terms of making variables as comparable as possible over time) time-series of the surveys 1972 to 2004 and it is this individual level dataset - available from the UK Data Archive - that was used in this analysis [16]. Analysis was limited to men and women aged 25 to 59. The lower age limit was chosen to limit the likelihood of people still being in higher education. Although state retirement age in the UK for the study period was 65 for men and 60 for women, it is common practice to restrict analysis to age 59 and below to limit the number of people who have taken voluntary early retirement straight from paid employment.

The health outcome was self-rated general health, with respondents asked "Over the last 12 months, would you say your health has on the whole been: good; fairly good or not good?". For this analysis, it was recoded good and fairly good health (0) versus not good (1) and this latter category is referred to as poor health from now on. The question was first asked in 1977 but the introduction to the question was different in this year so 1978 is taken as the reference year. Employment status was coded as employed, unemployed (out of work but actively seeking work), and the following categories of economic inactivity: retired, in education, keeping house full-time, sick or disabled and other economically inactive. As the time series file only included a single category for economic inactivity we returned to the original annual survey files to compile the more nuanced categories. The retired and in education group were combined for the analysis as the in education group was very small but those in it displayed a similar risk of poor health to those retired.

Single year of age was used in the analysis. Three measures of socio-economic position were used with categories made consistent over time by the ONS, whether the person had a university level degree or not, whether they lived in owned outright housing, owned with mortgage housing, private rented housing or social (state or housing association) rented housing and finally, whether they lived in a household with car access. Across all years, a total of 10% of men and 4% of women in the sample had missing data for one or more of the variables. Using multiple imputation based on all variables already described plus country of residence

1  
2  
3 (England, Wales, Scotland), for men and women separately, five imputed datasets with no missing data were  
4  
5 created for each year separately and pooled and analysed together. The results using the imputed datasets  
6  
7 were very similar to those from the original dataset (analysed excluding cases with any missing data) and the  
8  
9 use of either does not change the conclusions of the study. The results from the multiple imputation analyses  
10  
11 are presented here and the main results from the original complete case analysis are shown in the  
12  
13 supplemental file. The total sample sizes across all years were 138,932 men and 145,300 women. Table 1  
14  
15 includes the individual year sample sizes and response rates.

16  
17  
18 The prevalence of poor health amongst individual respondents in all other years (1979-2004) was compared to  
19  
20 1978 using a logistic regression model containing year dummy variables with standard errors accounting for  
21  
22 the household clustering in the survey (although this was minimal as men and women in the same household  
23  
24 were analysed separately). The initial model (model A) controlled for age as well as socio-economic change in  
25  
26 education, housing tenure and car access as these are variables associated with better general health [17].  
27  
28 Model B then controlled additionally for employment status to assess its impact on the annual differences. To  
29  
30 test the impact of allowing the effect of variables to change over time model A and model B were refitted with  
31  
32 interaction effects included between year and all the other variables. Non-response weights are included in  
33  
34 the time series General Household Survey file from 2000 onwards (when weights were introduced) and these  
35  
36 have been applied in all analysis (weights are scaled to have a mean of 1 in each year) with each individual in  
37  
38 the years prior to 2000 being weighted equally (at 1). As odds ratios across different logistic models are not  
39  
40 directly comparable [18] we also present the results as adjusted prevalence differences (that are comparable  
41  
42 across models [18]) by using the post estimation “margins” command in Stata. This also shows difference on  
43  
44 an absolute scale. Stata 11.2 was used for the analysis.

## 45 46 47 48 **Results**

49  
50 Table 1 shows that for men the rate of poor health was low in 1978 (in 1982 was it lowest) and then increased  
51  
52 to 10.7% in 2004 a rise of 3.2 percentage points over the period while the rate of poor health was lowest for  
53  
54 women in 1984 having declined slightly from 1978, although in the 1990s the rate rose and was just over 1  
55  
56 percentage point higher at the end of period compared to the start. There was clear socio-economic change  
57  
58  
59  
60

over the period with declines in social rented housing and increases in owner occupation, household car access and degree attainment (see Supplemental Figure 1).

Table 1 Response rates, sample sizes and percentage in poor health for men and women by year.

| Year | Response rate* (%) | Number of men | % of men in poor health | Number of women | % of men in poor health |
|------|--------------------|---------------|-------------------------|-----------------|-------------------------|
| 1978 | 82                 | 6845          | 7.5                     | 7072            | 11.5                    |
| 1979 | 83                 | 6626          | 8.1                     | 6823            | 11.3                    |
| 1980 | 82                 | 6704          | 8.8                     | 6904            | 12.3                    |
| 1981 | 84                 | 6953          | 7.8                     | 7117            | 11.4                    |
| 1982 | 84                 | 5817          | 6.9                     | 5983            | 10.3                    |
| 1983 | 82                 | 5607          | 7.5                     | 5811            | 11.5                    |
| 1984 | 81                 | 5420          | 7.6                     | 5583            | 9.6                     |
| 1985 | 82                 | 5617          | 7.3                     | 5747            | 10.5                    |
| 1986 | 84                 | 5703          | 7.5                     | 5873            | 10.3                    |
| 1987 | 85                 | 5804          | 7.4                     | 5966            | 10.7                    |
| 1988 | 85                 | 5586          | 8                       | 5769            | 10.4                    |
| 1989 | 84                 | 5700          | 7.3                     | 5851            | 10                      |
| 1990 | 81                 | 5276          | 7.9                     | 5475            | 11.1                    |
| 1991 | 84                 | 5586          | 7.7                     | 5806            | 10.4                    |
| 1992 | 83                 | 5548          | 8.1                     | 5881            | 10                      |
| 1993 | 82                 | 5381          | 8.1                     | 5660            | 10.9                    |
| 1994 | 80                 | 5394          | 9.5                     | 5658            | 11.3                    |
| 1995 | 80                 | 5400          | 10.3                    | 5770            | 11.5                    |
| 1996 | 76                 | 5104          | 7.9                     | 5400            | 11.5                    |
| 1998 | 72                 | 4666          | 11.1                    | 5049            | 12.4                    |
| 2000 | 67                 | 4393          | 10                      | 4728            | 12.2                    |
| 2001 | 72                 | 4892          | 10.2                    | 5267            | 12.1                    |
| 2002 | 69                 | 4650          | 11.1                    | 5040            | 12.1                    |
| 2003 | 70                 | 5560          | 10                      | 5971            | 12.5                    |
| 2004 | 69                 | 4700          | 10.7                    | 5096            | 12.8                    |

\*Response rates are from <http://www.esds.ac.uk/doc/5640/mrdoc/pdf/5640ghs05appendixb.pdf> (page 10)

Taking these socio-economic changes into account showed greater increases in poor health over time from 1978 (model A table 2 and figures 1 and 2 for men and women respectively). Increases in poor health for men were greater than for women. To summarise the apparent linear trend in poor health we refitted model A with year as a continuous variable and this suggested that for men over the period poor health had increased by 6.2 (5.7 to 6.7) percentage points after accounting for socio-economic change and for women by 4.4 (3.9 to 5) percentage points (see figures 1 and 2). Figure 3 illustrates the changes in non-employment over time with male unemployment (left panel) being cyclical, peaking in the mid 1980s and the early 1990s recession then falling away and being overtaken by those sick or disabled in the late 1990s with this group now being the largest. Other forms of economic inactivity for males showed some increases but remained relatively small groups although those retired or in education had increased to be about 2.5% of the working age male population.



Table 2 Logistic regression results for men and women

|                     | Men (Model A)<br>ORs (95% CIs) | Men (Model B)<br>ORs (95% CIs) | Women (Model A)<br>ORs (95% CIs) | Women (Model B)<br>ORs (95% CIs) |
|---------------------|--------------------------------|--------------------------------|----------------------------------|----------------------------------|
| Age                 | 1.05 (1.05 to 1.05)            | 1.04 (1.04 to 1.04)            | 1.03 (1.03 to 1.04)              | 1.03 (1.02 to 1.03)              |
| Year                |                                |                                |                                  |                                  |
| 1978                | 1                              | 1                              | 1                                | 1                                |
| 1979                | 1.09 (0.96 to 1.25)            | 1.04 (0.91 to 1.2)             | 0.98 (0.88 to 1.1)               | 0.98 (0.87 to 1.09)              |
| 1980                | 1.24 (1.09 to 1.41)            | 1.14 (0.99 to 1.31)            | 1.1 (0.99 to 1.23)               | 1.12 (1 to 1.24)                 |
| 1981                | 1.09 (0.95 to 1.24)            | 0.95 (0.83 to 1.1)             | 1.02 (0.92 to 1.14)              | 1.01 (0.9 to 1.13)               |
| 1982                | 0.99 (0.86 to 1.14)            | 0.8 (0.69 to 0.93)             | 0.93 (0.82 to 1.04)              | 0.9 (0.8 to 1.02)                |
| 1983                | 1.1 (0.96 to 1.27)             | 0.83 (0.71 to 0.96)            | 1.1 (0.98 to 1.23)               | 1.01 (0.9 to 1.14)               |
| 1984                | 1.24 (1.08 to 1.43)            | 0.92 (0.79 to 1.06)            | 0.94 (0.83 to 1.06)              | 0.84 (0.74 to 0.96)              |
| 1985                | 1.18 (1.02 to 1.36)            | 0.83 (0.71 to 0.97)            | 1.05 (0.94 to 1.18)              | 0.93 (0.83 to 1.05)              |
| 1986                | 1.27 (1.1 to 1.46)             | 0.89 (0.77 to 1.03)            | 1.06 (0.94 to 1.19)              | 0.95 (0.85 to 1.08)              |
| 1987                | 1.31 (1.13 to 1.51)            | 0.9 (0.77 to 1.05)             | 1.13 (1 to 1.27)                 | 0.98 (0.87 to 1.11)              |
| 1988                | 1.42 (1.24 to 1.63)            | 0.99 (0.85 to 1.15)            | 1.1 (0.98 to 1.24)               | 0.98 (0.86 to 1.1)               |
| 1989                | 1.32 (1.15 to 1.52)            | 0.84 (0.72 to 0.97)            | 1.08 (0.96 to 1.22)              | 0.94 (0.83 to 1.06)              |
| 1990                | 1.48 (1.28 to 1.72)            | 0.93 (0.79 to 1.09)            | 1.21 (1.08 to 1.36)              | 1.05 (0.93 to 1.18)              |
| 1991                | 1.4 (1.22 to 1.61)             | 0.87 (0.75 to 1.01)            | 1.13 (1.01 to 1.27)              | 0.91 (0.81 to 1.03)              |
| 1992                | 1.51 (1.31 to 1.75)            | 0.85 (0.72 to 1)               | 1.09 (0.97 to 1.23)              | 0.86 (0.76 to 0.97)              |
| 1993                | 1.53 (1.33 to 1.77)            | 0.81 (0.69 to 0.94)            | 1.21 (1.08 to 1.36)              | 0.94 (0.83 to 1.06)              |
| 1994                | 1.85 (1.61 to 2.13)            | 0.99 (0.85 to 1.15)            | 1.27 (1.13 to 1.43)              | 1 (0.89 to 1.13)                 |
| 1995                | 2.07 (1.81 to 2.36)            | 1.09 (0.95 to 1.27)            | 1.34 (1.19 to 1.51)              | 1.02 (0.91 to 1.15)              |
| 1996                | 1.51 (1.31 to 1.75)            | 0.73 (0.62 to 0.86)            | 1.3 (1.15 to 1.47)               | 0.93 (0.81 to 1.06)              |
| 1998                | 2.27 (1.97 to 2.62)            | 1.24 (1.05 to 1.45)            | 1.46 (1.3 to 1.64)               | 1.06 (0.94 to 1.2)               |
| 2000                | 2.04 (1.77 to 2.36)            | 1.04 (0.89 to 1.23)            | 1.45 (1.28 to 1.63)              | 1.09 (0.96 to 1.23)              |
| 2001                | 2.12 (1.85 to 2.44)            | 1.15 (0.98 to 1.34)            | 1.45 (1.29 to 1.63)              | 1.05 (0.92 to 1.19)              |
| 2002                | 2.25 (1.97 to 2.58)            | 1.32 (1.14 to 1.53)            | 1.44 (1.28 to 1.62)              | 1.08 (0.95 to 1.22)              |
| 2003                | 2.01 (1.75 to 2.31)            | 1.1 (0.95 to 1.28)             | 1.48 (1.32 to 1.67)              | 1.11 (0.98 to 1.27)              |
| 2004                | 2.11 (1.83 to 2.43)            | 1.15 (0.98 to 1.35)            | 1.54 (1.37 to 1.73)              | 1.17 (1.03 to 1.33)              |
| No degree           | 1                              | 1                              |                                  | 1                                |
| Degree              | 0.5 (0.46 to 0.54)             | 0.6 (0.55 to 0.65)             | 0.56 (0.51 to 0.61)              | 0.66 (0.6 to 0.72)               |
| Owned outright      | 1                              | 1                              | 1                                | 1                                |
| Owned with mortgage | 0.72 (0.68 to 0.77)            | 0.95 (0.89 to 1.01)            | 0.96 (0.91 to 1.01)              | 1.09 (1.03 to 1.15)              |
| Private rent        | 1.12 (1.02 to 1.22)            | 1.17 (1.07 to 1.29)            | 1.29 (1.19 to 1.39)              | 1.28 (1.18 to 1.39)              |
| Social rent         | 1.82 (1.71 to 1.94)            | 1.46 (1.35 to 1.57)            | 1.95 (1.85 to 2.07)              | 1.72 (1.62 to 1.82)              |
| No car              | 1                              | 1                              | 1                                | 1                                |
| Car                 | 0.53 (0.51 to 0.56)            | 0.85 (0.8 to 0.91)             | 0.6 (0.58 to 0.63)               | 0.73 (0.7 to 0.76)               |

|    |                  |                     |                     |
|----|------------------|---------------------|---------------------|
| 1  |                  |                     |                     |
| 2  |                  |                     |                     |
| 3  | Employed         | 1                   | 1                   |
| 4  | Unemployed       | 2.03 (1.88 to 2.2)  | 1.8 (1.64 to 1.97)  |
| 5  | Keeping house    | 2.64 (2.17 to 3.23) | 1.81 (1.73 to 1.88) |
| 6  | Sick or disabled | 27.93 (25.93 to     | 19.86 (18.33 to     |
| 7  |                  | 30.09)              | 21.52)              |
| 8  | Retired or in    | 2.4 (2.08 to 2.76)  | 1.92 (1.72 to 2.14) |
| 9  | education        |                     |                     |
| 10 | Other inactive   | 6.47 (5.63 to 7.45) | 4.17 (3.52 to 4.94) |
| 11 |                  |                     |                     |
| 12 |                  |                     |                     |
| 13 |                  |                     |                     |
| 14 |                  |                     |                     |
| 15 |                  |                     |                     |
| 16 |                  |                     |                     |
| 17 |                  |                     |                     |
| 18 |                  |                     |                     |
| 19 |                  |                     |                     |
| 20 |                  |                     |                     |
| 21 |                  |                     |                     |
| 22 |                  |                     |                     |
| 23 |                  |                     |                     |
| 24 |                  |                     |                     |
| 25 |                  |                     |                     |
| 26 |                  |                     |                     |
| 27 |                  |                     |                     |
| 28 |                  |                     |                     |
| 29 |                  |                     |                     |
| 30 |                  |                     |                     |
| 31 |                  |                     |                     |
| 32 |                  |                     |                     |
| 33 |                  |                     |                     |
| 34 |                  |                     |                     |
| 35 |                  |                     |                     |
| 36 |                  |                     |                     |
| 37 |                  |                     |                     |
| 38 |                  |                     |                     |
| 39 |                  |                     |                     |
| 40 |                  |                     |                     |
| 41 |                  |                     |                     |
| 42 |                  |                     |                     |
| 43 |                  |                     |                     |
| 44 |                  |                     |                     |
| 45 |                  |                     |                     |
| 46 |                  |                     |                     |
| 47 |                  |                     |                     |
| 48 |                  |                     |                     |
| 49 |                  |                     |                     |
| 50 |                  |                     |                     |
| 51 |                  |                     |                     |
| 52 |                  |                     |                     |
| 53 |                  |                     |                     |
| 54 |                  |                     |                     |
| 55 |                  |                     |                     |
| 56 |                  |                     |                     |
| 57 |                  |                     |                     |
| 58 |                  |                     |                     |
| 59 |                  |                     |                     |
| 60 |                  |                     |                     |

Overall male employment had fallen from 93% to 86% at the end of the period. For women, figure 3 (right panel) shows (reading the right hand axis) that there had been a 20 percentage point decline in those keeping home but, as for men, cyclical unemployment, a rise in those sick or disabled overtaking those unemployed and a rise in those retired or in education. However unlike men, female employment rose by 13 percentage points over the period from 61% to 74%. All forms of non employment were associated with an alleviated probability of poor health but those sick or disabled had a particularly strong association. Controlling for employment status changes (model B in table 2 and figures 1 and 2) attenuated the increases in poor health from 1978 dramatically for men and women with now a decrease in poor health up until the late 1990s and a slight increase thereafter. The linear trend after controlling for employment status changes was now only a 1.1 (0.7 to 1.6) and 0.9 (0.3 to 1.4) percentage point increase in poor health over the period for men and women respectively. The right hand panel for Figures 1 and 2 shows that the impact of including interaction terms with year on the results from models A and B was minimal as they were very similar to those derived from the no interaction models shown in the left hand panel. The results were very similar for the complete case analysis (see supplemental figures 2 and 3). Pseudo r<sup>2</sup> statistics (taken from the complete case analysis as not returned in the multiple imputed analysis) indicated that controlling for employment status in model B improved model fit from model A (for men from 0.09 to 0.22, for women from 0.05 to 0.13).

## Discussion

The individual level analysis presented here shows that changes in employment patterns – most notably the rise of sickness or disability related economic inactivity - are associated with an increased prevalence of poor self-rated health in the UK population since the late 1970s. This complements previous research into sickness or disability related economic inactivity which found that it was a possible major factor behind the social gradient in health [14] as well as an influential issue in regional differences in health [10]. It also suggests that understanding why changes in employment status are associated with changes in self-rated health could be important for public health.

The relationship between employment status and health is complicated. Many of the economically inactive in this study classified themselves as sick or disabled who had a very high probability of reporting poor health and who increased in size as a group over time. Evidence from UK labour market studies suggest that the increases in the economically inactive population (particularly those claiming sickness related benefits) in the 1980s and 1990s were a form of “hidden unemployment” [5]. This suggests that in better labour market conditions they would be in-work or actively seeking work. Indeed, in better labour markets it is argued that there is “hidden sickness” amongst the active workforce [5]. This does not necessarily require any change in the individual level of ill-health in the population just change in the proportion of people who are employed. There is strong evidence that such a process has occurred from the early 1980s for men in the UK and a related one for women started slightly later [19]. Recent theoretical work on how people self-rate their general health suggests a cognitive process where people take account of their individual health situation but do so in the wider context in which they live [20]. Hence the assessment of one’s health while being economically inactive may differ compared to when one is in or seeking work. Coupled to the health damaging psychological and material consequences of non-work [21] this may allow us to understand why economic inactivity may be associated with a higher risk of poor general health.

Of course, confounding and reverse causality are real possibilities within this repeat cross-sectional study design. For example, there could be other confounding or mediating trends that are associated with both general health and employment that could explain the impact of adjusting for changes in employment status. Examples include the apparent decline in job quality over time [22] and macro-economic changes such as the rise in the level of income inequality. Moreover, it is recognised that poor health can precede job loss, so

1  
2  
3 there is the possibility that health selection or reverse causality is a factor in our research [23]. This would lead  
4  
5 to the conclusion that rising rates of poor general health have increased economic inactivity. For general  
6  
7 health, there is evidence of both health selection [23] but also causation [24]. The debate over the relative  
8  
9 influence of employment on health versus health on employment is limited though because it tends to  
10  
11 emphasise notions of people being in a state of health that either allows them to work or not: a zero-sum  
12  
13 approach. Yet, it should be remembered that ill health for the majority is not an impediment to labour market  
14  
15 participation [25] but that those in ill-health - particularly in lower status jobs - are most vulnerable to job loss  
16  
17 and were increasingly so in the period under study [25] . So their job loss may not then be caused by their ill-  
18  
19 health per se but by the prevailing labour market condition and the policy response to this [26, 27] and it is  
20  
21 perhaps these that should be focussed on more. It will be useful to test the existence of similar trends in other  
22  
23 countries.

24  
25  
26 Economic inactivity is also an important influence on population health, not just because of the composition of  
27  
28 the inactive population itself, but also because it is generally a longer term state. For example, a recent cohort  
29  
30 study of people out of work and in receipt of incapacity-related benefits in the UK found that the average  
31  
32 length of economic inactivity amongst this group was nine years [28]. Thus the issues which are usually put  
33  
34 forward to explain the association between unemployment and ill health – most notably poverty, social  
35  
36 exclusion and low social status – are thus experienced for a much longer time period by those who are inactive  
37  
38 than by those who are unemployed.

39  
40  
41  
42 Whilst our results suggest that decreasing the numbers of economically inactive would have health benefits,  
43  
44 this is by no means an easy task and not just because of the current economic climate. Research into welfare  
45  
46 to work interventions for those with a disability or chronic illness has found that even in times of solid  
47  
48 economic growth it is very difficult to increase the employment rate of this group. For example, in the UK since  
49  
50 the 1990s there have been increasing efforts to enhance the labour market participation of this group using  
51  
52 various interventions including education, training and work placement schemes; vocational advice and  
53  
54 support services; vocational rehabilitation; in-work benefits; financial incentives for employers; employment  
55  
56 rights legislation and accessibility interventions[4]. However, the evidence of effectiveness in terms of actually  
57  
58 increasing employment is very limited [4, 29-31]. This is partly attributed to the largely supply-side orientation  
59  
60

1  
2  
3 of most of the interventions [4], the focus on employment rather than health improvement [28, 32] and the  
4 lack of demand from employers for workers with complicated and fluctuating health conditions [28]. From a  
5 different perspective of course, it can be argued that economic inactivity is structural unemployment and that  
6 a far more radical overhaul of the economic system would be required before full employment – and possible  
7 associated population health benefits - is achieved again in the advanced market democracies.  
8

9  
10  
11 In addition to being only cross-sectional, another limitation of using the General Household Survey is that  
12 response rate fell over time; weighting was introduced in 2000 and we have applied this in all analysis but the  
13 possibility remains that the survey became increasingly unrepresentative over time. It is impossible to assess  
14 the impact of this on our results as we do not have details of non responders. However, evidence comparing a  
15 national census to a national health survey suggested that low socio-economic groups and the out of work  
16 were less well represented in the survey leading to a more conservative estimate of the social gradient in  
17 health in the survey [33].  
18  
19  
20  
21  
22  
23  
24  
25  
26  
27

## 28 **Conclusion**

29  
30 To summarise, this study shows that poor health increased amongst both men and women from 1978 to 2004  
31 when accounting for socio-economic changes. However, controlling for the employment status changes in the  
32 UK since 1978 attenuated the increase in poor general health. This research raises important public policy  
33 issues around the role of employment in overall public health which should be examined further.  
34  
35  
36  
37

## 38 **Acknowledgements**

39  
40 General Household Survey Time Series Dataset 1972-2004 was created by the Office for National Statistics. The  
41 user guide for the time series dataset was created jointly by ONS and the Economic and Social Data Service  
42 (ESDS) Government and downloaded from the UK Data Archive. The data are Crown copyright. The authors  
43 alone are responsible for the analysis and interpretation.  
44  
45  
46  
47

## 48 **Funding**

49  
50 No specific grant was associated with this was work. FP is funded by the MRC (5TK10).  
51  
52

## 53 **Ethics approval**

54  
55 Not required for this secondary analysis of publically available and anonymised secondary data  
56  
57  
58  
59  
60

### Author contributions

FP had the original idea which was developed with CB. FP conducted the analysis and drafted the manuscript with revisions from CB.

### References

- 1 Dorling D, Rees P. A nation still dividing: the British census and social polarisation 1971 - 2001. *Environ Plan A* 2003;**35**:1287-313.
- 2 Thomas B, Dorling D, Davey Smith G. Inequalities in premature mortality in Britain: observational study from 1921 to 2007. *BMJ* 2010;**341**:c3639.
- 3 Eikemo TA, Bambra C. The welfare state: a glossary for public health. *J Epidemiol Community Health* 2008;**62**:3-6.
- 4 Bambra C. *Work, Worklessness, and the Political Economy of Health*. Oxford: Oxford University Press 2011.
- 5 Beatty C. A Theory of Employment, Unemployment and Sickness. *Reg Stud* 2000;**34**:617-30.
- 6 Roelfs DJ, Shor E, Davidson KW, et al. Losing life and livelihood: A systematic review and meta-analysis of unemployment and all-cause mortality. *Soc Sci Med* 2011;**72**:840-54.
- 7 Paul KI, Moser K. Unemployment impairs mental health: Meta-analyses. *J Vocat Behav* 2009;**74**:264-82.
- 8 Welch SS. A review of the literature on the epidemiology of parasuicide in the general population. *Psychiatr Serv* 2001;**52**:368.
- 9 Blanchflower D, Oswald A. International Happiness. *The Academy of Management Perspectives (formerly The Academy of Management Executive) (AMP)* 2011;**25**:6-22.
- 10 Bambra C, Popham F. Worklessness and regional differences in the social gradient in general health: Evidence from the 2001 English census. *Health Place* 2010;**16**:1014-21.
- 11 Bartley M, Plewis I. Accumulated labour market disadvantage and limiting long-term illness: data from the 1971-1991 Office for National Statistics' Longitudinal Study. *Int J Epidemiol* 2002;**31**:336-41.
- 12 Korpi T. Accumulating Disadvantage. Longitudinal Analyses of Unemployment and Physical Health in Representative Samples of the Swedish Population. *Eur Sociol Rev* 2001;**17**:255-73.
- 13 Clemens T, Boyle P, Popham F. Unemployment, mortality and the problem of health-related selection: evidence from the Scottish and England & Wales (ONS) longitudinal studies. *Health Stat Q* 2009:7-13.
- 14 Popham F, Bambra C. Evidence from the 2001 English Census on the contribution of employment status to the social gradient in self-rated health. *J Epidemiol Community Health* 2010;**64**:277-80.
- 15 MacKay RR, Davies L. Unemployment, permanent sickness, and nonwork in the United Kingdom. *Environ Plan A* 2007;**40**:464-81.
- 16 User Guide for the General Household Survey (GHS) Time Series Dataset 1972 to 2004 (suitable for pseudo-cohort analysis)  
[http://www.esds.ac.uk/doc/5664%5Cmrdoc%5Cpdf%5C5664\\_ghs\\_time\\_series\\_user\\_guide.pdf](http://www.esds.ac.uk/doc/5664%5Cmrdoc%5Cpdf%5C5664_ghs_time_series_user_guide.pdf)
- 17 Macintyre S, McKay L, Der G, et al. Socio-economic position and health: what you observe depends on how you measure it. *Journal of Public Health* 2003;**25**:288-94.
- 18 Mood C. Logistic Regression: Why We Cannot Do What We Think We Can Do, and What We Can Do About It. *Eur Sociol Rev* 2010;**26**:67-82.
- 19 Beatty C, Fothergill S, Houston D, et al. A gendered theory of employment, unemployment, and sickness. *Environ Plan C* 2009;**27**:958-74.
- 20 Jylhä M. What is self-rated health and why does it predict mortality? Towards a unified conceptual model. *SocSci Med* 2009;**69**:307-16.
- 21 Bartley M, Ferrie J, Montgomery SM. Health and labour market disadvantage: unemployment, non-employment, and job insecurity. In: Marmot M, Wilkinson RG, eds. *Social determinants of health*. Oxford: Oxford University Press 2006:78-96.

- 1  
2  
3 22 Clark AE. Your Money or Your Life: Changing Job Quality in OECD Countries. *Br J Ind Relat*  
4 2005;**43**:377-400.
- 5 23 Ki M, Sacker A, Kelly Y, *et al.* Health selection operating between classes and across employment  
6 statuses. *J Epidemiol Community Health* 2011;**65**:1132-9.
- 7 24 Sacker A, Wiggins RD, Bartley M, *et al.* Self-Rated Health Trajectories in the United States and the  
8 United Kingdom: A Comparative Study. *Am J Public Health* 2007;**97**:812-8.
- 9 25 Bartley M, Owen C. Relation between socioeconomic status, employment, and health during  
10 economic change, 1973-93. *BMJ* 1996;**313**:445-9.
- 11 26 Holland P, Burström B, Whitehead M, *et al.* How Do Macro-Level Contexts and Policies Affect the  
12 Employment Chances of Chronically Ill and Disabled People? Part I: The Impact of Recession and  
13 Deindustrialization. *Int J Health Serv* 2011;**41**:395-413.
- 14 27 Holland P, Nylén L, Thielen K, *et al.* How Do Macro-Level Contexts and Policies Affect the Employment  
15 Chances of Chronically Ill and Disabled People? Part II: The Impact of Active and Passive Labor Market Policies.  
16 *Int J Health Serv* 2011;**41**:415-30.
- 17 28 Warren J, Garthwaite K, Bamba C. 'A health problem? Health and employability in the UK labour  
18 market'. In: Houston D, Lindsay C, eds. *Disability Benefits and Employment Policy: Fit for Work? Fit for Purpose?*  
19 London: Palgrave in press.
- 20 29 Clayton S, Bamba C, Gosling R, *et al.* Assembling the evidence jigsaw: insights from a systematic  
21 review of UK studies of individual-focused return to work initiatives for disabled and long-term ill people. *BMC*  
22 *Public Health* 2011;**11**:170.
- 23 30 Bamba C, Whitehead M, Hamilton V. Does 'welfare-to-work' work? A systematic review of the  
24 effectiveness of the UK's welfare-to-work programmes for people with a disability or chronic illness. *Soc Sci*  
25 *Med* 2005;**60**:1905-18.
- 26 31 Barr B, Clayton S, Whitehead M, *et al.* To what extent have relaxed eligibility requirements and  
27 increased generosity of disability benefits acted as disincentives for employment? A systematic review of  
28 evidence from countries with well-developed welfare systems. *J Epidemiol Community Health* 2010;**64**:1106-  
29 14.
- 30 32 Bamba C. Doctors are key to welfare reform. *BMJ* 2010;**341**.
- 31 33 Lorant V, Demarest S, Miermans PJ, *et al.* Survey error in measuring socio-economic risk factors of  
32 health status: a comparison of a survey and a census. *Int J Epidemiol* 2007;**36**:1292-9.
- 33  
34  
35  
36  
37  
38  
39  
40  
41  
42  
43  
44  
45  
46  
47  
48  
49  
50  
51  
52  
53  
54  
55  
56  
57  
58  
59  
60

1  
2  
3  
4  
5  
6  
7  
8  
9  
10  
11  
12  
13  
14  
15  
16  
17  
18  
19  
20  
21  
22  
23  
24  
25  
26  
27  
28  
29  
30  
31  
32  
33  
34  
35  
36  
37  
38  
39  
40  
41  
42  
43  
44  
45  
46  
47  
48  
49  
50  
51  
52  
53  
54  
55  
56  
57  
58  
59  
60

Figure 1– Prevalence difference for men from model A (before adjustment for employment status) and model B (after adjustment) with year fitted as a series of dummies as and as a continuous trend variable. The left hand panel is from models with no interaction terms and the right from models with full interaction.

Figure 2– Prevalence difference for women from model A (before adjustment for employment status) and model B (after adjustment) with year fitted as a series of dummies as and as a continuous trend variable. The left hand panel is from models with no interaction terms and the right from models with full interaction.

Figure 3 Changes over time in non employment for men and women.

For peer review only



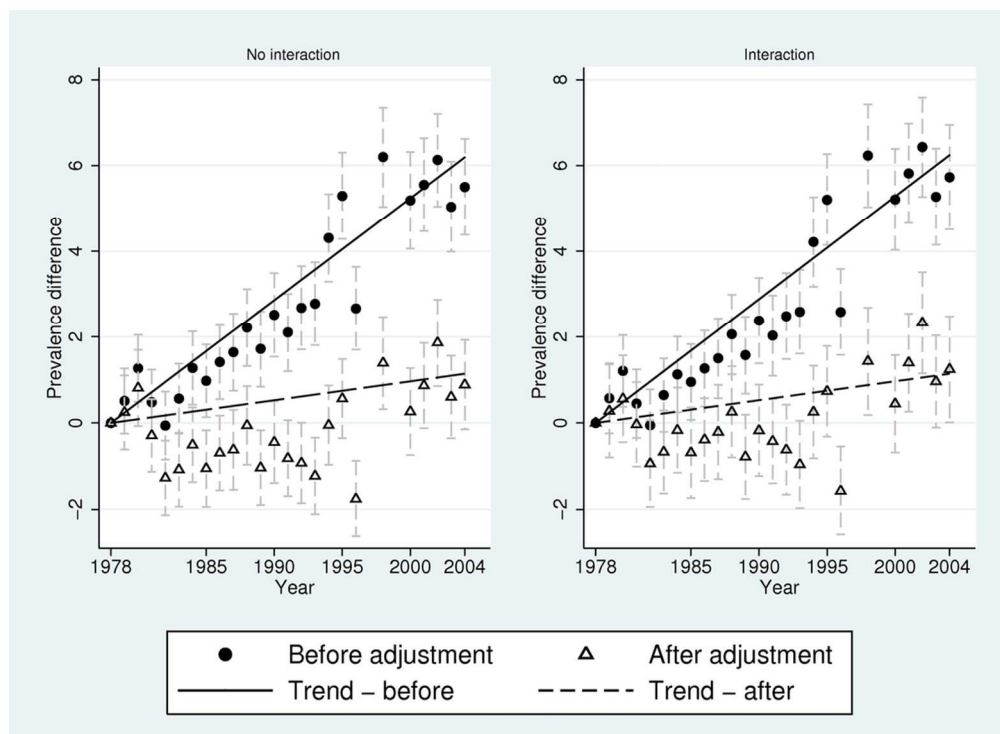

Figure 1- Prevalence difference for men from model A (before adjustment for employment status) and model B (after adjustment) with year fitted as a series of dummies as and as a continuous trend variable. The left hand panel is from models with no interaction terms and the right from models with full interaction. 101x73mm (300 x 300 DPI)

ew only

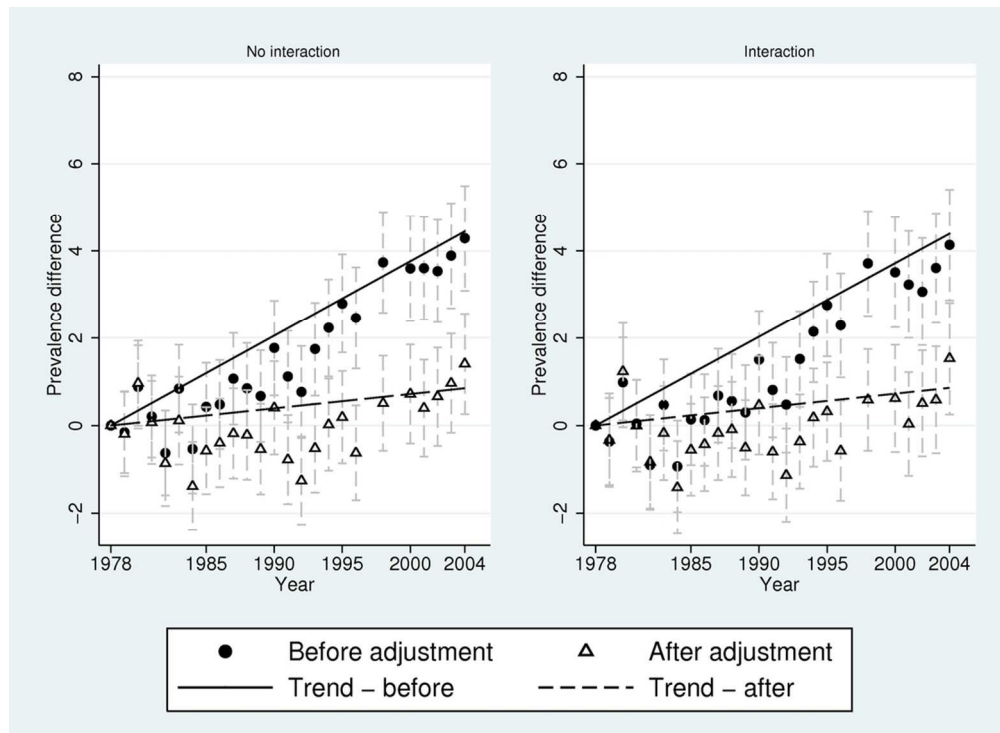

Figure 2- Prevalence difference for women from model A (before adjustment for employment status) and model B (after adjustment) with year fitted as a series of dummies as and as a continuous trend variable. The left hand panel is from models with no interaction terms and the right from models with full interaction.  
101x73mm (300 x 300 DPI)

ew only

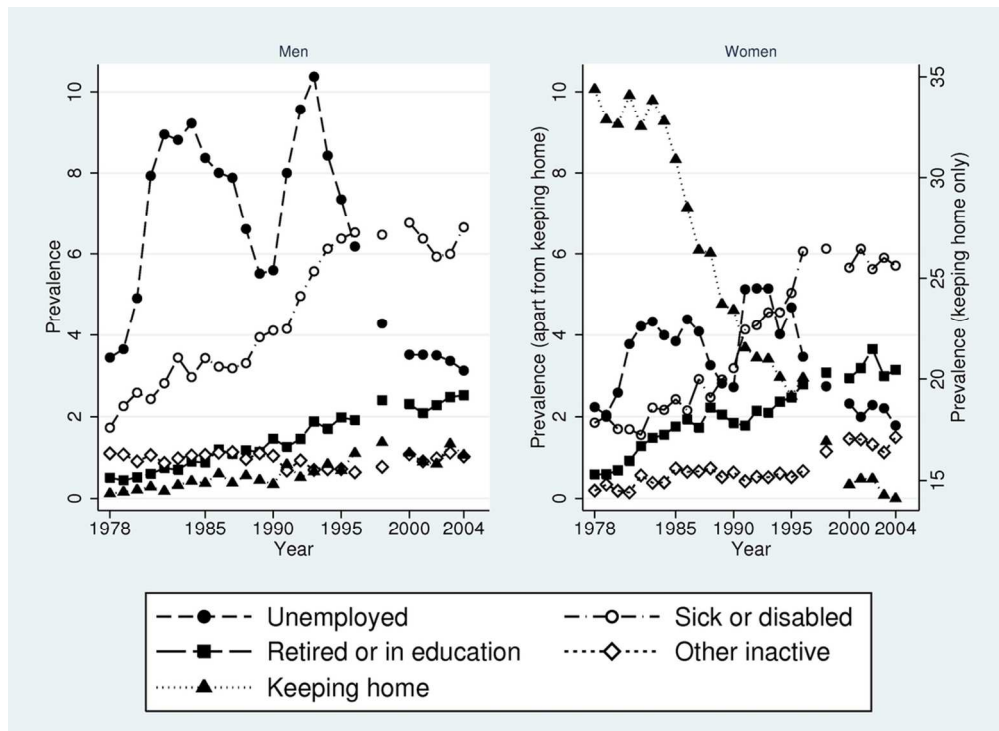

Figure 3 Changes over time in non employment for men and women.  
101x73mm (300 x 300 DPI)

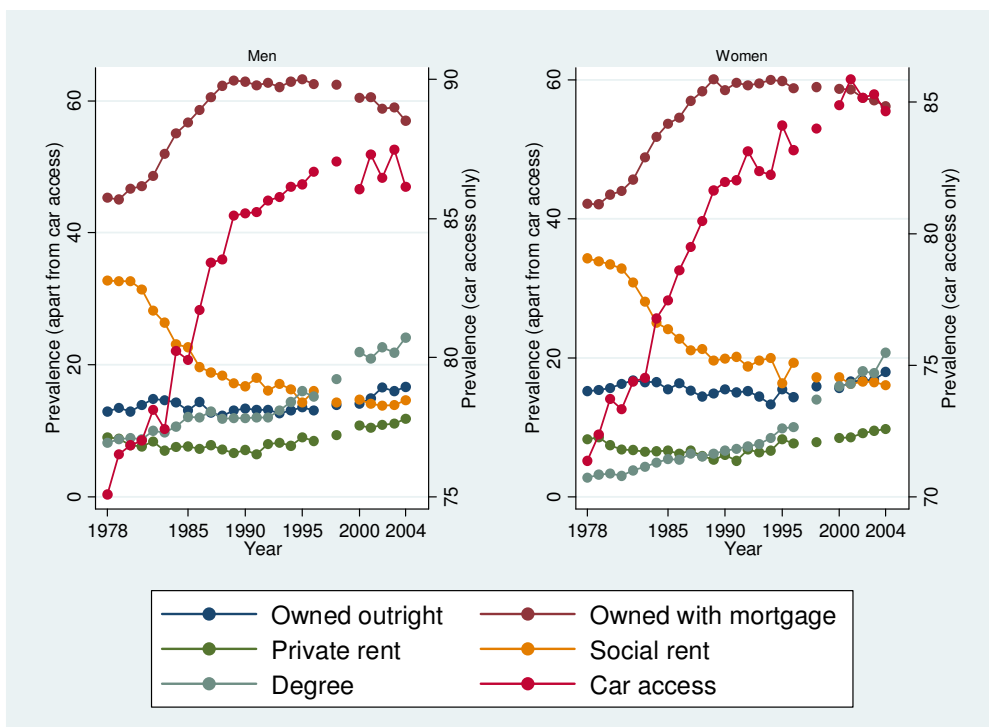

Supplemental figure 1 – Socio-economic changes over the period

review only

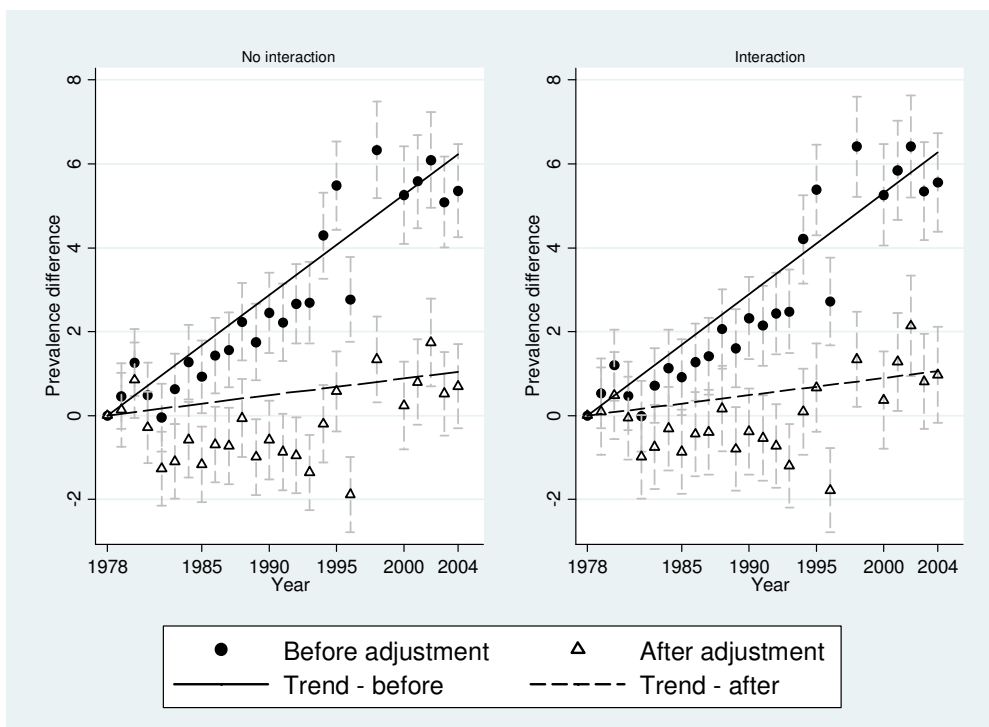

Supplemental figure 2– Prevalence difference for men from model A (before adjustment for employment status) and model B (after adjustment) with year fitted as a series of dummies as and as a continuous trend variable. The left hand panel is from models with no interaction terms and the right from models with full interaction. From complete case analysis.

Review only

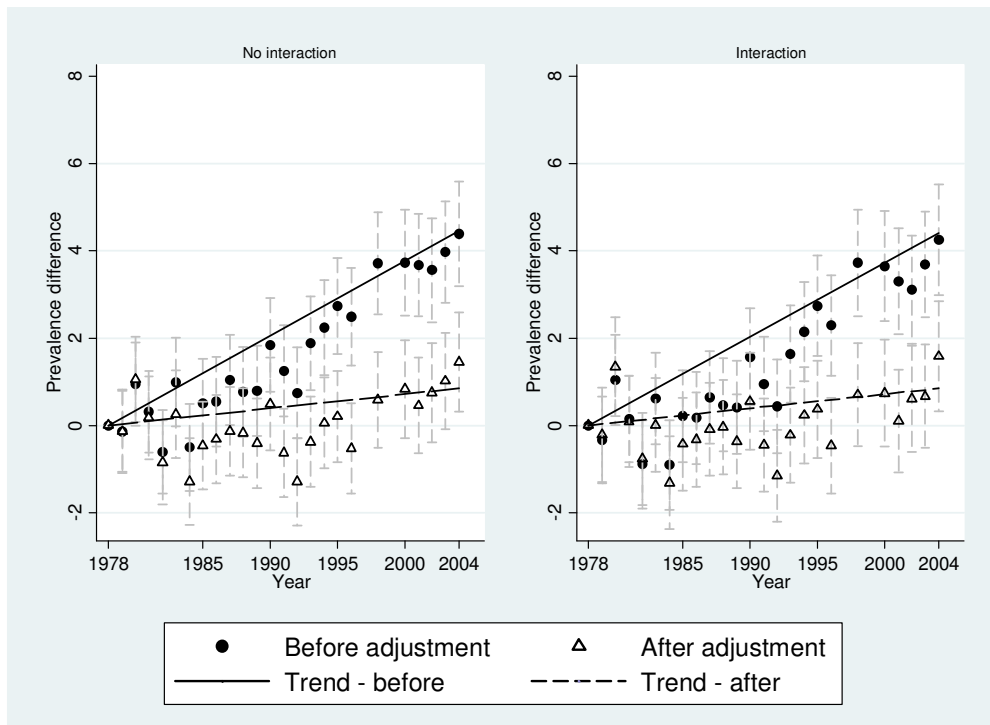

Supplemental figure 3— Prevalence difference for women from model A (before adjustment for employment status) and model B (after adjustment) with year fitted as a series of dummies as and as a continuous trend variable. The left hand panel is from models with no interaction terms and the right from models with full interaction. From complete case analysis.



**The potential impact of employment status changes on the prevalence of poor self rated health. Findings from UK individual level repeated cross-sectional data from 1978 to 2004**

|                                 |                                                                                  |
|---------------------------------|----------------------------------------------------------------------------------|
| Journal:                        | <i>BMJ Open</i>                                                                  |
| Manuscript ID:                  | bmjopen-2012-001342.R1                                                           |
| Article Type:                   | Research                                                                         |
| Date Submitted by the Author:   | 20-Aug-2012                                                                      |
| Complete List of Authors:       | Popham, Frank<br>Gray, Lindsay<br>Bambra, Clare                                  |
| <b>Primary Subject Heading</b>: | Public health                                                                    |
| Secondary Subject Heading:      | Sociology                                                                        |
| Keywords:                       | employment, unemployment, economic inactivity, self rated health, socio-economic |
|                                 |                                                                                  |

SCHOLARONE™  
Manuscripts

1  
2  
3 **The potential impact of employment status changes on the prevalence of poor self rated health. Findings**  
4 **from UK individual level repeated cross-sectional data from 1978 to 2004.**  
5  
6  
7

8  
9 **Frank Popham<sup>1</sup> Linsay Gray<sup>1</sup> and Clare Bamba<sup>2</sup>**  
10

11  
12 <sup>1</sup>MRC/CSO Social and Public Health Sciences Unit

13  
14 4 Lilybank Gardens

15  
16 Glasgow G12 8RZ

17  
18 f.popham@sphsu.mrc.ac.uk  
19

20  
21  
22 Tel: +44 (0) 141 357 3949  
23  
24

25  
26 <sup>2</sup>Department of Geography

27  
28 Wolfson Research Institute

29  
30 Durham University, Queens Campus

31  
32 Stockton on Tees

33  
34 TS17 6BH

35  
36 Word count: 2903

37  
38 Keywords: employment, unemployment, economic inactivity, self rated health, socio-economic  
39  
40  
41  
42  
43  
44  
45  
46  
47  
48  
49  
50  
51  
52  
53  
54  
55  
56  
57  
58  
59  
60



**Abstract**

**Objectives :** To assess using individual level data how the proportion of people in different employment statuses may have played a role in the prevalence of poor self rated health from 1978 to 2004 as there have been major changes in employment patterns in advanced market democracies and employment is an important correlate of health.

**Design:** Individual level analysis of repeated cross-sectional surveys

**Setting:** UK

**Participants:** 125,125 men and 139,535 women of working age (25 to 59)

**Outcome measure:** Self rated general health

**Results:** Compared to 1978 there was evidence of higher levels of poor health in the subsequent years. For example in 2004 the prevalence of poor health was 2.8 (95% CI 1.7 to 3.9) and 1.3 (0.1 to 2.5) percentage points higher than 1978 for men and women respectively after adjusting for age. After additional adjustment for socio-economic characteristics, annual differences compared to 1978 increased (5.4 (4.2 to 6.5) and 4.4 (3.2 to 5.6) for men and women in 2004). Further adjustment for employment status however attenuated the annual differences in poor health (0.7 (-0.3 to 1.7) for men and 1.5 (0.3 to 2.6) for women in 2004). **Conclusions:** These results suggest that the proportion of people in different employment statuses, particularly the proportion in sickness or disability related economic inactivity, could play an important role in the prevalence of poor self rated health in the UK. Whether decreasing economic inactivity would enhance population health is an open question that needs further investigation.

**Trial registration:** This observational study was not reregistered.

**Article summary****Article focus**

- There have been major changes in employment (particularly the growth of those out of work sick or disabled) since the 1970s in many OECD countries.
- Given that self rated health is associated strongly with employment status the changes in employment may potentially be important for the level of poor health in the population.

**Key messages**

- Accounting for population increases in socio-economic characteristics associated with good health suggests that self rated health may have worsened since 1978 for both working age men and women.
- Much of this deterioration disappeared when controlling for employment status.
- There seems to be an association between rising levels of detachment from the labour market for both men and women (even given the rise in women's employment) and the level of poor self rated health in the population.

**Strengths and limitations**

- The study uses consistent individual level data from a long term survey covering a period of socio-economic change.
- Further work is needed to understand whether decreasing economic inactivity would necessarily lead to improved population health.

## Introduction

Since the late 1970s, there have been substantial social, political and economic changes in the UK and in other advanced market democracies. On the one hand, average levels of education and material wealth have increased in the UK since the 1970s [1] and there have been improvements to overall mortality levels and life expectancy. On the other hand, there have been increases in inequalities in wealth and health [1, 2]. Welfare provision has decreased [3] at the same time as there have been large reductions in male employment levels and a related rise in male and female (excluding keeping house) economic inactivity rates [4]. The rise of economic inactivity has been linked to the de-industrialisation experienced by the labour markets of advanced market democracies and the associated loss of full-time, permanent, well-paid and skilled industrial jobs [5].

Being out of work has consistently been associated with a heightened risk of mortality [6], mental ill-health and suicide [7, 8], unhappiness [9], poor general health [10] and limiting long term illness [11, 12]. This heightened risk of ill-health applies not just to those unemployed (out of work and actively seeking work) but also to those economically inactive (out of work and not actively seeking work) [9, 10, 13]. Indeed, previous work suggested that the distribution of economic inactivity was a potentially important factor behind the social gradient in health and in regional differences in health inequalities [10, 14].

Whilst there has been a wealth of research into the association between unemployment and adverse health, there has been much less which examines economic inactivity. Arguably, it is the latter which is of increasing importance in public health terms as whilst unemployment is generally cyclical – rising and falling in line with economic contraction and expansion – economic inactivity has increasingly become a structural labour market problem [4]. For example in the UK, according to the 1966 census 94.4% of non-student working age men were in employment and only 3% were economically inactive whilst in the 2001 census, the figures were 80.2% and 14.5% respectively [15]. This paper examines the potential impact of the changing pattern of employment status on the prevalence of poor self rated health from 1978 to 2004 using individual level data from a repeated cross-sectional survey.

## Methods

The General Household Survey is a UK government repeated cross-sectional household survey that started in 1971 (with gaps in 1997 and 1999). It aimed to interview all adults in selected households. The exact sampling procedures to select households have changed over time but it has employed a stratified (by regional geography and area socio-economic characteristics) clustered sample method with the primary sample units being small (as a rough guide 5000 people) geographical areas (electoral wards until 1983 and postcode sectors thereafter). Households were then randomly selected from within these primary sampling units. It covers Britain rather than the whole of the UK (so excludes Northern Ireland). Its long running nature means that it is highly suitable for assessing change over time. The UK's Office for National Statistics (ONS) has produced a consistent (in terms of making variables as comparable as possible over time) time-series of the surveys 1972 to 2004 and it is this individual level dataset - available from the UK Data Archive - that was used in this analysis [16]. Analysis was limited to men and women aged 25 to 59. The lower age limit was chosen to limit the likelihood of people still being in higher education. Although state retirement age in the UK for the study period was 65 for men and 60 for women, it is common practice to restrict analysis to age 59 and below to limit the number of people who have taken voluntary early retirement straight from paid employment.

The health outcome was self rated general health, with respondents asked "Over the last 12 months, would you say your health has on the whole been: good; fairly good or not good?". For this analysis, it was recoded good and fairly good health (0) versus not good (1) and this latter category is referred to as poor health from now on. The question was first asked in 1977 but the introduction to the question was different in this year so 1978 is taken as the reference year. Individual level employment status was coded as employed, unemployed (out of work but actively seeking work), and the following categories of economic inactivity: retired, in education, keeping house full-time, sick or disabled and other economically inactive. As the employment status variables in the time series file had only three categories (employed, unemployed and economic inactive) we returned to the original annual survey files to compile the more nuanced categories of individual level economic inactivity. Single year of age was used in the analysis. Three measures of socio-economic position were used with categories made consistent as possible over time by the ONS, whether the person had a university level degree or not, whether they lived in owned outright housing, owned with mortgage housing, private rented housing or social (state or housing association) rented housing and finally, whether they lived in

1  
2  
3 a household with car access. Across all years, a total of 10% of men and 4% of women in the sample had  
4  
5 missing data for one or more of the variables. In sensitivity analysis we used multiple imputation  
6  
7 (implemented using the ice command in Stata) to impute missing data. We did the imputation for men and  
8  
9 women and for each year separately. Twenty imputed datasets were created for each year / gender  
10  
11 combination. The imputed models were based on all variables already described plus country of residence  
12  
13 (England, Wales, Scotland) and marital status. The main results using the imputed datasets are shown in the  
14  
15 supplement.

16  
17  
18 For the main analysis we pooled data from all the survey years. The prevalence of poor health amongst  
19  
20 individual respondents in all other years (1979-2004) was compared to 1978 using a logistic regression model  
21  
22 containing year dummy variables with standard errors accounting for the household clustering in the survey  
23  
24 (although this was minimal as men and women in the same household were analysed separately). The initial  
25  
26 model (model A) controlled for age only. Model B additionally adjusted for the socio-economic variables as  
27  
28 these are variables associated with general health [17]. Model C then controlled additionally for employment  
29  
30 status to assess its impact on the annual differences. In sensitivity analysis we checked the pattern of results  
31  
32 using multilevel models where we treated year as a random intercept (individuals nested in years) and these  
33  
34 results are shown in the supplement. Non-response weights are included in the time series General Household  
35  
36 Survey file from 2000 onwards (when weights were introduced) and these have been applied in the main  
37  
38 analysis (weights are scaled to have a mean of 1 in each year) with each individual in the years prior to 2000  
39  
40 being weighted equally (at 1). As odds ratios across different logistic models are not directly comparable [18]  
41  
42 we also present the main results as adjusted prevalence differences (that are comparable across models [18])  
43  
44 by using the post estimation “margins” command in Stata. This shows yearly differences on an absolute scale.  
45  
46  
47

48 Even though each annual GHS sample is relatively large, pooling the data had the advantage of increasing the  
49  
50 sample for certain categories of the variables (economic inactivity for example) that in each year were  
51  
52 relatively small. Pooling also provided a direct test of year-on-year differences. One disadvantage is that the  
53  
54 coefficient for the variables is assumed to be the same over the years. We tested the possible impact of  
55  
56 allowing coefficients to vary over the years in two ways. Firstly in our multilevel modelling we fitted a random  
57  
58 coefficient model where we allowed the coefficients for employment status to vary over the years (models  
59  
60

1  
2  
3 allowing all variables (age, socio-economic characteristics and employment status) to vary in the multilevel  
4  
5 model unfortunately did not converge).

6  
7 Second we used decomposition analysis to compare the observed difference in prevalence of poor health  
8  
9 between the initial year (1978) and the final year (2004) using separate logistic regression models for each of  
10  
11 these years. This means that the coefficients are allowed to be different between the years. This method  
12  
13 allows the difference in prevalence of poor health to be separated into the part associated with changes in the  
14  
15 characteristics of the population between 2004 and 1978 and that associated with changes in size of  
16  
17 coefficients (including the intercept) between 2004 and 1978. For example, comparing an age adjusted model  
18  
19 would mean that the prevalence difference between the two years could be assigned to changes in the effect  
20  
21 size of the coefficients (in this case the age coefficient and the constant) and that due to changes in the age  
22  
23 composition of the population (for example if the population had a higher average age in 2004 compared to  
24  
25 1978). We apply the same models (A, B and C) from the main analysis. We use the mvdcmp command in Stata  
26  
27 to conduct the decomposition [19]. Stata 11.2 was used for the analysis apart from the multilevel modelling  
28  
29 that was conducted in MLwiN.

### 30 31 32 **Results**

33  
34 The total sample sizes across all years were 138,932 men and 145,300 women and these were reduced to  
35  
36 125,125 and 139,535 respectively in the complete case analysis when cases with missing data were excluded.  
37  
38 Table 1 includes the response rates and individual year sample sizes for the complete cases.

39  
40 Table 1 shows that for men the prevalence of poor health was low in 1978 (it was lowest in 1982) and then  
41  
42 increased to 10.7% in 2004 a rise of 3.3 percentage points over the period. The rate of poor health was lowest  
43  
44 for women in 1984 having declined slightly from 1978, although in the 1990s the rate rose and was just over 1  
45  
46 percentage point higher at the end of period compared to the start. The rate of poor health was always higher  
47  
48 for women than men over the period.

49  
50  
51  
52 There was clear change in the socio-economic characteristics of the population over the period with declines in  
53  
54 the proportion living in social rented housing and increases in the proportion living in owner occupied housing,  
55  
56 living in households with car access and the proportion with degrees (Figure 1).  
57  
58  
59  
60

Table 1 Response rates, sample sizes\*\* and prevalence\*\* of poor health for men and women by year.

| Year | Response rate* (%) | Number of men | % of men in poor health | Number of women | % of women in poor health |
|------|--------------------|---------------|-------------------------|-----------------|---------------------------|
| 1978 | 82                 | 6258          | 7.4                     | 6777            | 11.3                      |
| 1979 | 83                 | 6097          | 8.0                     | 6557            | 11.1                      |
| 1980 | 82                 | 6129          | 8.7                     | 6659            | 12.2                      |
| 1981 | 84                 | 6348          | 7.7                     | 6860            | 11.4                      |
| 1982 | 84                 | 5299          | 6.9                     | 5784            | 10.1                      |
| 1983 | 82                 | 5030          | 7.6                     | 5618            | 11.6                      |
| 1984 | 81                 | 4855          | 7.6                     | 5375            | 9.5                       |
| 1985 | 82                 | 5041          | 7.3                     | 5542            | 10.4                      |
| 1986 | 84                 | 5175          | 7.4                     | 5645            | 10.2                      |
| 1987 | 85                 | 5295          | 7.3                     | 5739            | 10.5                      |
| 1988 | 85                 | 5082          | 8.0                     | 5578            | 10.2                      |
| 1989 | 84                 | 5205          | 7.4                     | 5677            | 10.0                      |
| 1990 | 81                 | 4833          | 7.8                     | 5322            | 11.0                      |
| 1991 | 84                 | 5110          | 7.8                     | 5614            | 10.3                      |
| 1992 | 83                 | 5070          | 8.1                     | 5690            | 9.8                       |
| 1993 | 82                 | 4890          | 7.9                     | 5434            | 10.8                      |
| 1994 | 80                 | 4734          | 9.6                     | 5398            | 11.2                      |
| 1995 | 80                 | 4705          | 10.6                    | 5488            | 11.4                      |
| 1996 | 76                 | 4326          | 8.0                     | 5111            | 11.4                      |
| 1998 | 72                 | 4044          | 11.3                    | 4740            | 12.3                      |
| 2000 | 67                 | 4008          | 10.1                    | 4548            | 12.2                      |
| 2001 | 72                 | 4358          | 10.3                    | 5058            | 12.1                      |
| 2002 | 69                 | 4183          | 11.1                    | 4818            | 12.0                      |
| 2003 | 70                 | 4885          | 10.1                    | 5651            | 12.5                      |
| 2004 | 69                 | 4165          | 10.7                    | 4852            | 12.8                      |

\*Response rates are from <http://www.esds.ac.uk/doc/5640/mrdoc/pdf/5640ghs05appendixb.pdf> (page 10)\*\*  
 Sample size and prevalence of poor health for the complete case sample.

Taking these developments in the socio-economic characteristics of the population into account by controlling for the socio-economic variables in model B generally increased annual differences compared to 1978 when model B is compared to model A which controlled only for age differences.

Overall male employment had fallen from 93% to 85% at the end of the period. Figure 2 illustrates the changes in the proportion of people in the various non-employment statuses over time with male unemployment (left panel) being cyclical, peaking in the mid 1980s and the early 1990s recession then falling away and being over taken by those sick or disabled in the late 1990s with this group now being the largest. Other forms of economic inactivity for males showed some increases but remained relatively small. For women, figure 2 (right panel) shows (reading the right hand axis) that there had been a 20 percentage point decline in those keeping home but, as for men, cyclical unemployment, a rise in those sick or disabled

1  
2  
3  
4  
5  
6  
7  
8  
9  
10  
11  
12  
13  
14  
15  
16  
17  
18  
19  
20  
21  
22  
23  
24  
25  
26  
27  
28  
29  
30  
31  
32  
33  
34  
35  
36  
37  
38  
39  
40  
41  
42  
43  
44  
45  
46  
47  
48  
49  
50  
51  
52  
53  
54  
55  
56  
57  
58  
59  
60

overtaking those unemployed and a rise in those retired or in education. However unlike for men, female employment rose by 13 percentage points over the period from 61% to 74%

For peer review only



Table 2 Logistic regression results for rate of poor health for men and women controlling for age (Model A), additionally the listed socio-economic characteristics (model B) and additionally employment status (Model C)

|      | Men (Model A)<br>ORs (95% CIs) | Men (Model B)<br>ORs (95% CIs) | Men (Model C)<br>ORs (95% CIs) | Women (Model A)<br>ORs (95% CIs) | Women (Model B)<br>ORs (95% CIs) | Women (Model C)<br>ORs (95% CIs) |
|------|--------------------------------|--------------------------------|--------------------------------|----------------------------------|----------------------------------|----------------------------------|
| Age  | 1.06 (1.05 to 1.06)            | 1.05 (1.05 to 1.06)            | 1.04 (1.04 to 1.04)            | 1.04 (1.03 to 1.04)              | 1.03 (1.03 to 1.04)              | 1.03 (1.02 to 1.03)              |
| Year |                                |                                |                                |                                  |                                  |                                  |
| 1978 | 1                              | 1                              | 1                              | 1                                | 1                                | 1                                |
| 1979 | 1.08 (0.94 to 1.24)            | 1.09 (0.95 to 1.25)            | 1.02 (0.89 to 1.18)            | 0.98 (0.88 to 1.09)              | 0.98 (0.88 to 1.1)               | 0.98 (0.88 to 1.1)               |
| 1980 | 1.2 (1.05 to 1.37)             | 1.24 (1.08 to 1.42)            | 1.14 (0.99 to 1.31)            | 1.09 (0.98 to 1.21)              | 1.11 (1 to 1.24)                 | 1.13 (1.01 to 1.26)              |
| 1981 | 1.05 (0.92 to 1.21)            | 1.09 (0.95 to 1.25)            | 0.95 (0.83 to 1.1)             | 1.01 (0.91 to 1.13)              | 1.04 (0.93 to 1.16)              | 1.02 (0.91 to 1.14)              |
| 1982 | 0.93 (0.81 to 1.08)            | 0.99 (0.85 to 1.15)            | 0.8 (0.68 to 0.93)             | 0.89 (0.79 to 1)                 | 0.93 (0.83 to 1.04)              | 0.9 (0.8 to 1.01)                |
| 1983 | 1.03 (0.89 to 1.19)            | 1.12 (0.96 to 1.29)            | 0.83 (0.71 to 0.97)            | 1.04 (0.93 to 1.16)              | 1.12 (1 to 1.26)                 | 1.03 (0.91 to 1.16)              |
| 1984 | 1.07 (0.92 to 1.23)            | 1.24 (1.07 to 1.44)            | 0.91 (0.78 to 1.06)            | 0.84 (0.74 to 0.95)              | 0.94 (0.83 to 1.06)              | 0.85 (0.75 to 0.96)              |
| 1985 | 1.01 (0.88 to 1.17)            | 1.17 (1.01 to 1.36)            | 0.81 (0.69 to 0.95)            | 0.94 (0.83 to 1.05)              | 1.06 (0.94 to 1.19)              | 0.94 (0.84 to 1.06)              |
| 1986 | 1.03 (0.89 to 1.19)            | 1.27 (1.09 to 1.47)            | 0.89 (0.76 to 1.04)            | 0.92 (0.82 to 1.03)              | 1.06 (0.95 to 1.2)               | 0.96 (0.85 to 1.08)              |
| 1987 | 1.01 (0.88 to 1.17)            | 1.3 (1.12 to 1.5)              | 0.88 (0.76 to 1.03)            | 0.95 (0.85 to 1.06)              | 1.13 (1 to 1.27)                 | 0.98 (0.87 to 1.11)              |
| 1988 | 1.11 (0.96 to 1.27)            | 1.43 (1.24 to 1.65)            | 0.99 (0.85 to 1.15)            | 0.91 (0.81 to 1.02)              | 1.09 (0.97 to 1.23)              | 0.98 (0.87 to 1.1)               |
| 1989 | 1.01 (0.87 to 1.16)            | 1.33 (1.15 to 1.54)            | 0.84 (0.72 to 0.99)            | 0.9 (0.8 to 1.01)                | 1.1 (0.97 to 1.23)               | 0.95 (0.84 to 1.07)              |
| 1990 | 1.1 (0.95 to 1.26)             | 1.47 (1.27 to 1.7)             | 0.91 (0.77 to 1.06)            | 1 (0.89 to 1.12)                 | 1.22 (1.09 to 1.38)              | 1.06 (0.93 to 1.19)              |
| 1991 | 1.08 (0.94 to 1.24)            | 1.43 (1.23 to 1.65)            | 0.86 (0.74 to 1.01)            | 0.93 (0.83 to 1.04)              | 1.15 (1.02 to 1.29)              | 0.93 (0.82 to 1.05)              |
| 1992 | 1.11 (0.97 to 1.28)            | 1.51 (1.31 to 1.75)            | 0.85 (0.73 to 0.99)            | 0.87 (0.77 to 0.98)              | 1.09 (0.97 to 1.23)              | 0.85 (0.75 to 0.97)              |
| 1993 | 1.11 (0.96 to 1.28)            | 1.52 (1.31 to 1.76)            | 0.79 (0.67 to 0.92)            | 0.98 (0.88 to 1.1)               | 1.23 (1.09 to 1.38)              | 0.95 (0.84 to 1.08)              |
| 1994 | 1.35 (1.17 to 1.55)            | 1.85 (1.61 to 2.13)            | 0.97 (0.83 to 1.13)            | 1.02 (0.91 to 1.15)              | 1.28 (1.13 to 1.43)              | 1.01 (0.89 to 1.14)              |
| 1995 | 1.5 (1.31 to 1.71)             | 2.11 (1.84 to 2.43)            | 1.1 (0.94 to 1.27)             | 1.03 (0.92 to 1.15)              | 1.34 (1.19 to 1.5)               | 1.02 (0.91 to 1.16)              |

|    |                     |                     |                     |                        |                     |                     |                        |
|----|---------------------|---------------------|---------------------|------------------------|---------------------|---------------------|------------------------|
| 1  |                     |                     |                     |                        |                     |                     |                        |
| 2  |                     |                     |                     |                        |                     |                     |                        |
| 3  |                     |                     |                     |                        |                     |                     |                        |
| 4  |                     |                     |                     |                        |                     |                     |                        |
| 5  | 1996                | 1.11 (0.96 to 1.29) | 1.53 (1.32 to 1.78) | 0.71 (0.6 to 0.84)     | 1.03 (0.92 to 1.16) | 1.31 (1.16 to 1.47) | 0.94 (0.83 to 1.06)    |
| 6  | 1998                | 1.61 (1.4 to 1.85)  | 2.31 (2 to 2.66)    | 1.22 (1.05 to 1.43)    | 1.11 (0.99 to 1.25) | 1.47 (1.3 to 1.65)  | 1.07 (0.94 to 1.21)    |
| 7  | 2000                | 1.43 (1.24 to 1.65) | 2.06 (1.78 to 2.39) | 1.04 (0.88 to 1.23)    | 1.1 (0.98 to 1.24)  | 1.47 (1.3 to 1.66)  | 1.1 (0.97 to 1.25)     |
| 8  | 2001                | 1.47 (1.27 to 1.69) | 2.13 (1.85 to 2.46) | 1.13 (0.97 to 1.32)    | 1.08 (0.96 to 1.21) | 1.46 (1.3 to 1.64)  | 1.05 (0.93 to 1.2)     |
| 9  | 2002                | 1.53 (1.33 to 1.76) | 2.25 (1.95 to 2.59) | 1.3 (1.11 to 1.52)     | 1.07 (0.95 to 1.2)  | 1.45 (1.28 to 1.63) | 1.09 (0.96 to 1.24)    |
| 10 | 2003                | 1.38 (1.2 to 1.58)  | 2.03 (1.76 to 2.34) | 1.08 (0.93 to 1.27)    | 1.11 (0.99 to 1.24) | 1.5 (1.34 to 1.69)  | 1.12 (0.99 to 1.27)    |
| 11 | 2004                | 1.44 (1.25 to 1.66) | 2.09 (1.81 to 2.41) | 1.11 (0.95 to 1.31)    | 1.14 (1.01 to 1.27) | 1.56 (1.38 to 1.75) | 1.18 (1.04 to 1.33)    |
| 12 |                     |                     |                     |                        |                     |                     |                        |
| 13 |                     |                     |                     |                        |                     |                     |                        |
| 14 |                     |                     |                     |                        |                     |                     |                        |
| 15 | No degree           |                     | 1                   | 1                      |                     | 1                   | 1                      |
| 16 | Degree              |                     | 0.49 (0.45 to 0.54) | 0.59 (0.54 to 0.65)    |                     | 0.56 (0.51 to 0.61) | 0.66 (0.6 to 0.72)     |
| 17 |                     |                     |                     |                        |                     |                     |                        |
| 18 |                     |                     |                     |                        |                     |                     |                        |
| 19 | Owned outright      |                     | 1                   | 1                      |                     | 1                   | 1                      |
| 20 | Owned with mortgage |                     | 0.75 (0.7 to 0.8)   | 0.95 (0.89 to 1.02)    |                     | 0.97 (0.92 to 1.03) | 1.1 (1.03 to 1.16)     |
| 21 | Private rent        |                     | 1.15 (1.05 to 1.26) | 1.2 (1.08 to 1.33)     |                     | 1.31 (1.21 to 1.42) | 1.31 (1.2 to 1.42)     |
| 22 | Social rent         |                     | 1.88 (1.76 to 2.01) | 1.46 (1.35 to 1.58)    |                     | 1.98 (1.87 to 2.1)  | 1.72 (1.62 to 1.83)    |
| 23 |                     |                     |                     |                        |                     |                     |                        |
| 24 |                     |                     |                     |                        |                     |                     |                        |
| 25 | No car              |                     | 1                   | 1                      |                     | 1                   | 1                      |
| 26 | Car                 |                     | 0.54 (0.51 to 0.57) | 0.85 (0.8 to 0.91)     |                     | 0.6 (0.58 to 0.63)  | 0.73 (0.69 to 0.76)    |
| 27 |                     |                     |                     |                        |                     |                     |                        |
| 28 |                     |                     |                     |                        |                     |                     |                        |
| 29 | Employed            |                     |                     | 1                      |                     |                     | 1                      |
| 30 | Unemployed          |                     |                     | 2.01 (1.86 to 2.18)    |                     |                     | 1.81 (1.65 to 1.98)    |
| 31 | Keeping house       |                     |                     | 2.64 (2.16 to 3.23)    |                     |                     | 1.81 (1.74 to 1.89)    |
| 32 | Sick or disabled    |                     |                     | 28.07 (26.11 to 30.19) |                     |                     | 20.05 (18.68 to 21.52) |
| 33 |                     |                     |                     |                        |                     |                     |                        |
| 34 | Education           |                     |                     | 1.85 (1.33 to 2.58)    |                     |                     | 1.26 (0.96 to 1.65)    |
| 35 | Retired             |                     |                     | 2.59 (2.2 to 3.04)     |                     |                     | 2.12 (1.88 to 2.4)     |
| 36 | Other inactive      |                     |                     | 6.28 (5.46 to 7.21)    |                     |                     | 4.04 (3.44 to 4.75)    |
| 37 |                     |                     |                     |                        |                     |                     |                        |
| 38 |                     |                     |                     |                        |                     |                     |                        |
| 39 |                     |                     |                     |                        |                     |                     |                        |
| 40 |                     |                     |                     |                        |                     |                     |                        |
| 41 |                     |                     |                     |                        |                     |                     |                        |
| 42 |                     |                     |                     |                        |                     |                     |                        |
| 43 |                     |                     |                     |                        |                     |                     |                        |
| 44 |                     |                     |                     |                        |                     |                     |                        |
| 45 |                     |                     |                     |                        |                     |                     |                        |
| 46 |                     |                     |                     |                        |                     |                     |                        |
| 47 |                     |                     |                     |                        |                     |                     |                        |
| 48 |                     |                     |                     |                        |                     |                     |                        |
| 49 |                     |                     |                     |                        |                     |                     |                        |

1  
2  
3  
4  
5  
6 All forms of non employment were associated with an elevated probability of poor health but those sick or  
7 disabled had a particularly strong association (Table 2 – Model C). Controlling for individual level employment  
8 status (model C in table 2) attenuated the odds ratios for poor health for the years subsequent to 1978 for  
9 men and women. Pseudo r2 statistics indicated that model fit improved from model A (age only- 0.04 & 0.02  
10 form men and women respectively) to model B (plus socio-economic characteristics – 0.09 & 0.05) to model C  
11 (plus employment – 0.22 & 0.13) for men and women respectively. Absolute prevalence differences compared  
12 to 1978 from each model are illustrated for men and women in figures 3 and 4 respectively. These highlight  
13 the possible linear increase in poor health year-on-year after controlling for socio-economic characteristics  
14 (Model B) and the attenuating impact of controlling for employment status (Model C). For men controlling for  
15 employment status led to yearly differences from 1978 being lower than for the age only model whereas for  
16 women it led to differences being very similar to the age only model. In the supplement results from the  
17 multiple imputation are shown and are very similar to those in Figure 3 and Figure 4. Results (shown in the  
18 supplement) from the multilevel modelling where year was treated as a random intercept rather than a fixed  
19 covariate showed a very similar pattern in that a clearer year-on-year increase in poor health from 1978 is  
20 apparent in model B compared to model A and that adjustment for employment status (model C) attenuated  
21 these differences even when the effect of employment status was allowed to vary over the years (model D).  
22  
23  
24  
25  
26  
27  
28  
29  
30  
31  
32  
33  
34  
35  
36  
37  
38  
39

40 The results from the decomposition analysis comparing – using separate logistic regression for each year - the  
41 unadjusted observed prevalence difference between 2004 and 1978 are presented in Table 3. For men,  
42 prevalence was 3.3 percentage points higher in 2004 (as shown in Table 1). When adding age only to the  
43 model (Model A) most of the observed difference was not due to changes in the population characteristics  
44 (the population in 2004 was slightly older hence a small part (0.4 percentage points) of the increase was due to  
45 this). Socio-economic characteristics of the population had changed in 2004 (Figure 1) and, model B shows that  
46 health in 2004 could have been considerably better (-4.2 percentage points lower) given the socio-economic  
47 characteristics in 2004 compared to 1978. Instead it was the changes in the coefficients that were associated  
48 with the actual increase in poor health from 1978 to 2004. However, when employment status is added in  
49 model C most of the increase in poor health is now explained by the change in population characteristics from  
50  
51  
52  
53  
54  
55  
56  
57  
58  
59  
60

1978 to 2004. For women, the pattern of results is similar to men for the smaller 1.5 percentage point increase in poor health in 2004 although in model C most of the change is due to changes in coefficients. These results reflect those of the main analysis where controlling for both our socio-economic and employment status variables suggested that for men the difference between 2004 and 1978 would have been slightly lower than the age adjusted difference and for women it would have been very similar.

Table 3 Results for the decomposition analysis for the prevalence difference in poor health in 2004 from 1978 for men and women – model A adjusts for age, model B additionally adjusts for housing tenure, car access and degree attainment, model C adjusts additionally for employment

|                           | Model A – Prevalence difference and 95% CIs*) | Model B             | Model C            |
|---------------------------|-----------------------------------------------|---------------------|--------------------|
| <b>Men</b>                |                                               |                     |                    |
| Due to population change  | 0.4 (0.4 to 0.5)                              | -4.2 (-5 to -3.5)   | 2.4 (1.7 to 3.2)   |
| Due to coefficient change | 2.8 (1.7 to 4.0)                              | 7.5 (6.0 to 9.0)    | 0.8 (-0.5 to 2.1)  |
| Overall difference        | 3.3 (2.1 to 4.4)                              | 3.3 (2.2 to 4.4)    | 3.3 (2.3 to 4.3)   |
| <b>Women</b>              |                                               |                     |                    |
| Due to population change  | 0.2 (.2 to .3)                                | -4.4 (-5.2 to -3.7) | -0.1 (-0.9 to 0.8) |
| Due to coefficient change | 1.3 (0.1 to 2.5)                              | 5.9 (4.4 to 7.5)    | 1.6 (0.1 to 3.1)   |
| Overall Difference        | 1.5 (0.3 to 2.7)                              | 1.5 (0.3 to 2.7)    | 1.5 (0.4 to 2.6)   |

\*Confidence intervals do not account for household clustering as this option is not presently available for mvdcmp

## Discussion

The individual level analysis presented here shows that accounting for shifts in the proportion of the working age population in different employment statuses – most notably the rise of sickness or disability related economic inactivity – attenuated annual differences in the prevalence of poor self rated health in the UK population since the late 1970s. This complements previous individual level analysis into sickness or disability related economic inactivity which found that it was a possible major factor behind the social gradient in health [14] as well as a possible influential issue in regional differences in health [10]. The results suggest that a fuller understanding of why employment status is associated with self-rated health could be important for public health. The relationship between employment status and health is complicated. Systematic reviews have concluded that there is evidence that poor health can cause job loss and that job loss can cause poor health with the latter possibly being the stronger effect of the two [6, 7]. For self-rated general health, there is also evidence of health selection [20] but also causation [21]. So it is possible that rising rates of poor general health have increased economic inactivity. The debate over the relative influence of employment on health versus health on employment is limited though because it tends to emphasise notions of people being in a state of health that either allows them to work or not: a zero-sum approach. Yet, it should be remembered that ill health for the majority is not an impediment to labour market participation [22] but that those in ill-health - particularly in lower socio-economic positions - are most vulnerable to non-employment and were increasingly so in the period under study [22, 23]. So their job loss may not then be caused by their ill-health per se but by the prevailing labour market conditions and the policy response to these [24, 25].

Evidence suggests that the increases in the economically inactive population (particularly those claiming sickness related benefits) in the UK during this period were due to difficult labour market conditions (particularly in de-industrialised areas) [5] [26]. This resulted in those with health conditions (particularly if also from low socio-economic positions) finding themselves towards the back of the job queue and unlikely to find employment [5]. In this sense it is argued that many of those economically inactive because of sickness or disability are “hidden unemployed” as they may be employed given different labour market conditions. [5]. Indeed, in better labour market conditions it is argued that there is “hidden sickness” amongst the active

1  
2  
3 workforce [5]. This does not necessarily require any change in the individual level of ill-health in the population  
4 just change in the proportion of people who are employed. Recent theoretical work on how people self-rate  
5 their general health suggests a cognitive process where people take account of their individual health situation  
6 but do so in the wider context in which they live [27]. Hence the assessment of one's health while being  
7 economically inactive may differ compared to when one is in or seeking work. For example, there is  
8 longitudinal evidence that the reporting of longstanding illness may depend on labour market status with  
9 employment reducing the likelihood of reporting poor health [28]. Coupled to the health damaging  
10 psychological and material consequences of non-work [29] this may allow us to understand why economic  
11 inactivity may be associated with a higher risk of poor general health at the individual level.

12  
13  
14  
15  
16  
17  
18  
19  
20 Of course, confounding is a real possibility within this repeated cross-sectional study. For example, there could  
21 be other confounding or mediating trends that are associated with both general health and employment that  
22 could explain the impact of adjusting for changes in employment status. Examples include the apparent  
23 decline in job quality over time [30] and macro-economic changes such as the rise in the level of income  
24 inequality.

25  
26  
27  
28  
29  
30  
31  
32 Economic inactivity is also a potentially important influence on population health, not just because of the  
33 composition of the inactive population itself, but also because it is generally a longer term state. For example,  
34 a recent cohort study of people out of work and in receipt of incapacity-related benefits in the UK found that  
35 the average length of economic inactivity amongst this group was nine years [31]. Thus the issues which are  
36 usually put forward to explain the association between unemployment and ill health – most notably poverty,  
37 social exclusion and low social status – are thus experienced for a much longer time period by those who are  
38 inactive than by those who are unemployed.

39  
40  
41  
42  
43  
44  
45  
46  
47  
48 Whilst our results suggest that decreasing the numbers of economically inactive could have health benefits,  
49 this is by no means an easy task and not just because of the current economic climate. Research into welfare  
50 to work interventions for those with a disability or chronic illness has found that even in times of solid  
51 economic growth it is very difficult to increase the employment rate of this group. For example, in the UK since  
52 the 1990s there have been increasing efforts to enhance the labour market participation of this group using  
53 various interventions including education, training and work placement schemes; vocational advice and  
54  
55  
56  
57  
58  
59  
60

1  
2  
3 support services; vocational rehabilitation; in-work benefits; financial incentives for employers; employment  
4 rights legislation and accessibility interventions[4]. However, the evidence of effectiveness in terms of actually  
5 increasing employment is very limited [4, 32-34]. This is partly attributed to the largely supply-side orientation  
6 of most of the interventions [4], the focus on employment rather than health improvement [31, 35] and the  
7 lack of demand from employers for workers with complicated and fluctuating health conditions [31].

8  
9 In addition to being only cross-sectional, another limitation of using the General Household Survey is that  
10 response rate fell over time; weighting was introduced in 2000 and we have applied this in all analysis but the  
11 possibility remains that the survey became increasingly unrepresentative over time. It is impossible to assess  
12 the impact of this on our results as we do not have details of non responders. However, evidence comparing a  
13 national census to a national health survey suggested that low socio-economic groups and the out of work  
14 were less well represented in the survey leading to a more conservative estimate of the social gradient in  
15 health in the survey [36].  
16  
17  
18  
19  
20  
21  
22  
23  
24  
25  
26  
27

## 28 **Conclusion**

29  
30 To summarise, this study shows that poor health may have worsened amongst both men and women from  
31 1978 to 2004 when accounting for socio-economic changes. However, controlling for the employment status  
32 changes in the UK since 1978 attenuated the increase in poor general health. This research raises important  
33 public policy issues around the role of employment in overall public health which should be examined further.  
34  
35  
36  
37

## 38 **Acknowledgements**

39  
40 General Household Survey Time Series Dataset 1972-2004 was created by the Office for National Statistics. The  
41 user guide for the time series dataset was created jointly by ONS and the Economic and Social Data Service  
42 (ESDS) Government and downloaded from the UK Data Archive. The data are Crown copyright. The authors  
43 alone are responsible for the analysis and interpretation.  
44  
45  
46  
47

## 48 **Funding**

49  
50 No specific grant was associated with this was work. LG (5TK30) and FP (5TK10) are funded by the MRC  
51  
52

## 53 **Ethics approval**

54  
55 Not required for this secondary analysis of publically available and anonymised secondary data  
56  
57  
58  
59  
60

### Author contributions

FP had the original idea which was developed with CB. FP and LG conducted the analysis. FP drafted the manuscript with revisions from CB and LG.

### References

- 1 Dorling D, Rees P. A nation still dividing: the British census and social polarisation 1971 - 2001. *Environ Plan A* 2003;**35**:1287-313.
- 2 Thomas B, Dorling D, Davey Smith G. Inequalities in premature mortality in Britain: observational study from 1921 to 2007. *BMJ* 2010;**341**:c3639.
- 3 Eikemo TA, Bambra C. The welfare state: a glossary for public health. *J Epidemiol Community Health* 2008;**62**:3-6.
- 4 Bambra C. *Work, Worklessness, and the Political Economy of Health*. Oxford: Oxford University Press 2011.
- 5 Beatty C. A Theory of Employment, Unemployment and Sickness. *Reg Stud* 2000;**34**:617-30.
- 6 Roelfs DJ, Shor E, Davidson KW, et al. Losing life and livelihood: A systematic review and meta-analysis of unemployment and all-cause mortality. *Soc Sci Med* 2011;**72**:840-54.
- 7 Paul KI, Moser K. Unemployment impairs mental health: Meta-analyses. *J Vocat Behav* 2009;**74**:264-82.
- 8 Welch SS. A review of the literature on the epidemiology of parasuicide in the general population. *Psychiatr Serv* 2001;**52**:368.
- 9 Blanchflower D, Oswald A. International Happiness. *The Academy of Management Perspectives (formerly The Academy of Management Executive) (AMP)* 2011;**25**:6-22.
- 10 Bambra C, Popham F. Worklessness and regional differences in the social gradient in general health: Evidence from the 2001 English census. *Health Place* 2010;**16**:1014-21.
- 11 Bartley M, Plewis I. Accumulated labour market disadvantage and limiting long-term illness: data from the 1971-1991 Office for National Statistics' Longitudinal Study. *Int J Epidemiol* 2002;**31**:336-41.
- 12 Korpi T. Accumulating Disadvantage. Longitudinal Analyses of Unemployment and Physical Health in Representative Samples of the Swedish Population. *European Sociological Review* 2001;**17**:255-73.
- 13 Clemens T, Boyle P, Popham F. Unemployment, mortality and the problem of health-related selection: evidence from the Scottish and England & Wales (ONS) longitudinal studies. *Health Stat Q* 2009:7-13.
- 14 Popham F, Bambra C. Evidence from the 2001 English Census on the contribution of employment status to the social gradient in self-rated health. *J Epidemiol Community Health* 2010;**64**:277-80.
- 15 MacKay RR, Davies L. Unemployment, permanent sickness, and nonwork in the United Kingdom. *Environ Plan A* 2007;**40**:464-81.
- 16 User Guide for the General Household Survey (GHS) Time Series Dataset 1972 to 2004 (suitable for pseudo-cohort analysis). [http://www.esds.ac.uk/doc/5664%5Cmrdoc%5Cpdf%5C5664\\_ghs\\_time\\_series\\_user\\_guide.pdf](http://www.esds.ac.uk/doc/5664%5Cmrdoc%5Cpdf%5C5664_ghs_time_series_user_guide.pdf)
- 17 Macintyre S, McKay L, Der G, et al. Socio-economic position and health: what you observe depends on how you measure it. *J Public Health* 2003;**25**:288-94.
- 18 Mood C. Logistic Regression: Why We Cannot Do What We Think We Can Do, and What We Can Do About It. *Eur Sociol Rev* 2010;**26**:67-82.
- 19 Powers DA, Yoshioka H, Yun MS. mvdcmp: Multivariate decomposition for nonlinear response models. *Stata Journal* 2011;**11**:556.
- 20 Ki M, Sacker A, Kelly Y, et al. Health selection operating between classes and across employment statuses. *J Epidemiol Community Health* 2011;**65**:1132-9.
- 21 Sacker A, Wiggins RD, Bartley M, et al. Self-Rated Health Trajectories in the United States and the United Kingdom: A Comparative Study. *Am J Public Health* 2007;**97**:812-8.
- 22 Bartley M, Owen C. Relation between socioeconomic status, employment, and health during economic change, 1973-93. *BMJ* 1996;**313**:445-9.
- 23 Minton JW, Pickett KE, Dorling D. Health, employment, and economic change, 1973-2009: repeated cross sectional study. *BMJ* 2012;**344**.
- 24 Holland P, Burström B, Whitehead M, et al. How Do Macro-Level Contexts and Policies Affect the Employment Chances of Chronically Ill and Disabled People? Part I: The Impact of Recession and Deindustrialization. *Int J Health Serv* 2011;**41**:395-413.



- 1  
2  
3 25 Holland P, Nylén L, Thielen K, *et al.* How Do Macro-Level Contexts and Policies Affect the Employment  
4 Chances of Chronically Ill and Disabled People? Part II: The Impact of Active and Passive Labor Market Policies.  
5 *Int J Health Serv* 2011;**41**:415-30.
- 6 26 Beatty C, Fothergill S, Houston D, *et al.* A gendered theory of employment, unemployment, and  
7 sickness. *Environ Plan C* 2009;**27**:958-74.
- 8 27 Jylhä M. What is self-rated health and why does it predict mortality? Towards a unified conceptual  
9 model. *Soc Sci Med* 2009;**69**:307-16.
- 10 28 Bartley M, Sacker A, Clarke P. Employment status, employment conditions, and limiting illness:  
11 prospective evidence from the British household panel survey 1991-2001. *J Epidemiol Community Health*  
12 2004;**58**:501-6.
- 13 29 Bartley M, Ferrie J, Montgomery SM. Health and labour market disadvantage: unemployment, non-  
14 employment, and job insecurity. In: Marmot M, Wilkinson RG, eds. *Social determinants of health*. Oxford:  
15 Oxford University Press 2006:78-96.
- 16 30 Clark AE. Your Money or Your Life: Changing Job Quality in OECD Countries. *Br J Ind Relat*  
17 2005;**43**:377-400.
- 18 31 Warren J, Garthwaite K, Bamba C. 'A health problem? Health and employability in the UK labour  
19 market'. In: Houston D, Lindsay C, eds. *Disability Benefits and Employment Policy: Fit for Work? Fit for Purpose?*  
20 London: Palgrave in press.
- 21 32 Clayton S, Bamba C, Gosling R, *et al.* Assembling the evidence jigsaw: insights from a systematic  
22 review of UK studies of individual-focused return to work initiatives for disabled and long-term ill people. *BMC*  
23 *Public Health* 2011;**11**:170.
- 24 33 Bamba C, Whitehead M, Hamilton V. Does 'welfare-to-work' work? A systematic review of the  
25 effectiveness of the UK's welfare-to-work programmes for people with a disability or chronic illness. *Soc Sci*  
26 *Med* 2005;**60**:1905-18.
- 27 34 Barr B, Clayton S, Whitehead M, *et al.* To what extent have relaxed eligibility requirements and  
28 increased generosity of disability benefits acted as disincentives for employment? A systematic review of  
29 evidence from countries with well-developed welfare systems. *J Epidemiol Community Health* 2010;**64**:1106-  
30 14.
- 31 35 Bamba C. Doctors are key to welfare reform. *BMJ* 2010;**341**.
- 32 36 Lorant V, Demarest S, Miermans PJ, *et al.* Survey error in measuring socio-economic risk factors of  
33 health status: a comparison of a survey and a census. *Int J Epidemiol* 2007;**36**:1292-9.
- 34  
35  
36  
37  
38  
39  
40  
41  
42  
43  
44  
45  
46  
47  
48  
49  
50  
51  
52  
53  
54  
55  
56  
57  
58  
59  
60

1  
2  
3 Figure 1 Prevalence of housing tenure types, car access and degree attainment 1978 to 2004 for men and  
4 women aged 25 to 59  
5

6  
7 Figure 2 Prevalence of the different types of employment status 1978 to 2004 from men and women aged 25  
8 to 59  
9

10  
11 **Figure 3 Prevalence difference in poor health from 1978 (reference) to 2004 for men from model A (age  
12 adjusted), model B (plus adjustment for socio-economic characteristics) and model C (plus adjustment for  
13 employment status).**

14  
15  
16 **Figure 4 Prevalence difference in poor health from 1978 (reference) to 2004 for women from model A (age  
17 adjusted), model B (plus adjustment for socio-economic characteristics) and model C (plus adjustment for  
18 employment status).**  
19  
20  
21  
22  
23  
24  
25  
26  
27  
28  
29  
30  
31  
32  
33  
34  
35  
36  
37  
38  
39  
40  
41  
42  
43  
44  
45  
46  
47  
48  
49  
50  
51  
52  
53  
54  
55  
56  
57  
58  
59  
60

1  
2  
3  
4  
5  
6  
7 **The potential impact of employment status changes on the prevalence of poor self rated health.** Findings  
8 from UK individual level repeated cross-sectional data from 1978 to 2004.  
9

10  
11 **Frank Popham<sup>1</sup> Lindsay Gray<sup>1</sup> and Clare Bamba<sup>2</sup>**  
12

13  
14  
15 <sup>1</sup>MRC/CSO Social and Public Health Sciences Unit

16 4 Lilybank Gardens

17 Glasgow G12 8RZ

18 f.popham@sphsu.mrc.ac.uk  
19

20  
21  
22  
23  
24 Tel: +44 (0) 141 357 3949  
25

26  
27 <sup>2</sup>Department of Geography

28 Wolfson Research Institute

29 Durham University, Queens Campus

30 Stockton on Tees

31 TS17 6BH  
32

33  
34  
35 Word count: 2903  
36

37  
38 Keywords: employment, unemployment, economic inactivity, self rated health, socio-economic  
39  
40  
41  
42  
43  
44  
45  
46  
47  
48  
49  
50  
51  
52  
53  
54  
55  
56  
57  
58  
59  
60

**Abstract**

**Objectives :** To assess [using individual level data](#) how [the proportion of people in different](#) employment statuses [may have played a role in the prevalence of poor](#) self rated health from 1978 to 2004 as there have been major changes in employment patterns in advanced market democracies and employment is an important [correlate](#) of health.

**Design:** [Individual level](#) analysis of repeated cross-sectional surveys

**Setting:** UK

**Participants:** [125,125](#) men and [139,535](#) women of working age (25 to 59)

**Outcome measure:** Self rated general health

**Results:** [Compared to 1978 there was evidence of higher levels of poor health in the subsequent years. For example in 2004 the prevalence of poor health was 2.8 \(95% CI 1.7 to 3.9\) and 1.3 \(0.1 to 2.5\) percentage points higher than 1978 for men and women respectively after adjusting for age. After additional adjustment for socio-economic characteristics, annual differences compared to 1978 increased \(5.4 \(4.2 to 6.5\) and 4.4 \(3.2 to 5.6\) for men and women in 2004\). Further adjustment for employment status however attenuated the annual differences in poor health \(0.7 \(-0.3 to 1.7\) for men and 1.5 \(0.3 to 2.6\) for women in 2004\).](#)

**Conclusions:** These results suggest that [the proportion of people in different](#) employment statuses, particularly the [proportion in](#) sickness or disability related economic inactivity, [could play an important role in the prevalence of poor self rated health in the UK. Whether decreasing economic inactivity would enhance population health is an open question that needs further investigation.](#)

**Trial registration:** This observational study was not reregistered.

## Article summary

### Article focus

- There have been major changes in employment (particularly the growth of those out of work sick or disabled) since the 1970s in many OECD countries.
- Given that self rated health is associated strongly with employment status [the changes in employment](#) may [potentially be important for](#) the level of poor health [in the](#) population.

### Key messages

- Accounting for population increases in socio-economic [characteristics](#) associated with good health suggests that self rated health [may have](#) worsened since 1978 for both working age men and women.
- Much of this [deterioration disappeared when](#) -controlling for employment status.
- There seems to be an association between rising levels of detachment from the labour market for both men and women [\(even given the rise in women's employment\)](#) and [the level of poor](#) self rated health [in the population](#).

### Strengths and limitations

- The study uses consistent individual level data from a long term survey covering a period of -socio-economic change.
- [Further work is needed to understand whether decreasing economic inactivity would necessarily lead to improved population health.](#)

## Introduction

Since the late 1970s, there have been substantial social, political and economic changes in the UK and in other advanced market democracies. On the one hand, average levels of education and material wealth have increased in the UK since the 1970s [1] and there have been improvements to overall mortality levels and life expectancy. On the other hand, there have been increases in inequalities in wealth and health [1, 2]. Welfare provision has decreased [3] at the same time as there have been large reductions in male employment levels and a related rise in male and female (excluding keeping house) economic inactivity rates [4]. The rise of economic inactivity has been linked to the de-industrialisation experienced by the labour markets of advanced market democracies and the associated loss of full-time, permanent, well-paid and skilled industrial jobs [5].

Being out of work has consistently been associated with a heightened risk of mortality [6], mental ill-health and suicide [7, 8], unhappiness [9], poor general health [10] and limiting long term illness [11, 12]. This heightened risk of ill-health applies not just to those unemployed (out of work and actively seeking work) but also to those economically inactive (out of work and not actively seeking work) [9, 10, 13]. Indeed, previous work [suggested](#) that the distribution of economic inactivity was [a potentially](#) important factor behind the social gradient in health and in regional differences in health inequalities [10, 14].

Whilst there has been a wealth of research into the association between unemployment and adverse health, there has been much less which examines economic inactivity. Arguably, it is the latter which is of increasing importance in public health terms as whilst unemployment is generally cyclical – rising and falling in line with economic contraction and expansion – economic inactivity has increasingly become a structural labour market problem [4]. For example in the UK, according to the 1966 census 94.4% of non-student working age men were in employment and only 3% were economically inactive whilst in the 2001 census, the figures were 80.2% and 14.5% respectively [15]. [This paper examines the potential impact of the changing pattern of employment status on the prevalence of poor self rated health from 1978 to 2004 using individual level data from a repeated](#) cross-sectional survey.

## Methods

The General Household Survey is a UK government repeated cross-sectional household survey that started in 1971 (with gaps in 1997 and 1999). [It aimed to interview all adults in selected households. The exact sampling procedures to select households have changed over time but it has employed a stratified \(by regional geography and area socio-economic characteristics\) clustered sample method with the primary sample units being small \(as a rough guide 5000 people\) geographical areas \(electoral wards until 1983 and postcode sectors thereafter\). Households were then randomly selected from within these primary sampling units.](#) It covers Britain rather than the whole of the UK (so excludes Northern Ireland). Its long running nature means that it is highly suitable for assessing change over time. The UK's Office for National Statistics (ONS) has produced a consistent (in terms of making variables as comparable as possible over time) time-series of the surveys 1972 to 2004 and it is this individual level dataset - available from the UK Data Archive - that was used in this analysis [16]. Analysis was limited to men and women aged 25 to 59. The lower age limit was chosen to limit the likelihood of people still being in higher education. Although state retirement age in the UK for the study period was 65 for men and 60 for women, it is common practice to restrict analysis to age 59 and below to limit the number of people who have taken voluntary early retirement straight from paid employment.

The health outcome was self-rated general health, with respondents asked "Over the last 12 months, would you say your health has on the whole been: good; fairly good or not good?". For this analysis, it was recoded good and fairly good health (0) versus not good (1) and this latter category is referred to as poor health from now on. The question was first asked in 1977 but the introduction to the question was different in this year so 1978 is taken as the reference year. [Individual level](#) employment status was coded as employed, unemployed (out of work but actively seeking work), and the following categories of economic inactivity: retired, in education, keeping house full-time, sick or disabled and other economically inactive. As the [employment status variables in the](#) time series file [had only three categories \(employed, unemployed and economic inactive\)](#) we returned to the original annual survey files to compile the more nuanced categories [of individual level economic inactivity](#). Single year of age was used in the analysis. Three measures of socio-economic position were used with categories made consistent [as possible](#) over time by the ONS, whether the person had a university level degree or not, whether they lived in owned outright housing, owned with mortgage housing, private rented housing or social (state or housing association) rented housing and finally, whether they lived in

1  
2  
3  
4  
5  
6  
7 a household with car access. Across all years, a total of 10% of men and 4% of women in the sample had  
8 missing data for one or more of the variables. [In sensitivity analysis we ~~used multiple~~ imputation](#)  
9 [\(implemented using the ice command in Stata\) to impute missing data. We did the imputation for men and](#)  
10 [women and for each year separately. Twenty imputed datasets were created for each year / gender](#)  
11 [combination. The imputed models were](#)-based on all variables already described plus country of residence  
12 (England, Wales, Scotland)[\) and marital status.](#)- The [main](#) results using the imputed datasets [are shown in the](#)  
13 [supplement.](#)  
14  
15  
16  
17  
18  
19

20 [For the main analysis we pooled](#) data from [all the survey years.](#) The prevalence of poor health amongst  
21 individual respondents in all other years (1979-2004) was compared to 1978 using a logistic regression model  
22 containing year dummy variables with standard errors accounting for the household clustering in the survey  
23 (although this was minimal as men and women in the same household were analysed separately). The initial  
24 model (model A) controlled for age [only. Model B additionally adjusted for the](#) socio-economic [variables](#) as  
25 these are variables associated with general health [17]. Model [C](#) then controlled additionally for employment  
26 status to assess its impact on the annual differences. [In sensitivity analysis we checked the pattern of results](#)  
27 [using multilevel models where we treated year as a random intercept \(individuals nested in years\) and these](#)  
28 [results are shown in the supplement.](#) Non-response weights are included in the time series General Household  
29 Survey file from 2000 onwards (when weights were introduced) and these have been applied in [the main](#)  
30 analysis (weights are scaled to have a mean of 1 in each year) with each individual in the years prior to 2000  
31 being weighted equally (at 1). As odds ratios across different logistic models are not directly comparable [18]  
32 we also present the [main](#) results as adjusted prevalence differences (that are comparable across models [18])  
33 by using the post estimation "margins" command in Stata. This shows [yearly](#) differences on an absolute scale.  
34  
35  
36  
37  
38  
39  
40  
41  
42  
43  
44  
45

46 [Even though each annual GHS sample is relatively large, pooling the data had the advantage of increasing the](#)  
47 [sample for certain categories of the variables \(economic inactivity for example\) that in each year were](#)  
48 [relatively small. Pooling also provided a direct test of year-on-year differences. One disadvantage is that the](#)  
49 [coefficient for the variables is assumed to be the same over the years. We tested the possible impact of](#)  
50 [allowing coefficients to vary over the years in two ways. Firstly in our multilevel modelling we fitted a random](#)  
51 [coefficient model where we allowed the coefficients for employment status to vary over the years \(models](#)  
52  
53  
54  
55  
56  
57  
58  
59  
60



1  
2  
3  
4  
5  
6  
7 allowing all variables (age, socio-economic characteristics and employment status) to vary in the multilevel  
8 model unfortunately did not converge).

9  
10 Second we used decomposition analysis to compare the observed difference in prevalence of poor health  
11 between the initial year (1978) and the final year (2004) using separate logistic regression models for each  
12 of these years. This means that the coefficients are allowed to be different between the years. This method  
13 allows the difference in prevalence of poor health to be separated into the part associated with changes in the  
14 characteristics of the population between 2004 and 1978 and that associated with changes in size of  
15 coefficients (including the intercept) between 2004 and 1978. For example, comparing an age adjusted model  
16 would mean that the prevalence difference between the two years could be assigned to changes in the effect  
17 size of the coefficients (in this case the age coefficient and the constant) and that due to changes in the age  
18 composition of the population (for example if the population had a higher average age in 2004 compared to  
19 1978). We apply the same models (A, B and C) from the main analysis. We use the mvdcmp command in Stata  
20 to conduct the decomposition [19]. Stata 11.2 was used for the analysis apart from the multilevel modelling  
21 that was conducted in MLwiN.  
22  
23  
24  
25  
26  
27  
28  
29  
30  
31

## 32 Results

33  
34 The total sample sizes across all years were 138,932 men and 145,300 women and these were reduced to  
35 125,125 and 139,535 respectively in the complete case analysis when cases with missing data were excluded.  
36 Table 1 includes the response rates and individual year sample sizes for the complete cases.

37  
38 Table 1 shows that for men the prevalence of poor health was low in 1978 (it was lowest in 1982-) and then  
39 increased to 10.7% in 2004 a rise of 3.3 percentage points over the period. The rate of poor health was lowest  
40 for women in 1984 having declined slightly from 1978, although in the 1990s the rate rose and was just over 1  
41 percentage point higher at the end of period compared to the start. The rate of poor health was always higher  
42 for women than men over the period.  
43  
44  
45  
46  
47  
48

49 There was clear change in the socio-economic characteristics of the population over the period with  
50 declines in the proportion living in social rented housing and increases in the proportion living in owner  
51 occupied housing, living in households with car access and the proportion with degrees (Figure 1).  
52  
53  
54  
55  
56  
57  
58  
59  
60

1  
2  
3  
4  
5  
6  
7  
8  
9  
10  
11  
12  
13  
14  
15  
16  
17  
18  
19  
20  
21  
22  
23  
24  
25  
26  
27  
28  
29  
30  
31  
32  
33  
34  
35  
36  
37  
38  
39  
40  
41  
42  
43  
44  
45  
46  
47  
48  
49  
50  
51  
52  
53  
54  
55  
56  
57  
58  
59  
60

Table 1 Response rates, sample sizes\*\* and prevalence\*\* of poor health for men and women by year.

| Year | Response rate* (%) | Number of men | % of men in poor health | Number of women | % of women in poor health |
|------|--------------------|---------------|-------------------------|-----------------|---------------------------|
| 1978 | 82                 | <u>6258</u>   | <u>7.4</u>              | <u>6777</u>     | <u>11.3</u>               |
| 1979 | 83                 | <u>6097</u>   | <u>8.0</u>              | <u>6557</u>     | <u>11.1</u>               |
| 1980 | 82                 | <u>6129</u>   | <u>8.7</u>              | <u>6659</u>     | <u>12.2</u>               |
| 1981 | 84                 | <u>6348</u>   | <u>7.7</u>              | <u>6860</u>     | <u>11.4</u>               |
| 1982 | 84                 | <u>5299</u>   | <u>6.9</u>              | <u>5784</u>     | <u>10.1</u>               |
| 1983 | 82                 | <u>5030</u>   | <u>7.6</u>              | <u>5618</u>     | <u>11.6</u>               |
| 1984 | 81                 | <u>4855</u>   | <u>7.6</u>              | <u>5375</u>     | <u>9.5</u>                |
| 1985 | 82                 | <u>5041</u>   | <u>7.3</u>              | <u>5542</u>     | <u>10.4</u>               |
| 1986 | 84                 | <u>5175</u>   | <u>7.4</u>              | <u>5645</u>     | <u>10.2</u>               |
| 1987 | 85                 | <u>5295</u>   | <u>7.3</u>              | <u>5739</u>     | <u>10.5</u>               |
| 1988 | 85                 | <u>5082</u>   | <u>8.0</u>              | <u>5578</u>     | <u>10.2</u>               |
| 1989 | 84                 | <u>5205</u>   | <u>7.4</u>              | <u>5677</u>     | <u>10.0</u>               |
| 1990 | 81                 | <u>4833</u>   | <u>7.8</u>              | <u>5322</u>     | <u>11.0</u>               |
| 1991 | 84                 | <u>5110</u>   | <u>7.8</u>              | <u>5614</u>     | <u>10.3</u>               |
| 1992 | 83                 | <u>5070</u>   | <u>8.1</u>              | <u>5690</u>     | <u>9.8</u>                |
| 1993 | 82                 | <u>4890</u>   | <u>7.9</u>              | <u>5434</u>     | <u>10.8</u>               |
| 1994 | 80                 | <u>4734</u>   | <u>9.6</u>              | <u>5398</u>     | <u>11.2</u>               |
| 1995 | 80                 | <u>4705</u>   | <u>10.6</u>             | <u>5488</u>     | <u>11.4</u>               |
| 1996 | 76                 | <u>4326</u>   | <u>8.0</u>              | <u>5111</u>     | <u>11.4</u>               |
| 1998 | 72                 | <u>4044</u>   | <u>11.3</u>             | <u>4740</u>     | <u>12.3</u>               |
| 2000 | 67                 | <u>4008</u>   | <u>10.1</u>             | <u>4548</u>     | <u>12.2</u>               |
| 2001 | 72                 | <u>4358</u>   | <u>10.3</u>             | <u>5058</u>     | <u>12.1</u>               |
| 2002 | 69                 | <u>4183</u>   | <u>11.1</u>             | <u>4818</u>     | <u>12.0</u>               |
| 2003 | 70                 | <u>4885</u>   | <u>10.1</u>             | <u>5651</u>     | <u>12.5</u>               |
| 2004 | 69                 | <u>4165</u>   | <u>10.7</u>             | <u>4852</u>     | <u>12.8</u>               |

\*Response rates are from <http://www.esds.ac.uk/doc/5640/mrdoc/pdf/5640ghs05appendixb.pdf> (page 10)

\*\* Sample size and prevalence of poor health for the complete case sample.

Taking these developments in the socio-economic characteristics of the population into account by controlling for the socio-economic variables in model B generally increased annual differences compared to 1978 when model B is compared to model A which controlled only for age differences.

Overall male employment had fallen from 93% to 85% at the end of the period. Figure 2 illustrates the changes in the proportion of people in the various non-employment statuses over time with male unemployment (left panel) being cyclical, peaking in the mid 1980s and the early 1990s recession then falling away and being over taken by those sick or disabled in the late 1990s with this group now being the largest. Other forms of economic inactivity for males showed some increases but remained relatively small. For women, figure 2 (right panel) shows (reading the right hand axis) that there had been a 20 percentage point decline in those keeping home but, as for men, cyclical unemployment, a rise in those sick or disabled

1  
2  
3  
4  
5  
6 overtaking those unemployed and a rise in those retired or in education. However unlike for men, female  
7 employment rose by 13 percentage points over the period from 61% to 74%  
8  
9  
10  
11  
12  
13  
14  
15  
16  
17  
18  
19  
20  
21  
22  
23  
24  
25  
26  
27  
28  
29  
30  
31  
32  
33  
34  
35  
36  
37  
38  
39  
40  
41  
42  
43  
44  
45  
46  
47  
48  
49  
50  
51  
52  
53  
54  
55  
56  
57  
58  
59  
60

For peer review only

1  
2  
3  
4  
5  
6  
7  
8  
9  
10  
11  
12  
13  
14  
15  
16  
17  
18  
19  
20  
21  
22  
23  
24  
25  
26  
27  
28  
29  
30  
31  
32  
33  
34  
35  
36  
37  
38  
39  
40  
41  
42  
43  
44  
45  
46  
47  
48  
49

Table 2 Logistic regression results for rate of poor health for men and women controlling for age (Model A), additionally the listed socio-economic characteristics (model B) and additionally employment status (Model C)

|      | Men (Model A)<br>ORs (95% CIs) | Men (Model B)<br>ORs (95% CIs) | Men (Model C)<br>ORs (95% CIs) | Women (Model A)<br>ORs (95% CIs) | Women (Model B)<br>ORs (95% CIs) | Women (Model C)<br>ORs (95% CIs) |
|------|--------------------------------|--------------------------------|--------------------------------|----------------------------------|----------------------------------|----------------------------------|
| Age  | <u>1.06 (1.05 to 1.06)</u>     | <u>1.05 (1.05 to 1.06)</u>     | <u>1.04 (1.04 to 1.04)</u>     | <u>1.04 (1.03 to 1.04)</u>       | <u>1.03 (1.03 to 1.04)</u>       | <u>1.03 (1.02 to 1.03)</u>       |
| Year |                                |                                |                                |                                  |                                  |                                  |
| 1978 | <u>1</u>                       | <u>1</u>                       | <u>1</u>                       | <u>1</u>                         | <u>1</u>                         | <u>1</u>                         |
| 1979 | <u>1.08 (0.94 to 1.24)</u>     | <u>1.09 (0.95 to 1.25)</u>     | <u>1.02 (0.89 to 1.18)</u>     | <u>0.98 (0.88 to 1.09)</u>       | <u>0.98 (0.88 to 1.1)</u>        | <u>0.98 (0.88 to 1.1)</u>        |
| 1980 | <u>1.2 (1.05 to 1.37)</u>      | <u>1.24 (1.08 to 1.42)</u>     | <u>1.14 (0.99 to 1.31)</u>     | <u>1.09 (0.98 to 1.21)</u>       | <u>1.11 (1 to 1.24)</u>          | <u>1.13 (1.01 to 1.26)</u>       |
| 1981 | <u>1.05 (0.92 to 1.21)</u>     | <u>1.09 (0.95 to 1.25)</u>     | <u>0.95 (0.83 to 1.1)</u>      | <u>1.01 (0.91 to 1.13)</u>       | <u>1.04 (0.93 to 1.16)</u>       | <u>1.02 (0.91 to 1.14)</u>       |
| 1982 | <u>0.93 (0.81 to 1.08)</u>     | <u>0.99 (0.85 to 1.15)</u>     | <u>0.8 (0.68 to 0.93)</u>      | <u>0.89 (0.79 to 1)</u>          | <u>0.93 (0.83 to 1.04)</u>       | <u>0.9 (0.8 to 1.01)</u>         |
| 1983 | <u>1.03 (0.89 to 1.19)</u>     | <u>1.12 (0.96 to 1.29)</u>     | <u>0.83 (0.71 to 0.97)</u>     | <u>1.04 (0.93 to 1.16)</u>       | <u>1.12 (1 to 1.26)</u>          | <u>1.03 (0.91 to 1.16)</u>       |
| 1984 | <u>1.07 (0.92 to 1.23)</u>     | <u>1.24 (1.07 to 1.44)</u>     | <u>0.91 (0.78 to 1.06)</u>     | <u>0.84 (0.74 to 0.95)</u>       | <u>0.94 (0.83 to 1.06)</u>       | <u>0.85 (0.75 to 0.96)</u>       |
| 1985 | <u>1.01 (0.88 to 1.17)</u>     | <u>1.17 (1.01 to 1.36)</u>     | <u>0.81 (0.69 to 0.95)</u>     | <u>0.94 (0.83 to 1.05)</u>       | <u>1.06 (0.94 to 1.19)</u>       | <u>0.94 (0.84 to 1.06)</u>       |
| 1986 | <u>1.03 (0.89 to 1.19)</u>     | <u>1.27 (1.09 to 1.47)</u>     | <u>0.89 (0.76 to 1.04)</u>     | <u>0.92 (0.82 to 1.03)</u>       | <u>1.06 (0.95 to 1.2)</u>        | <u>0.96 (0.85 to 1.08)</u>       |
| 1987 | <u>1.01 (0.88 to 1.17)</u>     | <u>1.3 (1.12 to 1.5)</u>       | <u>0.88 (0.76 to 1.03)</u>     | <u>0.95 (0.85 to 1.06)</u>       | <u>1.13 (1 to 1.27)</u>          | <u>0.98 (0.87 to 1.11)</u>       |
| 1988 | <u>1.11 (0.96 to 1.27)</u>     | <u>1.43 (1.24 to 1.65)</u>     | <u>0.99 (0.85 to 1.15)</u>     | <u>0.91 (0.81 to 1.02)</u>       | <u>1.09 (0.97 to 1.23)</u>       | <u>0.98 (0.87 to 1.1)</u>        |
| 1989 | <u>1.01 (0.87 to 1.16)</u>     | <u>1.33 (1.15 to 1.54)</u>     | <u>0.84 (0.72 to 0.99)</u>     | <u>0.9 (0.8 to 1.01)</u>         | <u>1.1 (0.97 to 1.23)</u>        | <u>0.95 (0.84 to 1.07)</u>       |
| 1990 | <u>1.1 (0.95 to 1.26)</u>      | <u>1.47 (1.27 to 1.7)</u>      | <u>0.91 (0.77 to 1.06)</u>     | <u>1 (0.89 to 1.12)</u>          | <u>1.22 (1.09 to 1.38)</u>       | <u>1.06 (0.93 to 1.19)</u>       |
| 1991 | <u>1.08 (0.94 to 1.24)</u>     | <u>1.43 (1.23 to 1.65)</u>     | <u>0.86 (0.74 to 1.01)</u>     | <u>0.93 (0.83 to 1.04)</u>       | <u>1.15 (1.02 to 1.29)</u>       | <u>0.93 (0.82 to 1.05)</u>       |
| 1992 | <u>1.11 (0.97 to 1.28)</u>     | <u>1.51 (1.31 to 1.75)</u>     | <u>0.85 (0.73 to 0.99)</u>     | <u>0.87 (0.77 to 0.98)</u>       | <u>1.09 (0.97 to 1.23)</u>       | <u>0.85 (0.75 to 0.97)</u>       |
| 1993 | <u>1.11 (0.96 to 1.28)</u>     | <u>1.52 (1.31 to 1.76)</u>     | <u>0.79 (0.67 to 0.92)</u>     | <u>0.98 (0.88 to 1.1)</u>        | <u>1.23 (1.09 to 1.38)</u>       | <u>0.95 (0.84 to 1.08)</u>       |
| 1994 | <u>1.35 (1.17 to 1.55)</u>     | <u>1.85 (1.61 to 2.13)</u>     | <u>0.97 (0.83 to 1.13)</u>     | <u>1.02 (0.91 to 1.15)</u>       | <u>1.28 (1.13 to 1.43)</u>       | <u>1.01 (0.89 to 1.14)</u>       |
| 1995 | <u>1.5 (1.31 to 1.71)</u>      | <u>2.11 (1.84 to 2.43)</u>     | <u>1.1 (0.94 to 1.27)</u>      | <u>1.03 (0.92 to 1.15)</u>       | <u>1.34 (1.19 to 1.5)</u>        | <u>1.02 (0.91 to 1.16)</u>       |

Formatted Table

|                     |                            |                            |                               |                            |                            |                               |
|---------------------|----------------------------|----------------------------|-------------------------------|----------------------------|----------------------------|-------------------------------|
| 1996                | <u>1.11 (0.96 to 1.29)</u> | <u>1.53 (1.32 to 1.78)</u> | <u>0.71 (0.6 to 0.84)</u>     | <u>1.03 (0.92 to 1.16)</u> | <u>1.31 (1.16 to 1.47)</u> | <u>0.94 (0.83 to 1.06)</u>    |
| 1998                | <u>1.61 (1.4 to 1.85)</u>  | <u>2.31 (2 to 2.66)</u>    | <u>1.22 (1.05 to 1.43)</u>    | <u>1.11 (0.99 to 1.25)</u> | <u>1.47 (1.3 to 1.65)</u>  | <u>1.07 (0.94 to 1.21)</u>    |
| 2000                | <u>1.43 (1.24 to 1.65)</u> | <u>2.06 (1.78 to 2.39)</u> | <u>1.04 (0.88 to 1.23)</u>    | <u>1.1 (0.98 to 1.24)</u>  | <u>1.47 (1.3 to 1.66)</u>  | <u>1.1 (0.97 to 1.25)</u>     |
| 2001                | <u>1.47 (1.27 to 1.69)</u> | <u>2.13 (1.85 to 2.46)</u> | <u>1.13 (0.97 to 1.32)</u>    | <u>1.08 (0.96 to 1.21)</u> | <u>1.46 (1.3 to 1.64)</u>  | <u>1.05 (0.93 to 1.2)</u>     |
| 2002                | <u>1.53 (1.33 to 1.76)</u> | <u>2.25 (1.95 to 2.59)</u> | <u>1.3 (1.11 to 1.52)</u>     | <u>1.07 (0.95 to 1.2)</u>  | <u>1.45 (1.28 to 1.63)</u> | <u>1.09 (0.96 to 1.24)</u>    |
| 2003                | <u>1.38 (1.2 to 1.58)</u>  | <u>2.03 (1.76 to 2.34)</u> | <u>1.08 (0.93 to 1.27)</u>    | <u>1.11 (0.99 to 1.24)</u> | <u>1.5 (1.34 to 1.69)</u>  | <u>1.12 (0.99 to 1.27)</u>    |
| 2004                | <u>1.44 (1.25 to 1.66)</u> | <u>2.09 (1.81 to 2.41)</u> | <u>1.11 (0.95 to 1.31)</u>    | <u>1.14 (1.01 to 1.27)</u> | <u>1.56 (1.38 to 1.75)</u> | <u>1.18 (1.04 to 1.33)</u>    |
| No degree           |                            | <u>1</u>                   | <u>1</u>                      |                            | <u>1</u>                   | <u>1</u>                      |
| Degree              |                            | <u>0.49 (0.45 to 0.54)</u> | <u>0.59 (0.54 to 0.65)</u>    |                            | <u>0.56 (0.51 to 0.61)</u> | <u>0.66 (0.6 to 0.72)</u>     |
| Owned outright      |                            | <u>1</u>                   | <u>1</u>                      |                            | <u>1</u>                   | <u>1</u>                      |
| Owned with mortgage |                            | <u>0.75 (0.7 to 0.8)</u>   | <u>0.95 (0.89 to 1.02)</u>    |                            | <u>0.97 (0.92 to 1.03)</u> | <u>1.1 (1.03 to 1.16)</u>     |
| Private rent        |                            | <u>1.15 (1.05 to 1.26)</u> | <u>1.2 (1.08 to 1.33)</u>     |                            | <u>1.31 (1.21 to 1.42)</u> | <u>1.31 (1.2 to 1.42)</u>     |
| Social rent         |                            | <u>1.88 (1.76 to 2.01)</u> | <u>1.46 (1.35 to 1.58)</u>    |                            | <u>1.98 (1.87 to 2.1)</u>  | <u>1.72 (1.62 to 1.83)</u>    |
| No car              |                            | <u>1</u>                   | <u>1</u>                      |                            | <u>1</u>                   | <u>1</u>                      |
| Car                 |                            | <u>0.54 (0.51 to 0.57)</u> | <u>0.85 (0.8 to 0.91)</u>     |                            | <u>0.6 (0.58 to 0.63)</u>  | <u>0.73 (0.69 to 0.76)</u>    |
| Employed            |                            |                            | <u>1</u>                      |                            |                            | <u>1</u>                      |
| Unemployed          |                            |                            | <u>2.01 (1.86 to 2.18)</u>    |                            |                            | <u>1.81 (1.65 to 1.98)</u>    |
| Keeping house       |                            |                            | <u>2.64 (2.16 to 3.23)</u>    |                            |                            | <u>1.81 (1.74 to 1.89)</u>    |
| Sick or disabled    |                            |                            | <u>28.07 (26.11 to 30.19)</u> |                            |                            | <u>20.05 (18.68 to 21.52)</u> |
| Education           |                            |                            | <u>1.85 (1.33 to 2.58)</u>    |                            |                            | <u>1.26 (0.96 to 1.65)</u>    |
| Retired             |                            |                            | <u>2.59 (2.2 to 3.04)</u>     |                            |                            | <u>2.12 (1.88 to 2.4)</u>     |
| Other inactive      |                            |                            | <u>6.28 (5.46 to 7.21)</u>    |                            |                            | <u>4.04 (3.44 to 4.75)</u>    |

1  
2  
3  
4  
5  
6  
7  
8  
9 All forms of non employment were associated with an [elevated](#) probability of poor health but those sick or  
10 disabled had a particularly strong association ([Table 2 – Model C](#)). Controlling for [individual level](#) employment  
11 status (model [C](#) in table 2) attenuated the [odds ratios for poor health for the years subsequent to 1978](#) for  
12 men and women. [Pseudo r2 statistics indicated that model fit improved from model A \(age only- 0.04 & 0.02](#)  
13 [form men and women respectively\) to model B \(plus socio-economic characteristics – 0.09 & 0.05\) to model C](#)  
14 [\(plus employment – 0.22 & 0.13\) for men and women respectively. Absolute prevalence differences compared](#)  
15 [to 1978 from each model are illustrated for men and women in figures 3 and 4 respectively. These highlight](#)  
16 [the possible linear increase in poor health year-on-year after controlling for socio-economic characteristics](#)  
17 [\(Model B\) and the attenuating impact of controlling for employment status \(Model C\). For men controlling for](#)  
18 [employment status led to yearly differences from 1978 being lower than for the age only model whereas for](#)  
19 [women it led to differences being very similar to the age only model. In the supplement results from the](#)  
20 [multiple imputation are shown and are very similar to those in Figure 3 and Figure 4. Results \(shown in the](#)  
21 [supplement\) from the multilevel modelling where year was treated as a random intercept rather than a fixed](#)  
22 [covariate showed a very similar pattern in that a clearer year-on-year increase in poor health from 1978 is](#)  
23 [apparent in model B compared to model A and that adjustment for employment status \(model C\) attenuated](#)  
24 [these differences even when the effect of employment status was allowed to vary over the years \(model D\).](#)

25  
26  
27  
28  
29  
30  
31  
32  
33  
34  
35  
36  
37  
38 [The results from the decomposition analysis comparing – using separate logistic regression for each year - the](#)  
39 [unadjusted observed prevalence difference between 2004 and 1978 are presented in Table 3. For men,](#)  
40 [prevalence was 3.3 percentage points higher in 2004 \(as shown in Table 1\). When adding age only to the](#)  
41 [model \(Model A\) most of the observed difference was not due into changes in the population characteristics](#)  
42 [\(the population in 2004 was slightly older hence a small part \(0.4 percentage points\) of the increase was due to](#)  
43 [this\). Socio-economic characteristics of the population had changed in 2004 \(Figure 1\) and, model B shows that](#)  
44 [health in 2004 could have been considerably better \(-4.2 percentage points lower\) given the socio-economic](#)  
45 [characteristics in 2004 compared to 1978. Instead it was the changes in the coefficients that were associated](#)  
46 [with the actual increase in poor health from 1978 to 2004. However, when employment status is added in](#)  
47 [model C most of the increase in poor health is now explained by the change in population characteristics from](#)  
48  
49  
50  
51  
52  
53  
54  
55  
56  
57  
58  
59  
60

1  
2  
3  
4  
5  
6  
7 [1978 to 2004. For women, the pattern of results is similar to men for the smaller 1.5 percentage point increase](#)  
8 [in poor health in 2004 although in model C most of the change is due to changes in coefficients. These results](#)  
9 [reflect those of the main analysis where controlling for both our socio-economic and employment status](#)  
10 [variables suggested that for men the difference between 2004 and 1978 would have been slightly lower than](#)  
11 [the age adjusted difference and for women it would have been very similar.](#)  
12  
13  
14

15  
16  
17 [Table 3 Results for the decomposition analysis for the prevalence difference in poor health in 2004 from 1978](#)  
18 [for men and women – model A adjusts for age, model B additionally adjusts for housing tenure, car access and](#)  
19 [degree attainment, model C adjusts additionally for employment](#)  
20

|                           | Model A -- Prevalence difference and 95% CIs* | Model B             | Model C            |
|---------------------------|-----------------------------------------------|---------------------|--------------------|
| Men                       |                                               |                     |                    |
| Due to population change  | 0.4 (0.4 to 0.5)                              | -4.2 (-5 to -3.5)   | 2.4 (1.7 to 3.2)   |
| Due to coefficient change | 2.8 (1.7 to 4.0)                              | 7.5 (6.0 to 9.0)    | 0.8 (-0.5 to 2.1)  |
| Overall difference        | 3.3 (2.1 to 4.4)                              | 3.3 (2.2 to 4.4)    | 3.3 (2.3 to 4.3)   |
| Women                     |                                               |                     |                    |
| Due to population change  | 0.2 (.2 to .3)                                | -4.4 (-5.2 to -3.7) | -0.1 (-0.9 to 0.8) |
| Due to coefficient change | 1.3 (0.1 to 2.5)                              | 5.9 (4.4 to 7.5)    | 1.6 (0.1 to 3.1)   |
| Overall Difference        | 1.5 (0.3 to 2.7)                              | 1.5 (0.3 to 2.7)    | 1.5 (0.4 to 2.6)   |

21  
22  
23  
24  
25  
26  
27  
28  
29  
30 [\\*Confidence intervals do not account for household clustering as this option is not presently available for](#)  
31 [mvdcmp](#)  
32  
33  
34  
35  
36  
37  
38  
39  
40  
41  
42  
43  
44  
45  
46  
47  
48  
49  
50  
51  
52  
53  
54  
55  
56  
57  
58  
59  
60

## Discussion

The individual level analysis presented here shows [that accounting for shifts in the proportion of the working age population in different employment statuses](#) – most notably the rise of sickness or disability related economic inactivity – [attenuated annual differences in the](#) prevalence of poor self rated health in the UK population since the late 1970s. This complements previous [individual level analysis](#) into sickness or disability related economic inactivity which found that it was a possible major factor behind the social gradient in health [14] as well as a [possible](#) influential issue in regional differences in health [10]. [The results](#) suggest that [a fuller understanding of why employment status is associated with self-rated health could be important for public health. The relationship between employment status and health is complicated. Systematic reviews have concluded that there is evidence that poor health can cause job loss and that job loss can cause poor health with the latter possibly being the stronger effect of the two \[6, 7\]. For self-rated general health, there is also evidence of health selection \[20\] but also causation \[21\]. So it is possible that rising rates of poor general health have increased economic inactivity. The debate over the relative influence of employment on health versus health on employment is limited though because it tends to emphasise notions of people being in a state of health that either allows them to work or not: a zero-sum approach. Yet, it should be remembered that ill health for the majority is not an impediment to labour market participation \[22\] but that those in ill-health - particularly in lower socio-economic positions - are most vulnerable to non-employment and were increasingly so in the period under study \[22, 23\]. So their job loss may not then be caused by their ill-health per se but by the prevailing labour market conditions and the policy response to these \[24, 25\].](#)

Evidence suggests that the increases in the economically inactive population (particularly those claiming sickness related benefits) in the [UK during this period were due to difficult labour market conditions \(particularly in de-industrialised areas\) \[5\] \[26\]. This resulted in those with health conditions \(particularly if also from low socio-economic positions\) finding themselves towards the back of the job queue and unlikely to find employment \[5\]. In this sense it is argued that many of those economically inactive because of sickness or disability are “hidden unemployed” as they may be employed given different labour market conditions.](#) [5].

Field Code Changed



1  
2  
3  
4  
5  
6  
7 Indeed, in better labour market [conditions](#) it is argued that there is “hidden sickness” amongst the active  
8 workforce [5]. This does not necessarily require any change in the individual level of ill-health in the population  
9 just change in the proportion of people who are employed. Recent theoretical work on how people self-rate  
10 their general health suggests a cognitive process where people take account of their individual health situation  
11 but do so in the wider context in which they live [27]. Hence the assessment of one’s health while being  
12 economically inactive may differ compared to when one is in or seeking work. [For example, there is](#)  
13 [longitudinal evidence that the reporting of longstanding illness may depend on labour market status with](#)  
14 [employment reducing the likelihood of reporting poor health](#) [28]. Coupled to the health damaging  
15 psychological and material consequences of non-work [29] this may allow us to understand why economic  
16 inactivity may [be associated](#) with a higher risk of poor general health [at the individual level](#).

17  
18  
19  
20  
21  
22  
23 Of course, confounding [is a](#) real possibility within this repeated cross-sectional study. For example, there could  
24 be other confounding or mediating trends that are associated with both general health and employment that  
25 could explain the impact of adjusting for changes in employment status. Examples include the apparent  
26 decline in job quality over time [30] and macro-economic changes such as the rise in the level of income  
27 inequality.

28  
29  
30  
31  
32  
33  
34 Economic inactivity is also a [potentially](#) important influence on population health, not just because of the  
35 composition of the inactive population itself, but also because it is generally a longer term state. For example,  
36 a recent cohort study of people out of work and in receipt of incapacity-related benefits in the UK found that  
37 the average length of economic inactivity amongst this group was nine years [31]. Thus the issues which are  
38 usually put forward to explain the association between unemployment and ill health – most notably poverty,  
39 social exclusion and low social status – are thus experienced for a much longer time period by those who are  
40 inactive than by those who are unemployed.

41  
42  
43  
44  
45  
46  
47 Whilst our results suggest that decreasing the numbers of economically inactive [could](#) have health benefits,  
48 this is by no means an easy task and not just because of the current economic climate. Research into welfare  
49 to work interventions for those with a disability or chronic illness has found that even in times of solid  
50 economic growth it is very difficult to increase the employment rate of this group. For example, in the UK since  
51 the 1990s there have been increasing efforts to enhance the labour market participation of this group using  
52  
53  
54  
55  
56  
57  
58  
59  
60

1  
2  
3  
4  
5  
6  
7 various interventions including education, training and work placement schemes; vocational advice and  
8 support services; vocational rehabilitation; in-work benefits; financial incentives for employers; employment  
9 rights legislation and accessibility interventions[4]. However, the evidence of effectiveness in terms of actually  
10 increasing employment is very limited [4, 32-34]. This is partly attributed to the largely supply-side orientation  
11 of most of the interventions [4], the focus on employment rather than health improvement [31, 35] and the  
12 lack of demand from employers for workers with complicated and fluctuating health conditions [31].  
13  
14

15  
16 In addition to being only cross-sectional, another limitation of using the General Household Survey is that  
17 response rate fell over time; weighting was introduced in 2000 and we have applied this in all analysis but the  
18 possibility remains that the survey became increasingly unrepresentative over time. It is impossible to assess  
19 the impact of this on our results as we do not have details of non responders. However, evidence comparing a  
20 national census to a national health survey suggested that low socio-economic groups and the out of work  
21 were less well represented in the survey leading to a more conservative estimate of the social gradient in  
22 health in the survey [36].  
23  
24  
25  
26  
27  
28  
29

### 30 Conclusion

31  
32 To summarise, this study shows that poor health may have worsened amongst both men and women from  
33 1978 to 2004 when accounting for socio-economic changes. However, controlling for the employment status  
34 changes in the UK since 1978 attenuated the increase in poor general health. This research raises important  
35 public policy issues around the role of employment in overall public health which should be examined further.  
36  
37  
38

### 39 Acknowledgements

40 General Household Survey Time Series Dataset 1972-2004 was created by the Office for National Statistics. The  
41 user guide for the time series dataset was created jointly by ONS and the Economic and Social Data Service  
42 (ESDS) Government and downloaded from the UK Data Archive. The data are Crown copyright. The authors  
43 alone are responsible for the analysis and interpretation.  
44  
45  
46

### 47 Funding

48  
49 No specific grant was associated with this work. LG (5TK30) and FP (5TK10) are funded by the MRC  
50  
51

### 52 Ethics approval

53 Not required for this secondary analysis of publically available and anonymised secondary data  
54  
55  
56  
57  
58  
59  
60

### Author contributions

FP had the original idea which was developed with CB. FP and LG conducted the analysis. FP drafted the manuscript with revisions from CB and LG.

### References

- 1 Dorling D, Rees P. A nation still dividing: the British census and social polarisation 1971 - 2001. *Environ Plan A* 2003;**35**:1287-313.
- 2 Thomas B, Dorling D, Davey Smith G. Inequalities in premature mortality in Britain: observational study from 1921 to 2007. *BMJ* 2010;**341**:c3639.
- 3 Eikemo TA, Bambra C. The welfare state: a glossary for public health. *J Epidemiol Community Health* 2008;**62**:3-6.
- 4 Bambra C. *Work, Worklessness, and the Political Economy of Health*. Oxford: Oxford University Press 2011.
- 5 Beatty C. A Theory of Employment, Unemployment and Sickness. *Reg Stud* 2000;**34**:617-30.
- 6 Roelfs DJ, Shor E, Davidson KW, et al. Losing life and livelihood: A systematic review and meta-analysis of unemployment and all-cause mortality. *Soc Sci Med* 2011;**72**:840-54.
- 7 Paul KI, Moser K. Unemployment impairs mental health: Meta-analyses. *J Vocat Behav* 2009;**74**:264-82.
- 8 Welch SS. A review of the literature on the epidemiology of parasuicide in the general population. *Psychiatr Serv* 2001;**52**:368.
- 9 Blanchflower D, Oswald A. International Happiness. *The Academy of Management Perspectives (formerly The Academy of Management Executive) (AMP)* 2011;**25**:6-22.
- 10 Bambra C, Popham F. Worklessness and regional differences in the social gradient in general health: Evidence from the 2001 English census. *Health Place* 2010;**16**:1014-21.
- 11 Bartley M, Plewis I. Accumulated labour market disadvantage and limiting long-term illness: data from the 1971-1991 Office for National Statistics' Longitudinal Study. *Int J Epidemiol* 2002;**31**:336-41.
- 12 Korpi T. Accumulating Disadvantage. Longitudinal Analyses of Unemployment and Physical Health in Representative Samples of the Swedish Population. *European Sociological Review* 2001;**17**:255-73.
- 13 Clemens T, Boyle P, Popham F. Unemployment, mortality and the problem of health-related selection: evidence from the Scottish and England & Wales (ONS) longitudinal studies. *Health Stat Q* 2009:7-13.
- 14 Popham F, Bambra C. Evidence from the 2001 English Census on the contribution of employment status to the social gradient in self-rated health. *J Epidemiol Community Health* 2010;**64**:277-80.
- 15 MacKay RR, Davies L. Unemployment, permanent sickness, and nonwork in the United Kingdom. *Environ Plan A* 2007;**40**:464-81.
- 16 User Guide for the General Household Survey (GHS) Time Series Dataset 1972 to 2004 (suitable for pseudo-cohort analysis). [http://www.esds.ac.uk/doc/5664%5Cmrdoc%5Cpdf%5C5664\\_ghs\\_time\\_series\\_user\\_guide.pdf](http://www.esds.ac.uk/doc/5664%5Cmrdoc%5Cpdf%5C5664_ghs_time_series_user_guide.pdf)
- 17 Macintyre S, McKay L, Der G, et al. Socio-economic position and health: what you observe depends on how you measure it. *J Public Health* 2003;**25**:288-94.
- 18 Mood C. Logistic Regression: Why We Cannot Do What We Think We Can Do, and What We Can Do About It. *Eur Sociol Rev* 2010;**26**:67-82.
- 19 Powers DA, Yoshioka H, Yun MS. mvdcmp: Multivariate decomposition for nonlinear response models. *Stata Journal* 2011;**11**:556.
- 20 Ki M, Sacker A, Kelly Y, et al. Health selection operating between classes and across employment statuses. *J Epidemiol Community Health* 2011;**65**:1132-9.
- 21 Sacker A, Wiggins RD, Bartley M, et al. Self-Rated Health Trajectories in the United States and the United Kingdom: A Comparative Study. *Am J Public Health* 2007;**97**:812-8.
- 22 Bartley M, Owen C. Relation between socioeconomic status, employment, and health during economic change, 1973-93. *BMJ* 1996;**313**:445-9.
- 23 Minton JW, Pickett KE, Dorling D. Health, employment, and economic change, 1973-2009: repeated cross sectional study. *BMJ* 2012;**344**.

- 1  
2  
3  
4  
5  
6  
7 24 Holland P, Burström B, Whitehead M, *et al.* How Do Macro-Level Contexts and Policies Affect the  
8 Employment Chances of Chronically Ill and Disabled People? Part I: The Impact of Recession and  
9 Deindustrialization. *Int J Health Serv* 2011;**41**:395-413.
- 10 25 Holland P, Nylén L, Thielen K, *et al.* How Do Macro-Level Contexts and Policies Affect the Employment  
11 Chances of Chronically Ill and Disabled People? Part II: The Impact of Active and Passive Labor Market Policies.  
12 *Int J Health Serv* 2011;**41**:415-30.
- 13 26 Beatty C, Fothergill S, Houston D, *et al.* A gendered theory of employment, unemployment, and  
14 sickness. *Environ Plan C* 2009;**27**:958-74.
- 15 27 Jylhä M. What is self-rated health and why does it predict mortality? Towards a unified conceptual  
16 model. *Soc Sci Med* 2009;**69**:307-16.
- 17 28 Bartley M, Sacker A, Clarke P. Employment status, employment conditions, and limiting illness:  
18 prospective evidence from the British household panel survey 1991-2001. *J Epidemiol Community Health*  
19 2004;**58**:501-6.
- 20 29 Bartley M, Ferrie J, Montgomery SM. Health and labour market disadvantage: unemployment, non-  
21 employment, and job insecurity. In: Marmot M, Wilkinson RG, eds. *Social determinants of health*. Oxford:  
22 Oxford University Press 2006:78-96.
- 23 30 Clark AE. Your Money or Your Life: Changing Job Quality in OECD Countries. *Br J Ind Relat*  
24 2005;**43**:377-400.
- 25 31 Warren J, Garthwaite K, Bambra C. 'A health problem? Health and employability in the UK labour  
26 market'. In: Houston D, Lindsay C, eds. *Disability Benefits and Employment Policy: Fit for Work? Fit for Purpose?*  
27 London: Palgrave in press.
- 28 32 Clayton S, Bambra C, Gosling R, *et al.* Assembling the evidence jigsaw: insights from a systematic  
29 review of UK studies of individual-focused return to work initiatives for disabled and long-term ill people. *BMC*  
30 *Public Health* 2011;**11**:170.
- 31 33 Bambra C, Whitehead M, Hamilton V. Does 'welfare-to-work' work? A systematic review of the  
32 effectiveness of the UK's welfare-to-work programmes for people with a disability or chronic illness. *Soc Sci*  
33 *Med* 2005;**60**:1905-18.
- 34 34 Barr B, Clayton S, Whitehead M, *et al.* To what extent have relaxed eligibility requirements and  
35 increased generosity of disability benefits acted as disincentives for employment? A systematic review of  
36 evidence from countries with well-developed welfare systems. *J Epidemiol Community Health* 2010;**64**:1106-  
37 14.
- 38 35 Bambra C. Doctors are key to welfare reform. *BMJ* 2010;**341**.
- 39 36 Lorant V, Demarest S, Miermans PJ, *et al.* Survey error in measuring socio-economic risk factors of  
40 health status: a comparison of a survey and a census. *Int J Epidemiol* 2007;**36**:1292-9.
- 41  
42  
43  
44  
45  
46  
47  
48  
49  
50  
51  
52  
53  
54  
55  
56  
57  
58  
59  
60

1  
2  
3  
4  
5  
6  
7 Figure 1 Prevalence of housing tenure types, car access and degree attainment 1978 to 2004 for men and  
8 women aged 25 to 59  
9

10 Figure 2 Prevalence of the different types of employment status 1978 to 2004 from men and women aged 25  
11 to 59  
12

13 **Figure 3 Prevalence difference in poor health from 1978 (reference) to 2004 for men from model A (age  
14 adjusted), model B (plus adjustment for socio-economic characteristics) and model C (plus adjustment for  
15 employment status).**  
16

17 **Figure 4 Prevalence difference in poor health from 1978 (reference) to 2004 for women from model A (age  
18 adjusted), model B (plus adjustment for socio-economic characteristics) and model C (plus adjustment for  
19 employment status).**  
20  
21  
22  
23  
24  
25  
26  
27  
28  
29  
30  
31  
32  
33  
34  
35  
36  
37  
38  
39  
40  
41  
42  
43  
44  
45  
46  
47  
48  
49  
50  
51  
52  
53  
54  
55  
56  
57  
58  
59  
60

1  
2  
3  
4  
5  
6  
7  
8  
9  
10  
11  
12  
13  
14  
15  
16  
17  
18  
19  
20  
21  
22  
23  
24  
25  
26  
27  
28  
29  
30  
31  
32  
33  
34  
35  
36  
37  
38  
39  
40  
41  
42  
43  
44  
45  
46  
47  
48  
49  
50  
51  
52  
53  
54  
55  
56  
57  
58  
59  
60

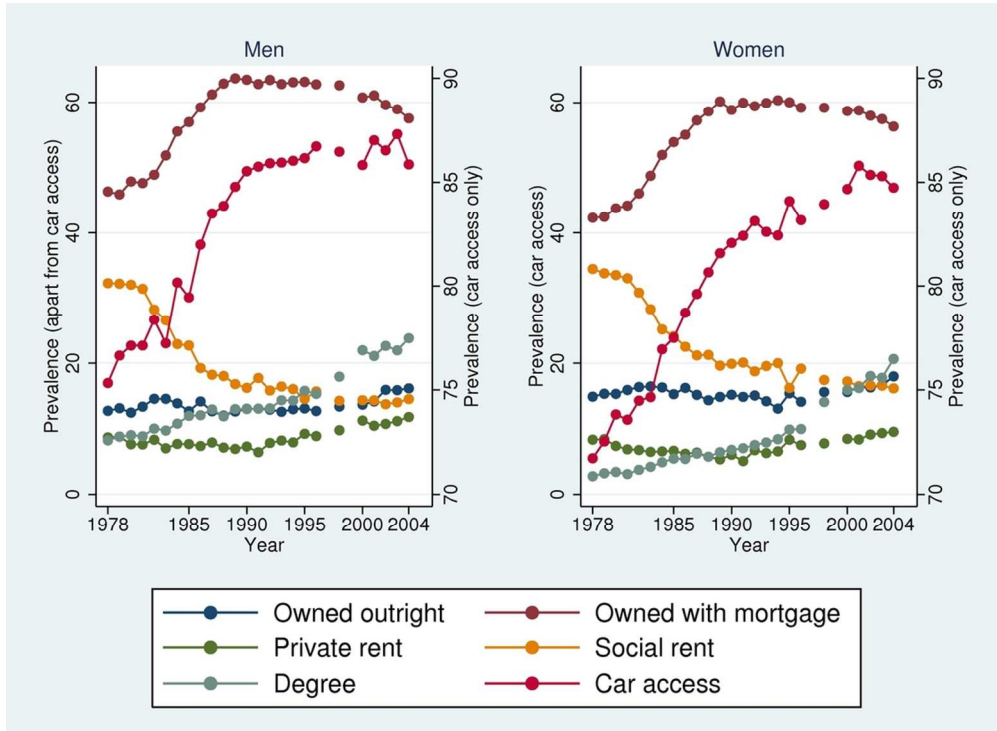

Figure 1 Prevalence of housing tenure types, car access and degree attainment 1978 to 2004 for men and women aged 25 to 59  
101x73mm (300 x 300 DPI)

Review only

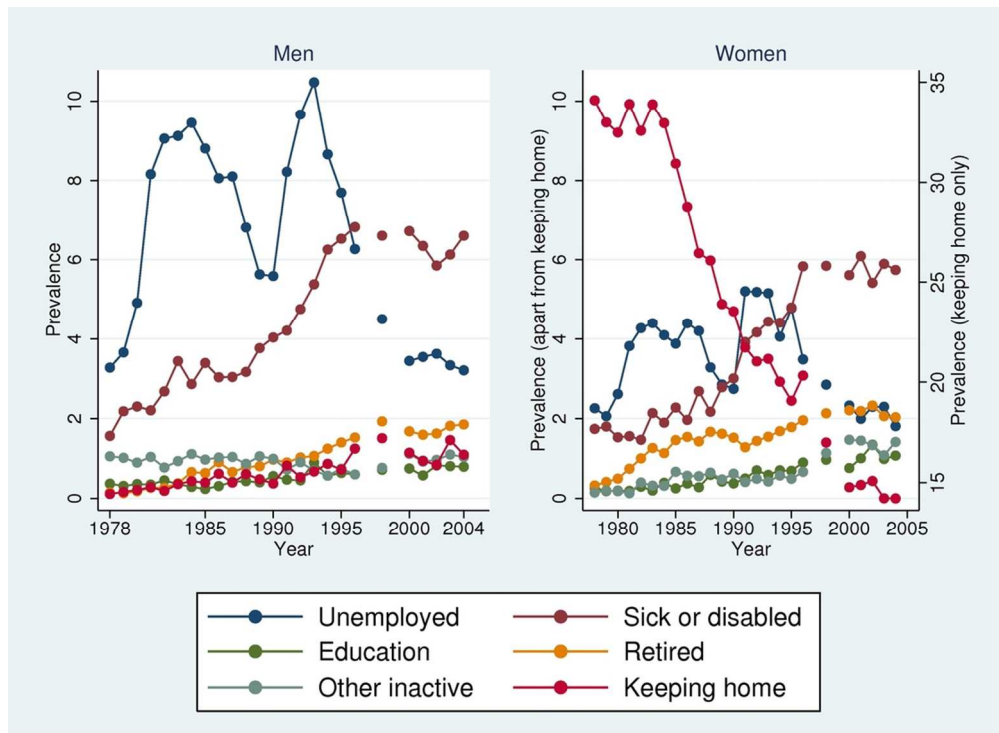

Figure 2 Prevalence of the different types of employment status 1978 to 2004 from men and women aged 25 to 59  
101x73mm (300 x 300 DPI)

1  
2  
3  
4  
5  
6  
7  
8  
9  
10  
11  
12  
13  
14  
15  
16  
17  
18  
19  
20  
21  
22  
23  
24  
25  
26  
27  
28  
29  
30  
31  
32  
33  
34  
35  
36  
37  
38  
39  
40  
41  
42  
43  
44  
45  
46  
47  
48  
49  
50  
51  
52  
53  
54  
55  
56  
57  
58  
59  
60

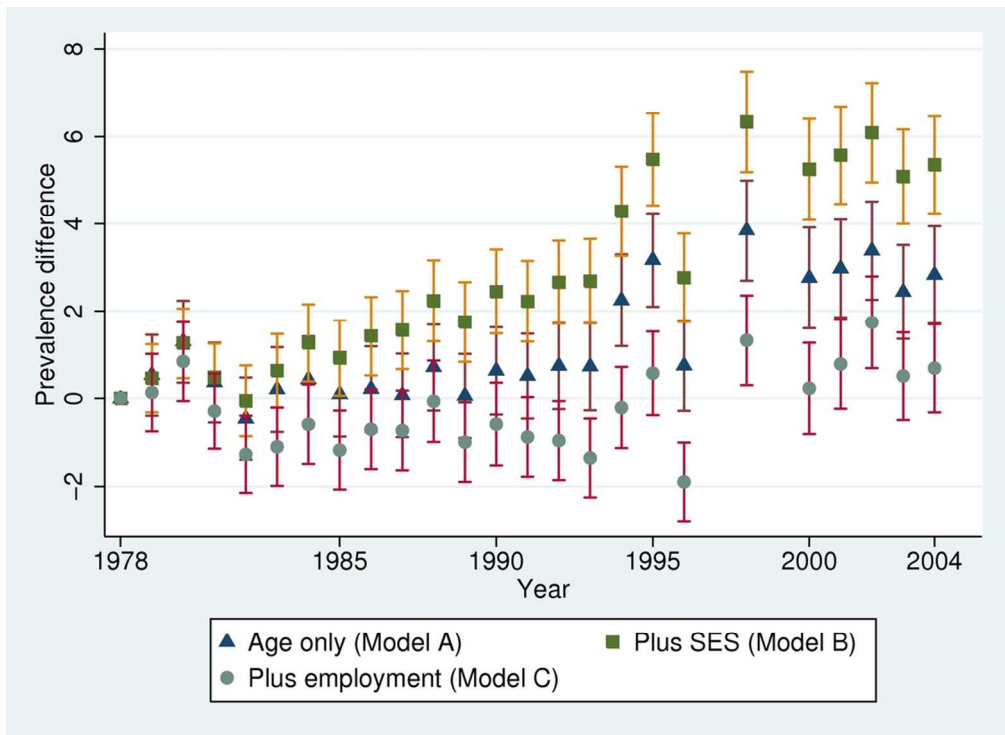

Figure 3 Prevalence difference in poor health from 1978 (reference) to 2004 for men from model A (age adjusted), model B (plus adjustment for socio-economic characteristics) and model C (plus adjustment for employment status).  
101x73mm (300 x 300 DPI)

ew only



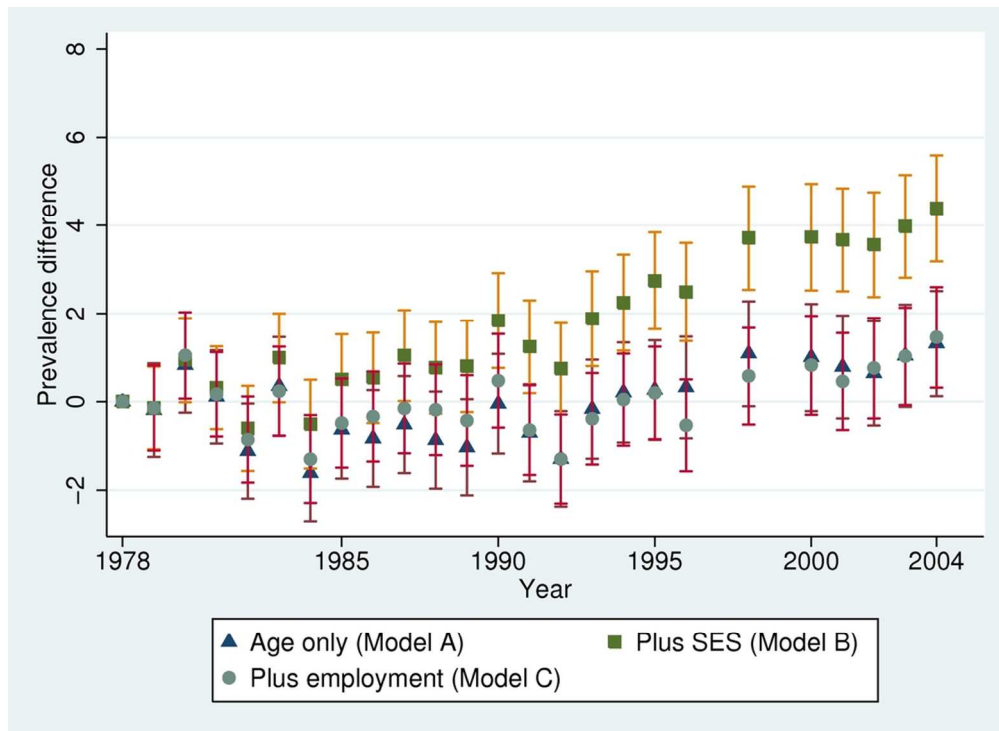

Figure 4 Prevalence difference in poor health from 1978 (reference) to 2004 for women from model A (age adjusted), model B (plus adjustment for socio-economic characteristics) and model C (plus adjustment for employment status).  
101x73mm (300 x 300 DPI)

ew only

Multiple imputation results

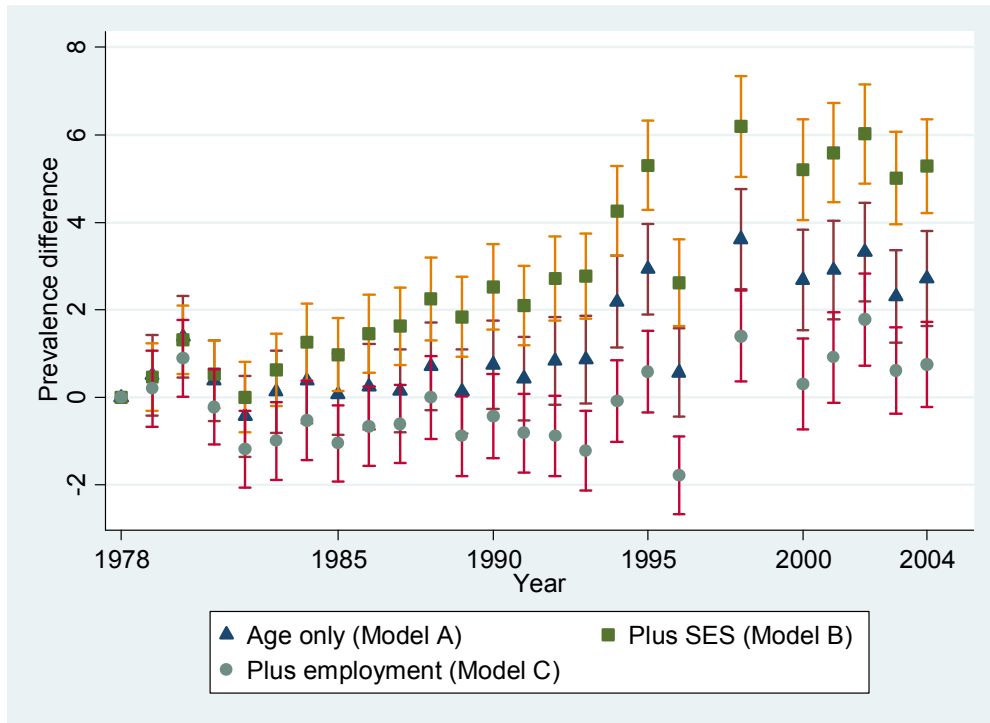

Supplemental figure 1 Prevalence difference in poor health from 1978 (reference) to 2004 for men from model A (age adjusted), model B (plus adjustment for socio-economic characteristics) and model C (plus adjustment for employment status).

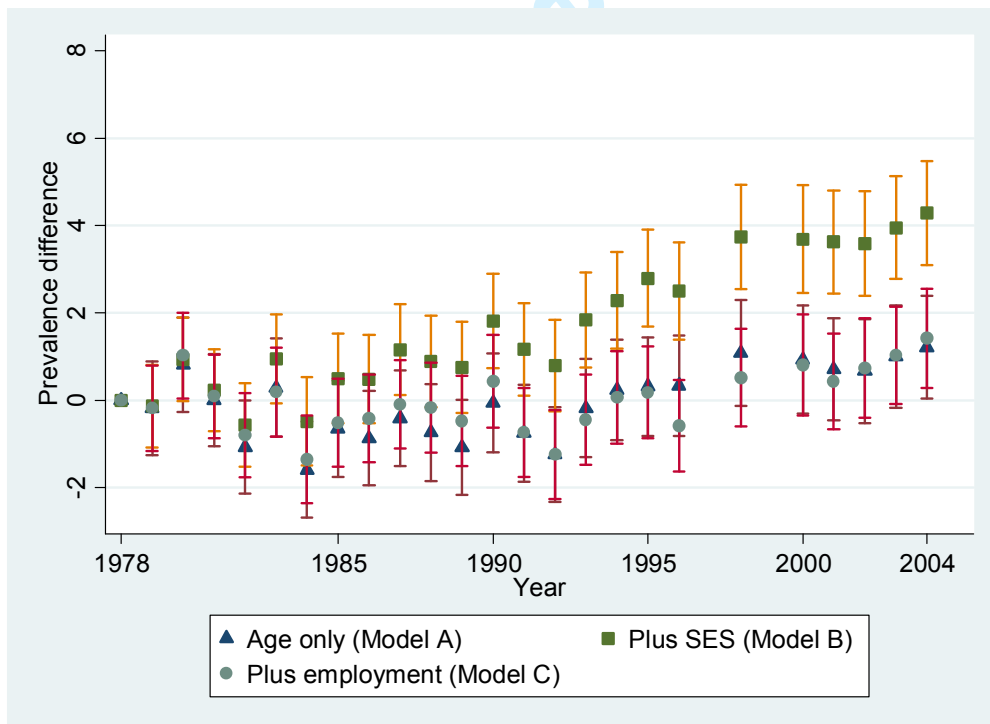

Supplemental figure 2 Prevalence difference in poor health from 1978 (reference) to 2004 for men from model A (age adjusted), model B (plus adjustment for socio-economic characteristics) and model C (plus adjustment for employment status).

Multilevel model results

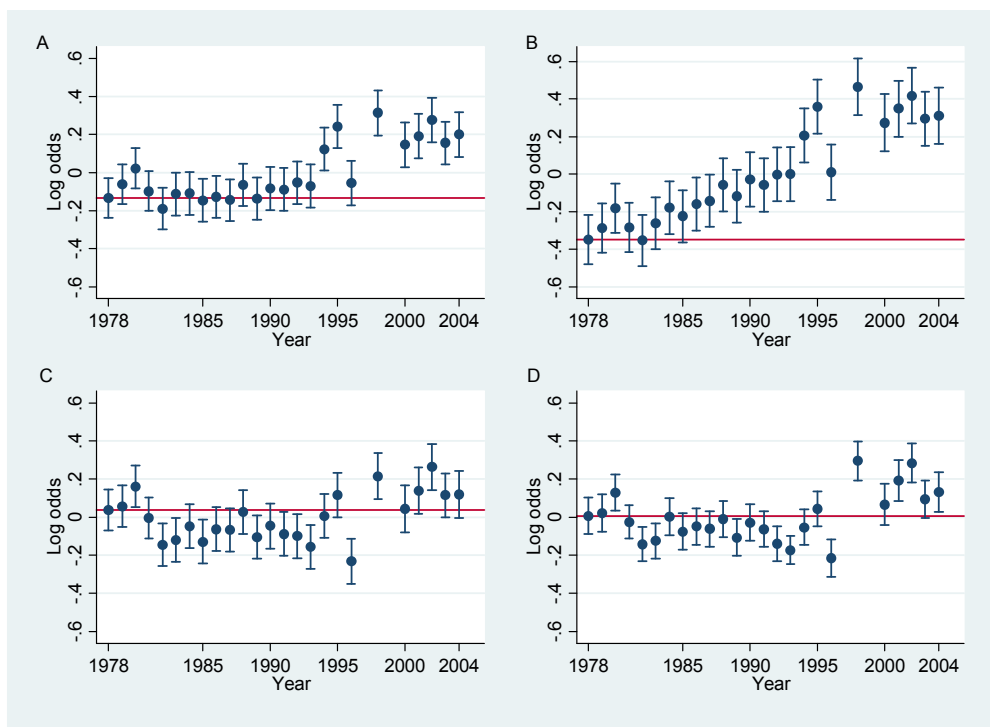

**Supplemental figure 3. Results (on logs odds scale) from multilevel model for men treating year as a random intercept. Estimated annual difference compared to average of all years (0) . For comparison to main results red line indicates 1978. Panel A is model A (adjusted for age only), panel B is model B (plus adjustment for socio-economic characteristics), panel C is model C (plus adjustment for employment status), panel D is model C plus allowing employment status to vary across years.**

1  
2  
3  
4  
5  
6  
7  
8  
9  
10  
11  
12  
13  
14  
15  
16  
17  
18  
19  
20  
21  
22  
23  
24  
25  
26  
27  
28  
29  
30  
31  
32  
33  
34  
35  
36  
37  
38  
39  
40  
41  
42  
43  
44  
45  
46  
47  
48  
49  
50  
51  
52  
53  
54  
55  
56  
57  
58  
59  
60

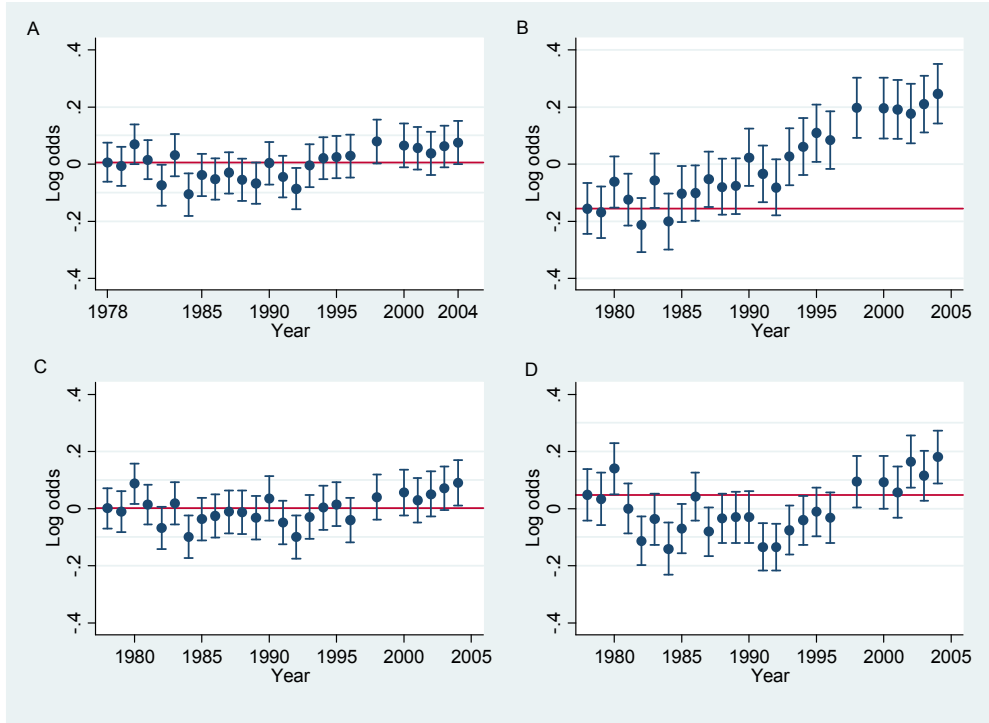

**Supplemental figure 4. Results (on logs odds scale) from multilevel models for women treating year as a random intercept. Estimated annual difference compared to average of all years (0) . For comparison to main results red line indicates 1978. Panel A is model A (adjusted for age only), panel B is model B (plus adjustment for socio-economic characteristics) panel C is model C (plus adjustment for employment status), panel D is model C plus allowing employment status to vary across years.**

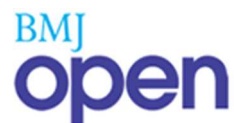

**Employment status and the prevalence of poor self rated health. Findings from UK individual level repeated cross-sectional data from 1978 to 2004**

|                                 |                                                                                  |
|---------------------------------|----------------------------------------------------------------------------------|
| Journal:                        | <i>BMJ Open</i>                                                                  |
| Manuscript ID:                  | bmjopen-2012-001342.R2                                                           |
| Article Type:                   | Research                                                                         |
| Date Submitted by the Author:   | 24-Oct-2012                                                                      |
| Complete List of Authors:       | Popham, Frank<br>Gray, Lindsay<br>Bambra, Clare                                  |
| <b>Primary Subject Heading</b>: | Public health                                                                    |
| Secondary Subject Heading:      | Sociology                                                                        |
| Keywords:                       | employment, unemployment, economic inactivity, self rated health, socio-economic |
|                                 |                                                                                  |

SCHOLARONE™  
Manuscripts

1  
2  
3 **Employment status and the prevalence of poor self rated health. Findings from UK individual level repeated**  
4  
5 **cross-sectional data from 1978 to 2004.**  
6  
7

8  
9 **Frank Popham<sup>1</sup> Linsay Gray<sup>1</sup> and Clare Bamba<sup>2</sup>**  
10

11  
12 <sup>1</sup>MRC/CSO Social and Public Health Sciences Unit

13  
14 4 Lilybank Gardens

15  
16 Glasgow G12 8RZ

17  
18 f.popham@sphsu.mrc.ac.uk  
19

20  
21  
22 Tel: +44 (0) 141 357 3949  
23  
24

25  
26 <sup>2</sup>Department of Geography

27  
28 Wolfson Research Institute

29  
30 Durham University, Queens Campus

31  
32 Stockton on Tees

33  
34 TS17 6BH

35  
36 Word count: 2903

37  
38 Keywords: employment, unemployment, economic inactivity, self rated health, socio-economic  
39  
40  
41  
42  
43  
44  
45  
46  
47  
48  
49  
50  
51  
52  
53  
54  
55  
56  
57  
58  
59  
60

**Abstract**

**Objectives :** To assess using individual level data how the proportion of people in different employment statuses may have played a role in the prevalence of poor self rated health from 1978 to 2004 as there have been major changes in employment patterns in advanced market democracies and employment is an important correlate of health.

**Design:** Individual level analysis of repeated cross-sectional surveys

**Setting:** UK

**Participants:** 125,125 men and 139,535 women of working age (25 to 59)

**Outcome measure:** Self rated general health

**Results:** Compared to 1978 there was evidence of higher levels of poor health in the subsequent years. For example in 2004 the prevalence of poor health was 2.8 (95% CI 1.7 to 3.9) and 1.3 (0.1 to 2.5) percentage points higher than 1978 for men and women respectively after adjusting for age. After additional adjustment for socio-economic characteristics, annual differences compared to 1978 increased (5.4 (4.2 to 6.5) and 4.4 (3.2 to 5.6) for men and women in 2004). Further adjustment for employment status however attenuated the annual differences in poor health (0.7 (-0.3 to 1.7) for men and 1.5 (0.3 to 2.6) for women in 2004). **Conclusions:** These results suggest that the proportion of people in different employment statuses, particularly the proportion in sickness or disability related economic inactivity, could play an important role in the prevalence of poor self rated health in the UK. Whether decreasing economic inactivity would enhance population health is an open question that needs further investigation.

**Trial registration:** This observational study was not reregistered.

**Article summary****Article focus**

- There have been major changes in employment (particularly the growth of those out of work sick or disabled) since the 1970s in many OECD countries.
- Given that self rated health is associated strongly with employment status the changes in employment may potentially be important for the level of poor health in the population.

**Key messages**

- Accounting for population increases in socio-economic characteristics associated with good health suggests that self rated health may have worsened since 1978 for both working age men and women.
- Much of this deterioration disappeared when controlling for employment status.
- There seems to be an association between rising levels of detachment from the labour market for both men and women (even given the rise in women's employment) and the level of poor self rated health in the population.

**Strengths and limitations**

- The study uses consistent individual level data from a long term survey covering a period of socio-economic change.
- Further work is needed to understand whether decreasing economic inactivity would necessarily lead to improved population health.



## Introduction

Since the late 1970s, there have been substantial social, political and economic changes in the UK and in other advanced market democracies. On the one hand, average levels of education and material wealth have increased in the UK since the 1970s [1] and there have been improvements to overall mortality levels and life expectancy. On the other hand, there have been increases in inequalities in wealth and health [1, 2]. Welfare provision has decreased [3] at the same time as there have been large reductions in male employment levels and a related rise in male and female (excluding keeping house) economic inactivity rates [4]. The rise of economic inactivity has been linked to the de-industrialisation experienced by the labour markets of advanced market democracies and the associated loss of full-time, permanent, well-paid and skilled industrial jobs [5].

Being out of work has consistently been associated with a heightened risk of mortality [6], mental ill-health and suicide [7, 8], unhappiness [9], poor general health [10] and limiting long term illness [11, 12]. This heightened risk of ill-health applies not just to those unemployed (out of work and actively seeking work) but also to those economically inactive (out of work and not actively seeking work) [9, 10, 13]. Indeed, previous work suggested that the distribution of economic inactivity was a potentially important factor behind the social gradient in health and in regional differences in health inequalities [10, 14].

Whilst there has been a wealth of research into the association between unemployment and adverse health, there has been much less which examines economic inactivity. Arguably, it is the latter which is of increasing importance in public health terms as whilst unemployment is generally cyclical – rising and falling in line with economic contraction and expansion – economic inactivity has increasingly become a structural labour market problem [4]. For example in the UK, according to the 1966 census 94.4% of non-student working age men were in employment and only 3% were economically inactive whilst in the 2001 census, the figures were 80.2% and 14.5% respectively [15]. This paper examines the potential impact of the changing pattern of employment status on the prevalence of poor self rated health from 1978 to 2004 using individual level data from a repeated cross-sectional survey.

## Methods

The General Household Survey is a UK government repeated cross-sectional household survey that started in 1971 (with gaps in 1997 and 1999). It aimed to interview all adults in selected households. The exact sampling procedures to select households have changed over time but it has employed a stratified (by regional geography and area socio-economic characteristics) clustered sample method with the primary sample units being small (as a rough guide 5000 people) geographical areas (electoral wards until 1983 and postcode sectors thereafter). Households were then randomly selected from within these primary sampling units. It covers Britain rather than the whole of the UK (so excludes Northern Ireland). Its long running nature means that it is highly suitable for assessing change over time. The UK's Office for National Statistics (ONS) has produced a consistent (in terms of making variables as comparable as possible over time) time-series of the surveys 1972 to 2004 and it is this individual level dataset - available from the UK Data Archive - that was used in this analysis [16]. Analysis was limited to men and women aged 25 to 59. The lower age limit was chosen to limit the likelihood of people still being in higher education. Although state retirement age in the UK for the study period was 65 for men and 60 for women, it is common practice to restrict analysis to age 59 and below to limit the number of people who have taken voluntary early retirement straight from paid employment.

The health outcome was self rated general health, with respondents asked "Over the last 12 months, would you say your health has on the whole been: good; fairly good or not good?". For this analysis, it was recoded good and fairly good health (0) versus not good (1) and this latter category is referred to as poor health from now on. The question was first asked in 1977 but the introduction to the question was different in this year so 1978 is taken as the reference year. Individual level employment status was coded as employed, unemployed (out of work but actively seeking work), and the following categories of economic inactivity: retired, in education, keeping house full-time, sick or disabled and other economically inactive. As the employment status variables in the time series file had only three categories (employed, unemployed and economic inactive) we returned to the original annual survey files to compile the more nuanced categories of individual level economic inactivity. Given variations in question wording over time these more nuanced categories of employment status may be less consistent than the broader three category coding. As a check we reran our main analysis using the three broader categories (employed, unemployed and economic inactive) of employment status for men and for women four categories (splitting keeping house and all other forms of

1  
2  
3 economic inactivity as these showed opposing trends in prevalence). Using these broader categories we  
4 obtained very similar results. Single year of age was used in the analysis. Three measures of socio-economic  
5 position were used with categories made consistent as possible over time by the ONS, whether the person had  
6 a university level degree or not, whether they lived in owned outright housing, owned with mortgage housing,  
7 private rented housing or social (state or housing association) rented housing and finally, whether they lived in  
8 a household with car access. Across all years, a total of 10% of men and 4% of women in the sample had  
9 missing data for one or more of the variables. In sensitivity analysis we used multiple imputation  
10 (implemented using the ice command in Stata) to impute missing data. We did the imputation for men and  
11 women and for each year separately. Twenty imputed datasets were created for each year / gender  
12 combination. The imputed models were based on all variables already described plus country of residence  
13 (England, Wales, Scotland) and marital status. The main results using the imputed datasets are shown in the  
14 supplement.

15  
16  
17  
18  
19  
20  
21  
22  
23  
24  
25  
26  
27  
28 For the main analysis we pooled data from all the survey years. The prevalence of poor health amongst  
29 individual respondents in all other years (1979-2004) was compared to 1978 using a logistic regression model  
30 containing year dummy variables with standard errors accounting for the household clustering in the survey  
31 (although this was minimal as men and women in the same household were analysed separately). The initial  
32 model (model A) controlled for age only. Model B additionally adjusted for the socio-economic variables as  
33 these are variables associated with self rated health [17]. Model C then controlled additionally for employment  
34 status to assess its impact on the annual differences. In sensitivity analysis we checked the pattern of results  
35 using multilevel models where we treated year as a random intercept (individuals nested in years) and these  
36 results are shown in the supplement. Non-response weights are included in the time series General Household  
37 Survey file from 2000 onwards (when weights were introduced) and these have been applied in the main  
38 analysis (weights are scaled to have a mean of 1 in each year) with each individual in the years prior to 2000  
39 being weighted equally (at 1). As odds ratios across different logistic models are not directly comparable [18]  
40 we also present the main results as adjusted prevalence differences (that are comparable across models [18])  
41 by using the post estimation “margins” command in Stata. This shows yearly differences on an absolute scale.  
42  
43  
44  
45  
46  
47  
48  
49  
50  
51  
52  
53  
54  
55  
56  
57  
58  
59  
60

1  
2  
3 Even though each annual GHS sample is relatively large, pooling the data had the advantage of increasing the  
4 sample for certain categories of the variables (economic inactivity for example) that in each year were  
5 relatively small. Pooling also provided a direct test of year-on-year differences. One disadvantage is that the  
6 coefficient for the variables is assumed to be the same over the years. We tested the possible impact of  
7 allowing coefficients to vary over the years in two ways. Firstly in our multilevel modelling we fitted a random  
8 coefficient model where we allowed the coefficients for employment status to vary over the years (models  
9 allowing all variables (age, socio-economic characteristics and employment status) to vary in the multilevel  
10 model unfortunately did not converge).

11  
12  
13  
14  
15  
16  
17  
18  
19 Second we used decomposition analysis to compare the observed difference in prevalence of poor health  
20 between the initial year (1978) and the final year (2004) using separate logistic regression models for each of  
21 these years. This means that the coefficients are allowed to be different between the years. This method  
22 allows the difference in prevalence of poor health to be separated into the part associated with changes in the  
23 characteristics of the population between 2004 and 1978 and that associated with changes in size of  
24 coefficients (including the intercept) between 2004 and 1978. For example, comparing an age adjusted model  
25 would mean that the prevalence difference between the two years could be assigned to changes in the effect  
26 size of the coefficients (in this case the age coefficient and the constant) and that due to changes in the age  
27 composition of the population (for example if the population had a higher average age in 2004 compared to  
28 1978). We apply the same models (A, B and C) from the main analysis. We use the mvdcmp command in Stata  
29 to conduct the decomposition [19]. Stata 11.2 was used for the analysis apart from the multilevel modelling  
30 that was conducted in MLwiN.  
31  
32  
33  
34  
35  
36  
37  
38  
39  
40  
41  
42  
43

#### 44 **Results**

45  
46 The total sample sizes across all years were 138,932 men and 145,300 women and these were reduced to  
47 125,125 and 139,535 respectively in the complete case analysis when cases with missing data were excluded.

48  
49 Table 1 includes the response rates and individual year sample sizes for the complete cases.

50  
51  
52 Table 1 shows that for men the prevalence of poor health was low in 1978 (it was lowest in 1982) and then  
53 increased to 10.7% in 2004 a rise of 3.3 percentage points over the period. The rate of poor health was lowest  
54 for women in 1984 having declined slightly from 1978, although in the 1990s the rate rose and was just over 1  
55  
56  
57  
58  
59  
60

1  
2  
3 percentage point higher at the end of period compared to the start. The rate of poor health was always higher  
4  
5 for women than men over the period.  
6  
7

8  
9 There was clear change in the socio-economic characteristics of the population over the period with declines in  
10  
11 the proportion living in social rented housing and increases in the proportion living in owner occupied housing,  
12  
13 living in households with car access and the proportion with degrees (Figure 1).  
14  
15  
16  
17  
18  
19  
20  
21  
22  
23  
24  
25  
26  
27  
28  
29  
30  
31  
32  
33  
34  
35  
36  
37  
38  
39  
40  
41  
42  
43  
44  
45  
46  
47  
48  
49  
50  
51  
52  
53  
54  
55  
56  
57  
58  
59  
60

Table 1 Response rates, sample sizes\*\* and prevalence\*\* of poor health for men and women by year.

| Year | Response rate* (%) | Number of men | % of men in poor health | Number of women | % of women in poor health |
|------|--------------------|---------------|-------------------------|-----------------|---------------------------|
| 1978 | 82                 | 6258          | 7.4                     | 6777            | 11.3                      |
| 1979 | 83                 | 6097          | 8.0                     | 6557            | 11.1                      |
| 1980 | 82                 | 6129          | 8.7                     | 6659            | 12.2                      |
| 1981 | 84                 | 6348          | 7.7                     | 6860            | 11.4                      |
| 1982 | 84                 | 5299          | 6.9                     | 5784            | 10.1                      |
| 1983 | 82                 | 5030          | 7.6                     | 5618            | 11.6                      |
| 1984 | 81                 | 4855          | 7.6                     | 5375            | 9.5                       |
| 1985 | 82                 | 5041          | 7.3                     | 5542            | 10.4                      |
| 1986 | 84                 | 5175          | 7.4                     | 5645            | 10.2                      |
| 1987 | 85                 | 5295          | 7.3                     | 5739            | 10.5                      |
| 1988 | 85                 | 5082          | 8.0                     | 5578            | 10.2                      |
| 1989 | 84                 | 5205          | 7.4                     | 5677            | 10.0                      |
| 1990 | 81                 | 4833          | 7.8                     | 5322            | 11.0                      |
| 1991 | 84                 | 5110          | 7.8                     | 5614            | 10.3                      |
| 1992 | 83                 | 5070          | 8.1                     | 5690            | 9.8                       |
| 1993 | 82                 | 4890          | 7.9                     | 5434            | 10.8                      |
| 1994 | 80                 | 4734          | 9.6                     | 5398            | 11.2                      |
| 1995 | 80                 | 4705          | 10.6                    | 5488            | 11.4                      |
| 1996 | 76                 | 4326          | 8.0                     | 5111            | 11.4                      |
| 1998 | 72                 | 4044          | 11.3                    | 4740            | 12.3                      |
| 2000 | 67                 | 4008          | 10.1                    | 4548            | 12.2                      |
| 2001 | 72                 | 4358          | 10.3                    | 5058            | 12.1                      |
| 2002 | 69                 | 4183          | 11.1                    | 4818            | 12.0                      |
| 2003 | 70                 | 4885          | 10.1                    | 5651            | 12.5                      |
| 2004 | 69                 | 4165          | 10.7                    | 4852            | 12.8                      |

\*Response rates are from <http://www.esds.ac.uk/doc/5640/mrdoc/pdf/5640ghs05appendixb.pdf> (page 10)\*\*  
 Sample size and prevalence of poor health for the complete case sample.

Taking these developments in the socio-economic characteristics of the population into account by controlling for the socio-economic variables in model B (table 2) generally increased annual differences compared to 1978 when model B is compared to model A which controlled only for age differences.

Overall male employment had fallen from 93% to 85% at the end of the period. Figure 2 illustrates the changes in the proportion of people in the various non-employment statuses over time with male unemployment (left panel) being cyclical, peaking in the mid 1980s and the early 1990s recession then falling away and being over taken by those sick or disabled in the late 1990s with this group now being the largest. Other forms of economic inactivity for males showed some increases but remained relatively small. For women, figure 2 (right panel) shows (reading the right hand axis) that there had been a 20 percentage point decline in those keeping home but, as for men, cyclical unemployment, a rise in those sick or disabled

1  
2  
3 overtaking those unemployed and a rise in those retired or in education. However unlike for men, female  
4  
5 employment rose by 13 percentage points over the period from 61% to 74%  
6  
7  
8  
9  
10  
11  
12  
13  
14  
15  
16  
17  
18  
19  
20  
21  
22  
23  
24  
25  
26  
27  
28  
29  
30  
31  
32  
33  
34  
35  
36  
37  
38  
39  
40  
41  
42  
43  
44  
45  
46  
47  
48  
49  
50  
51  
52  
53  
54  
55  
56  
57  
58  
59  
60

For peer review only

1  
2  
3  
4  
5  
6  
7  
8  
9  
10  
11  
12  
13  
14  
15  
16  
17  
18  
19  
20  
21  
22  
23  
24  
25  
26  
27  
28  
29  
30  
31  
32  
33  
34  
35  
36  
37  
38  
39  
40  
41  
42  
43  
44  
45  
46  
47  
48  
49

Table 2 Logistic regression results for rate of poor health for men and women controlling for age (Model A), additionally the listed socio-economic characteristics (model B) and additionally employment status (Model C)

|      | Men (Model A)<br>ORs (95% CIs) | Men (Model B)<br>ORs (95% CIs) | Men (Model C)<br>ORs (95% CIs) | Women (Model A)<br>ORs (95% CIs) | Women (Model B)<br>ORs (95% CIs) | Women (Model C)<br>ORs (95% CIs) |
|------|--------------------------------|--------------------------------|--------------------------------|----------------------------------|----------------------------------|----------------------------------|
| Age  | 1.06 (1.05 to 1.06)            | 1.05 (1.05 to 1.06)            | 1.04 (1.04 to 1.04)            | 1.04 (1.03 to 1.04)              | 1.03 (1.03 to 1.04)              | 1.03 (1.02 to 1.03)              |
| Year |                                |                                |                                |                                  |                                  |                                  |
| 1978 | 1                              | 1                              | 1                              | 1                                | 1                                | 1                                |
| 1979 | 1.08 (0.94 to 1.24)            | 1.09 (0.95 to 1.25)            | 1.02 (0.89 to 1.18)            | 0.98 (0.88 to 1.09)              | 0.98 (0.88 to 1.1)               | 0.98 (0.88 to 1.1)               |
| 1980 | 1.2 (1.05 to 1.37)             | 1.24 (1.08 to 1.42)            | 1.14 (0.99 to 1.31)            | 1.09 (0.98 to 1.21)              | 1.11 (1 to 1.24)                 | 1.13 (1.01 to 1.26)              |
| 1981 | 1.05 (0.92 to 1.21)            | 1.09 (0.95 to 1.25)            | 0.95 (0.83 to 1.1)             | 1.01 (0.91 to 1.13)              | 1.04 (0.93 to 1.16)              | 1.02 (0.91 to 1.14)              |
| 1982 | 0.93 (0.81 to 1.08)            | 0.99 (0.85 to 1.15)            | 0.8 (0.68 to 0.93)             | 0.89 (0.79 to 1)                 | 0.93 (0.83 to 1.04)              | 0.9 (0.8 to 1.01)                |
| 1983 | 1.03 (0.89 to 1.19)            | 1.12 (0.96 to 1.29)            | 0.83 (0.71 to 0.97)            | 1.04 (0.93 to 1.16)              | 1.12 (1 to 1.26)                 | 1.03 (0.91 to 1.16)              |
| 1984 | 1.07 (0.92 to 1.23)            | 1.24 (1.07 to 1.44)            | 0.91 (0.78 to 1.06)            | 0.84 (0.74 to 0.95)              | 0.94 (0.83 to 1.06)              | 0.85 (0.75 to 0.96)              |
| 1985 | 1.01 (0.88 to 1.17)            | 1.17 (1.01 to 1.36)            | 0.81 (0.69 to 0.95)            | 0.94 (0.83 to 1.05)              | 1.06 (0.94 to 1.19)              | 0.94 (0.84 to 1.06)              |
| 1986 | 1.03 (0.89 to 1.19)            | 1.27 (1.09 to 1.47)            | 0.89 (0.76 to 1.04)            | 0.92 (0.82 to 1.03)              | 1.06 (0.95 to 1.2)               | 0.96 (0.85 to 1.08)              |
| 1987 | 1.01 (0.88 to 1.17)            | 1.3 (1.12 to 1.5)              | 0.88 (0.76 to 1.03)            | 0.95 (0.85 to 1.06)              | 1.13 (1 to 1.27)                 | 0.98 (0.87 to 1.11)              |
| 1988 | 1.11 (0.96 to 1.27)            | 1.43 (1.24 to 1.65)            | 0.99 (0.85 to 1.15)            | 0.91 (0.81 to 1.02)              | 1.09 (0.97 to 1.23)              | 0.98 (0.87 to 1.1)               |
| 1989 | 1.01 (0.87 to 1.16)            | 1.33 (1.15 to 1.54)            | 0.84 (0.72 to 0.99)            | 0.9 (0.8 to 1.01)                | 1.1 (0.97 to 1.23)               | 0.95 (0.84 to 1.07)              |
| 1990 | 1.1 (0.95 to 1.26)             | 1.47 (1.27 to 1.7)             | 0.91 (0.77 to 1.06)            | 1 (0.89 to 1.12)                 | 1.22 (1.09 to 1.38)              | 1.06 (0.93 to 1.19)              |
| 1991 | 1.08 (0.94 to 1.24)            | 1.43 (1.23 to 1.65)            | 0.86 (0.74 to 1.01)            | 0.93 (0.83 to 1.04)              | 1.15 (1.02 to 1.29)              | 0.93 (0.82 to 1.05)              |
| 1992 | 1.11 (0.97 to 1.28)            | 1.51 (1.31 to 1.75)            | 0.85 (0.73 to 0.99)            | 0.87 (0.77 to 0.98)              | 1.09 (0.97 to 1.23)              | 0.85 (0.75 to 0.97)              |
| 1993 | 1.11 (0.96 to 1.28)            | 1.52 (1.31 to 1.76)            | 0.79 (0.67 to 0.92)            | 0.98 (0.88 to 1.1)               | 1.23 (1.09 to 1.38)              | 0.95 (0.84 to 1.08)              |
| 1994 | 1.35 (1.17 to 1.55)            | 1.85 (1.61 to 2.13)            | 0.97 (0.83 to 1.13)            | 1.02 (0.91 to 1.15)              | 1.28 (1.13 to 1.43)              | 1.01 (0.89 to 1.14)              |
| 1995 | 1.5 (1.31 to 1.71)             | 2.11 (1.84 to 2.43)            | 1.1 (0.94 to 1.27)             | 1.03 (0.92 to 1.15)              | 1.34 (1.19 to 1.5)               | 1.02 (0.91 to 1.16)              |



|    |                     |                     |                     |                        |                     |                     |                        |
|----|---------------------|---------------------|---------------------|------------------------|---------------------|---------------------|------------------------|
| 1  |                     |                     |                     |                        |                     |                     |                        |
| 2  |                     |                     |                     |                        |                     |                     |                        |
| 3  |                     |                     |                     |                        |                     |                     |                        |
| 4  |                     |                     |                     |                        |                     |                     |                        |
| 5  | 1996                | 1.11 (0.96 to 1.29) | 1.53 (1.32 to 1.78) | 0.71 (0.6 to 0.84)     | 1.03 (0.92 to 1.16) | 1.31 (1.16 to 1.47) | 0.94 (0.83 to 1.06)    |
| 6  | 1998                | 1.61 (1.4 to 1.85)  | 2.31 (2 to 2.66)    | 1.22 (1.05 to 1.43)    | 1.11 (0.99 to 1.25) | 1.47 (1.3 to 1.65)  | 1.07 (0.94 to 1.21)    |
| 7  | 2000                | 1.43 (1.24 to 1.65) | 2.06 (1.78 to 2.39) | 1.04 (0.88 to 1.23)    | 1.1 (0.98 to 1.24)  | 1.47 (1.3 to 1.66)  | 1.1 (0.97 to 1.25)     |
| 8  | 2001                | 1.47 (1.27 to 1.69) | 2.13 (1.85 to 2.46) | 1.13 (0.97 to 1.32)    | 1.08 (0.96 to 1.21) | 1.46 (1.3 to 1.64)  | 1.05 (0.93 to 1.2)     |
| 9  | 2002                | 1.53 (1.33 to 1.76) | 2.25 (1.95 to 2.59) | 1.3 (1.11 to 1.52)     | 1.07 (0.95 to 1.2)  | 1.45 (1.28 to 1.63) | 1.09 (0.96 to 1.24)    |
| 10 | 2003                | 1.38 (1.2 to 1.58)  | 2.03 (1.76 to 2.34) | 1.08 (0.93 to 1.27)    | 1.11 (0.99 to 1.24) | 1.5 (1.34 to 1.69)  | 1.12 (0.99 to 1.27)    |
| 11 | 2004                | 1.44 (1.25 to 1.66) | 2.09 (1.81 to 2.41) | 1.11 (0.95 to 1.31)    | 1.14 (1.01 to 1.27) | 1.56 (1.38 to 1.75) | 1.18 (1.04 to 1.33)    |
| 12 |                     |                     |                     |                        |                     |                     |                        |
| 13 |                     |                     |                     |                        |                     |                     |                        |
| 14 |                     |                     |                     |                        |                     |                     |                        |
| 15 | No degree           |                     | 1                   | 1                      |                     | 1                   | 1                      |
| 16 | Degree              |                     | 0.49 (0.45 to 0.54) | 0.59 (0.54 to 0.65)    |                     | 0.56 (0.51 to 0.61) | 0.66 (0.6 to 0.72)     |
| 17 |                     |                     |                     |                        |                     |                     |                        |
| 18 |                     |                     |                     |                        |                     |                     |                        |
| 19 | Owned outright      |                     | 1                   | 1                      |                     | 1                   | 1                      |
| 20 | Owned with mortgage |                     | 0.75 (0.7 to 0.8)   | 0.95 (0.89 to 1.02)    |                     | 0.97 (0.92 to 1.03) | 1.1 (1.03 to 1.16)     |
| 21 | Private rent        |                     | 1.15 (1.05 to 1.26) | 1.2 (1.08 to 1.33)     |                     | 1.31 (1.21 to 1.42) | 1.31 (1.2 to 1.42)     |
| 22 | Social rent         |                     | 1.88 (1.76 to 2.01) | 1.46 (1.35 to 1.58)    |                     | 1.98 (1.87 to 2.1)  | 1.72 (1.62 to 1.83)    |
| 23 |                     |                     |                     |                        |                     |                     |                        |
| 24 |                     |                     |                     |                        |                     |                     |                        |
| 25 | No car              |                     | 1                   | 1                      |                     | 1                   | 1                      |
| 26 | Car                 |                     | 0.54 (0.51 to 0.57) | 0.85 (0.8 to 0.91)     |                     | 0.6 (0.58 to 0.63)  | 0.73 (0.69 to 0.76)    |
| 27 |                     |                     |                     |                        |                     |                     |                        |
| 28 |                     |                     |                     |                        |                     |                     |                        |
| 29 | Employed            |                     |                     | 1                      |                     |                     | 1                      |
| 30 | Unemployed          |                     |                     | 2.01 (1.86 to 2.18)    |                     |                     | 1.81 (1.65 to 1.98)    |
| 31 | Keeping house       |                     |                     | 2.64 (2.16 to 3.23)    |                     |                     | 1.81 (1.74 to 1.89)    |
| 32 | Sick or disabled    |                     |                     | 28.07 (26.11 to 30.19) |                     |                     | 20.05 (18.68 to 21.52) |
| 33 |                     |                     |                     |                        |                     |                     |                        |
| 34 | In education        |                     |                     | 1.85 (1.33 to 2.58)    |                     |                     | 1.26 (0.96 to 1.65)    |
| 35 | Retired             |                     |                     | 2.59 (2.2 to 3.04)     |                     |                     | 2.12 (1.88 to 2.4)     |
| 36 | Other inactive      |                     |                     | 6.28 (5.46 to 7.21)    |                     |                     | 4.04 (3.44 to 4.75)    |
| 37 |                     |                     |                     |                        |                     |                     |                        |
| 38 |                     |                     |                     |                        |                     |                     |                        |
| 39 |                     |                     |                     |                        |                     |                     |                        |
| 40 |                     |                     |                     |                        |                     |                     |                        |
| 41 |                     |                     |                     |                        |                     |                     |                        |
| 42 |                     |                     |                     |                        |                     |                     |                        |
| 43 |                     |                     |                     |                        |                     |                     |                        |
| 44 |                     |                     |                     |                        |                     |                     |                        |
| 45 |                     |                     |                     |                        |                     |                     |                        |
| 46 |                     |                     |                     |                        |                     |                     |                        |
| 47 |                     |                     |                     |                        |                     |                     |                        |
| 48 |                     |                     |                     |                        |                     |                     |                        |
| 49 |                     |                     |                     |                        |                     |                     |                        |

1  
2  
3  
4  
5  
6 All forms of non employment were associated with an elevated probability of poor health but those sick or  
7  
8 disabled had a particularly strong association (Table 2 – Model C). Controlling for individual level employment  
9  
10 status (model C in table 2) attenuated the odds ratios for poor health for the years subsequent to 1978 for  
11  
12 men and women. Pseudo r2 statistics indicated that model fit improved from model A (age only- 0.04 & 0.02  
13  
14 form men and women respectively) to model B (plus socio-economic characteristics – 0.09 & 0.05) to model C  
15  
16 (plus employment – 0.22 & 0.13) for men and women respectively. Absolute prevalence differences compared  
17  
18 to 1978 from each model are illustrated for men and women in figures 3 and 4 respectively. These highlight  
19  
20 the possible linear increase in poor health year-on-year after controlling for socio-economic characteristics  
21  
22 (Model B) and the attenuating impact of controlling for employment status (Model C). For men controlling for  
23  
24 employment status led to yearly differences from 1978 being lower than for the age only model whereas for  
25  
26 women it led to differences being very similar to the age only model. In the supplement results from the  
27  
28 multiple imputation are shown and are very similar to those in Figure 3 and Figure 4. Results (shown in the  
29  
30 supplement) from the multilevel modelling where year was treated as a random intercept rather than a fixed  
31  
32 covariate showed a very similar pattern in that a clearer year-on-year increase in poor health from 1978 is  
33  
34 apparent in model B compared to model A and that adjustment for employment status (model C) attenuated  
35  
36 these differences even when the effect of employment status was allowed to vary over the years (model D).

37  
38  
39 The results from the decomposition analysis comparing – using separate logistic regression for each year - the  
40  
41 unadjusted observed prevalence difference between 2004 and 1978 are presented in Table 3. For men,  
42  
43 prevalence was 3.3 percentage points higher in 2004 (as shown in Table 1). When adding age only to the  
44  
45 model (Model A) most of the observed difference was not due to changes in the population characteristics  
46  
47 (the population in 2004 was slightly older hence a small part (0.4 percentage points) of the increase was due to  
48  
49 this). Socio-economic characteristics of the population had changed in 2004 (Figure 1) and, model B shows that  
50  
51 health in 2004 could have been considerably better (-4.2 percentage points lower) given the socio-economic  
52  
53 characteristics in 2004 compared to 1978. Instead it was the changes in the coefficients that were associated  
54  
55 with the actual increase in poor health from 1978 to 2004. However, when employment status is added in  
56  
57 model C most of the increase in poor health is now explained by the change in population characteristics from  
58  
59  
60

1978 to 2004. For women, the pattern of results is similar to men for the smaller 1.5 percentage point increase in poor health in 2004 although in model C most of the change is due to changes in coefficients. These results reflect those of the main analysis where controlling for both our socio-economic and employment status variables suggested that for men the difference between 2004 and 1978 would have been slightly lower than the age adjusted difference and for women it would have been very similar.

Table 3 Results for the decomposition analysis for the prevalence difference in poor health in 2004 from 1978 for men and women – model A adjusts for age, model B additionally adjusts for housing tenure, car access and degree attainment, model C adjusts additionally for employment

|                           | Model A – Prevalence difference and 95% CIs*) | Model B             | Model C            |
|---------------------------|-----------------------------------------------|---------------------|--------------------|
| <b>Men</b>                |                                               |                     |                    |
| Due to population change  | 0.4 (0.4 to 0.5)                              | -4.2 (-5 to -3.5)   | 2.4 (1.7 to 3.2)   |
| Due to coefficient change | 2.8 (1.7 to 4.0)                              | 7.5 (6.0 to 9.0)    | 0.8 (-0.5 to 2.1)  |
| Overall difference        | 3.3 (2.1 to 4.4)                              | 3.3 (2.2 to 4.4)    | 3.3 (2.3 to 4.3)   |
| <b>Women</b>              |                                               |                     |                    |
| Due to population change  | 0.2 (.2 to .3)                                | -4.4 (-5.2 to -3.7) | -0.1 (-0.9 to 0.8) |
| Due to coefficient change | 1.3 (0.1 to 2.5)                              | 5.9 (4.4 to 7.5)    | 1.6 (0.1 to 3.1)   |
| Overall Difference        | 1.5 (0.3 to 2.7)                              | 1.5 (0.3 to 2.7)    | 1.5 (0.4 to 2.6)   |

\*Confidence intervals do not account for household clustering as this option is not presently available for mvdcmp

## Discussion

The individual level analysis presented here shows that accounting for shifts in the proportion of the working age population in different employment statuses – most notably the rise of sickness or disability related economic inactivity – attenuated annual differences in the prevalence of poor self rated health in the UK population since the late 1970s. This complements previous individual level analysis into sickness or disability related economic inactivity which found that it was a possible major factor behind the social gradient in health [14] as well as a possible influential issue in regional differences in health [10]. The results suggest that a fuller understanding of why employment status is associated with self-rated health could be important for public health. The relationship between employment status and health is complicated. Systematic reviews have concluded that there is evidence that poor health can cause job loss and that job loss can cause poor health with the latter possibly being the stronger effect of the two [6, 7]. For self-rated general health, there is also evidence of health selection [20] but also causation [21]. So it is possible that rising rates of poor general health have increased economic inactivity. The debate over the relative influence of employment on health versus health on employment is limited though because it tends to emphasise notions of people being in a state of health that either allows them to work or not: a zero-sum approach. Yet, it should be remembered that ill health for the majority is not an impediment to labour market participation [22] but that those in ill-health - particularly in lower socio-economic positions - are most vulnerable to non-employment and were increasingly so in the period under study [22, 23]. So their job loss may not then be caused by their ill-health per se but by the prevailing labour market conditions and the policy response to these [24, 25].

Evidence suggests that the increases in the economically inactive population (particularly those claiming sickness related benefits) in the UK during this period were due to difficult labour market conditions (particularly in de-industrialised areas) [5] [26]. This resulted in those with health conditions (particularly if also from low socio-economic positions) finding themselves towards the back of the job queue and unlikely to find employment [5]. In this sense it is argued that many of those economically inactive because of sickness or disability are “hidden unemployed” as they may be employed given different labour market conditions. [5]. Indeed, in better labour market conditions it is argued that there is “hidden sickness” amongst the active

1  
2  
3 workforce [5]. This does not necessarily require any change in the individual level of ill-health in the population  
4 just change in the proportion of people who are employed. Recent theoretical work on how people self-rate  
5 their general health suggests a cognitive process where people take account of their individual health situation  
6 but do so in the wider context in which they live [27]. Hence the assessment of one's health while being  
7 economically inactive may differ compared to when one is in or seeking work. For example, there is  
8 longitudinal evidence that the reporting of longstanding illness may depend on labour market status with  
9 employment reducing the likelihood of reporting poor health [28]. Coupled to the health damaging  
10 psychological and material consequences of non-work [29] this may allow us to understand why economic  
11 inactivity may be associated with a higher risk of poor general health at the individual level.

12  
13 Of course, confounding is a real possibility within this repeated cross-sectional study. For example, there could  
14 be other confounding or mediating trends that are associated with both general health and employment that  
15 could explain the impact of adjusting for changes in employment status. Examples include the apparent  
16 decline in job quality over time [30] and macro-economic changes such as the rise in the level of income  
17 inequality.

18  
19 Economic inactivity is also a potentially important influence on population health, not just because of the  
20 composition of the inactive population itself, but also because it is generally a longer term state. For example,  
21 a recent cohort study of people out of work and in receipt of incapacity-related benefits in the UK found that  
22 the average length of economic inactivity amongst this group was nine years [31]. Thus the issues which are  
23 usually put forward to explain the association between unemployment and ill health – most notably poverty,  
24 social exclusion and low social status – are thus experienced for a much longer time period by those who are  
25 inactive than by those who are unemployed.

26  
27 Whilst our results suggest that decreasing the numbers of economically inactive could have health benefits,  
28 this is by no means an easy task and not just because of the current economic climate. Research into welfare  
29 to work interventions for those with a disability or chronic illness has found that even in times of solid  
30 economic growth it is very difficult to increase the employment rate of this group. For example, in the UK since  
31 the 1990s there have been increasing efforts to enhance the labour market participation of this group using  
32 various interventions including education, training and work placement schemes; vocational advice and  
33

1  
2  
3 support services; vocational rehabilitation; in-work benefits; financial incentives for employers; employment  
4 rights legislation and accessibility interventions[4]. However, the evidence of effectiveness in terms of actually  
5 increasing employment is very limited [4, 32-34]. This is partly attributed to the largely supply-side orientation  
6 of most of the interventions [4], the focus on employment rather than health improvement [31, 35] and the  
7 lack of demand from employers for workers with complicated and fluctuating health conditions [31].

8  
9 In addition to being only cross-sectional, another limitation of using the General Household Survey is that  
10 response rate fell over time; weighting was introduced in 2000 and we have applied this in all analysis but the  
11 possibility remains that the survey became increasingly unrepresentative over time. It is impossible to assess  
12 the impact of this on our results as we do not have details of non responders. However, evidence comparing a  
13 national census to a national health survey suggested that low socio-economic groups and the out of work  
14 were less well represented in the survey leading to a more conservative estimate of the social gradient in  
15 health in the survey [36].  
16  
17  
18  
19  
20  
21  
22  
23  
24  
25  
26  
27

## 28 **Conclusion**

29  
30 To summarise, this study shows that poor health may have worsened amongst both men and women from  
31 1978 to 2004 when accounting for socio-economic changes. However, controlling for the employment status  
32 changes in the UK since 1978 attenuated the increase in poor general health. This research raises important  
33 public policy issues around the role of employment in overall public health which should be examined further.  
34  
35  
36  
37

## 38 **Acknowledgements**

39  
40 General Household Survey Time Series Dataset 1972-2004 was created by the Office for National Statistics. The  
41 user guide for the time series dataset was created jointly by ONS and the Economic and Social Data Service  
42 (ESDS) Government and downloaded from the UK Data Archive. The data are Crown copyright. The authors  
43 alone are responsible for the analysis and interpretation.  
44  
45  
46  
47

## 48 **Funding**

49  
50 No specific grant was associated with this was work. LG (5TK30) and FP (5TK10) are funded by the MRC  
51  
52

## 53 **Ethics approval**

54  
55 Not required for this secondary analysis of publically available and anonymised secondary data  
56  
57  
58  
59  
60

### Author contributions

FP had the original idea which was developed with CB. FP and LG conducted the analysis. FP drafted the manuscript with revisions from CB and LG.

### References

- 1 Dorling D, Rees P. A nation still dividing: the British census and social polarisation 1971 - 2001. *Environ Plan A* 2003;**35**:1287-313.
- 2 Thomas B, Dorling D, Davey Smith G. Inequalities in premature mortality in Britain: observational study from 1921 to 2007. *BMJ* 2010;**341**:c3639.
- 3 Eikemo TA, Bambra C. The welfare state: a glossary for public health. *J Epidemiol Community Health* 2008;**62**:3-6.
- 4 Bambra C. *Work, Worklessness, and the Political Economy of Health*. Oxford: Oxford University Press 2011.
- 5 Beatty C. A Theory of Employment, Unemployment and Sickness. *Reg Stud* 2000;**34**:617-30.
- 6 Roelfs DJ, Shor E, Davidson KW, et al. Losing life and livelihood: A systematic review and meta-analysis of unemployment and all-cause mortality. *Soc Sci Med* 2011;**72**:840-54.
- 7 Paul KI, Moser K. Unemployment impairs mental health: Meta-analyses. *J Vocat Behav* 2009;**74**:264-82.
- 8 Welch SS. A review of the literature on the epidemiology of parasuicide in the general population. *Psychiatr Serv* 2001;**52**:368.
- 9 Blanchflower D, Oswald A. International Happiness. *The Academy of Management Perspectives (formerly The Academy of Management Executive) (AMP)* 2011;**25**:6-22.
- 10 Bambra C, Popham F. Worklessness and regional differences in the social gradient in general health: Evidence from the 2001 English census. *Health Place* 2010;**16**:1014-21.
- 11 Bartley M, Plewis I. Accumulated labour market disadvantage and limiting long-term illness: data from the 1971-1991 Office for National Statistics' Longitudinal Study. *Int J Epidemiol* 2002;**31**:336-41.
- 12 Korpi T. Accumulating Disadvantage. Longitudinal Analyses of Unemployment and Physical Health in Representative Samples of the Swedish Population. *European Sociological Review* 2001;**17**:255-73.
- 13 Clemens T, Boyle P, Popham F. Unemployment, mortality and the problem of health-related selection: evidence from the Scottish and England & Wales (ONS) longitudinal studies. *Health Stat Q* 2009:7-13.
- 14 Popham F, Bambra C. Evidence from the 2001 English Census on the contribution of employment status to the social gradient in self-rated health. *J Epidemiol Community Health* 2010;**64**:277-80.
- 15 MacKay RR, Davies L. Unemployment, permanent sickness, and nonwork in the United Kingdom. *Environ Plan A* 2007;**40**:464-81.
- 16 User Guide for the General Household Survey (GHS) Time Series Dataset 1972 to 2004 (suitable for pseudo-cohort analysis). [http://www.esds.ac.uk/doc/5664%5Cmrdoc%5Cpdf%5C5664\\_ghs\\_time\\_series\\_user\\_guide.pdf](http://www.esds.ac.uk/doc/5664%5Cmrdoc%5Cpdf%5C5664_ghs_time_series_user_guide.pdf)
- 17 Macintyre S, McKay L, Der G, et al. Socio-economic position and health: what you observe depends on how you measure it. *J Public Health* 2003;**25**:288-94.
- 18 Mood C. Logistic Regression: Why We Cannot Do What We Think We Can Do, and What We Can Do About It. *Eur Sociol Rev* 2010;**26**:67-82.
- 19 Powers DA, Yoshioka H, Yun MS. mvdcmp: Multivariate decomposition for nonlinear response models. *Stata Journal* 2011;**11**:556.
- 20 Ki M, Sacker A, Kelly Y, et al. Health selection operating between classes and across employment statuses. *J Epidemiol Community Health* 2011;**65**:1132-9.
- 21 Sacker A, Wiggins RD, Bartley M, et al. Self-Rated Health Trajectories in the United States and the United Kingdom: A Comparative Study. *Am J Public Health* 2007;**97**:812-8.
- 22 Bartley M, Owen C. Relation between socioeconomic status, employment, and health during economic change, 1973-93. *BMJ* 1996;**313**:445-9.
- 23 Minton JW, Pickett KE, Dorling D. Health, employment, and economic change, 1973-2009: repeated cross sectional study. *BMJ* 2012;**344**.
- 24 Holland P, Burström B, Whitehead M, et al. How Do Macro-Level Contexts and Policies Affect the Employment Chances of Chronically Ill and Disabled People? Part I: The Impact of Recession and Deindustrialization. *Int J Health Serv* 2011;**41**:395-413.

- 1  
2  
3 25 Holland P, Nylén L, Thielen K, *et al.* How Do Macro-Level Contexts and Policies Affect the Employment  
4 Chances of Chronically Ill and Disabled People? Part II: The Impact of Active and Passive Labor Market Policies.  
5 *Int J Health Serv* 2011;**41**:415-30.
- 6 26 Beatty C, Fothergill S, Houston D, *et al.* A gendered theory of employment, unemployment, and  
7 sickness. *Environ Plan C* 2009;**27**:958-74.
- 8 27 Jylhä M. What is self-rated health and why does it predict mortality? Towards a unified conceptual  
9 model. *Soc Sci Med* 2009;**69**:307-16.
- 10 28 Bartley M, Sacker A, Clarke P. Employment status, employment conditions, and limiting illness:  
11 prospective evidence from the British household panel survey 1991-2001. *J Epidemiol Community Health*  
12 2004;**58**:501-6.
- 13 29 Bartley M, Ferrie J, Montgomery SM. Health and labour market disadvantage: unemployment, non-  
14 employment, and job insecurity. In: Marmot M, Wilkinson RG, eds. *Social determinants of health*. Oxford:  
15 Oxford University Press 2006:78-96.
- 16 30 Clark AE. Your Money or Your Life: Changing Job Quality in OECD Countries. *Br J Ind Relat*  
17 2005;**43**:377-400.
- 18 31 Warren J, Garthwaite K, Bamba C. 'A health problem? Health and employability in the UK labour  
19 market'. In: Houston D, Lindsay C, eds. *Disability Benefits and Employment Policy: Fit for Work? Fit for Purpose?*  
20 London: Palgrave in press.
- 21 32 Clayton S, Bamba C, Gosling R, *et al.* Assembling the evidence jigsaw: insights from a systematic  
22 review of UK studies of individual-focused return to work initiatives for disabled and long-term ill people. *BMC*  
23 *Public Health* 2011;**11**:170.
- 24 33 Bamba C, Whitehead M, Hamilton V. Does 'welfare-to-work' work? A systematic review of the  
25 effectiveness of the UK's welfare-to-work programmes for people with a disability or chronic illness. *Soc Sci*  
26 *Med* 2005;**60**:1905-18.
- 27 34 Barr B, Clayton S, Whitehead M, *et al.* To what extent have relaxed eligibility requirements and  
28 increased generosity of disability benefits acted as disincentives for employment? A systematic review of  
29 evidence from countries with well-developed welfare systems. *J Epidemiol Community Health* 2010;**64**:1106-  
30 14.
- 31 35 Bamba C. Doctors are key to welfare reform. *BMJ* 2010;**341**.
- 32 36 Lorant V, Demarest S, Miermans PJ, *et al.* Survey error in measuring socio-economic risk factors of  
33 health status: a comparison of a survey and a census. *Int J Epidemiol* 2007;**36**:1292-9.
- 34  
35  
36  
37  
38  
39  
40  
41  
42  
43  
44  
45  
46  
47  
48  
49  
50  
51  
52  
53  
54  
55  
56  
57  
58  
59  
60



1  
2  
3 Figure 1 Prevalence of housing tenure types, car access and degree attainment 1978 to 2004 for men and  
4 women aged 25 to 59  
5

6  
7 Figure 2 Prevalence of the different types of employment status 1978 to 2004 from men and women aged 25  
8 to 59  
9

10  
11 **Figure 3 Prevalence difference in poor health from 1978 (reference) to 2004 for men from model A (age  
12 adjusted), model B (plus adjustment for socio-economic characteristics) and model C (plus adjustment for  
13 employment status).**

14  
15  
16 **Figure 4 Prevalence difference in poor health from 1978 (reference) to 2004 for women from model A (age  
17 adjusted), model B (plus adjustment for socio-economic characteristics) and model C (plus adjustment for  
18 employment status).**  
19  
20  
21  
22  
23  
24  
25  
26  
27  
28  
29  
30  
31  
32  
33  
34  
35  
36  
37  
38  
39  
40  
41  
42  
43  
44  
45  
46  
47  
48  
49  
50  
51  
52  
53  
54  
55  
56  
57  
58  
59  
60

1  
2  
3 ~~The potential impact of employment status changes on Employment status and the prevalence of poor self~~  
4 rated health. Findings from UK individual level repeated cross-sectional data from 1978 to 2004.  
5  
6  
7

8  
9 **Frank Popham<sup>1</sup> Linsay Gray<sup>1</sup> and Clare Bamba<sup>2</sup>**  
10

11  
12 <sup>1</sup>MRC/CSO Social and Public Health Sciences Unit

13  
14 4 Lilybank Gardens

15  
16 Glasgow G12 8RZ

17  
18 f.popham@sphsu.mrc.ac.uk  
19

20  
21  
22 Tel: +44 (0) 141 357 3949  
23  
24

25  
26 <sup>2</sup>Department of Geography

27  
28 Wolfson Research Institute

29  
30 Durham University, Queens Campus

31  
32 Stockton on Tees

33  
34 TS17 6BH

35  
36 Word count: 2903

37  
38 Keywords: employment, unemployment, economic inactivity, self rated health, socio-economic  
39  
40  
41  
42  
43  
44  
45  
46  
47  
48  
49  
50  
51  
52  
53  
54  
55  
56  
57  
58  
59  
60

**Abstract**

**Objectives :** To assess using individual level data how the proportion of people in different employment statuses may have played a role in the prevalence of poor self rated health from 1978 to 2004 as there have been major changes in employment patterns in advanced market democracies and employment is an important correlate of health.

**Design:** Individual level analysis of repeated cross-sectional surveys

**Setting:** UK

**Participants:** 125,125 men and 139,535 women of working age (25 to 59)

**Outcome measure:** Self rated general health

**Results:** Compared to 1978 there was evidence of higher levels of poor health in the subsequent years. For example in 2004 the prevalence of poor health was 2.8 (95% CI 1.7 to 3.9) and 1.3 (0.1 to 2.5) percentage points higher than 1978 for men and women respectively after adjusting for age. After additional adjustment for socio-economic characteristics, annual differences compared to 1978 increased (5.4 (4.2 to 6.5) and 4.4 (3.2 to 5.6) for men and women in 2004). Further adjustment for employment status however attenuated the annual differences in poor health (0.7 (-0.3 to 1.7) for men and 1.5 (0.3 to 2.6) for women in 2004). **Conclusions:** These results suggest that the proportion of people in different employment statuses, particularly the proportion in sickness or disability related economic inactivity, could play an important role in the prevalence of poor self rated health in the UK. Whether decreasing economic inactivity would enhance population health is an open question that needs further investigation.

**Trial registration:** This observational study was not reregistered.

**Article summary****Article focus**

- There have been major changes in employment (particularly the growth of those out of work sick or disabled) since the 1970s in many OECD countries.
- Given that self rated health is associated strongly with employment status the changes in employment may potentially be important for the level of poor health in the population.

**Key messages**

- Accounting for population increases in socio-economic characteristics associated with good health suggests that self rated health may have worsened since 1978 for both working age men and women.
- Much of this deterioration disappeared when controlling for employment status.
- There seems to be an association between rising levels of detachment from the labour market for both men and women (even given the rise in women's employment) and the level of poor self rated health in the population.

**Strengths and limitations**

- The study uses consistent individual level data from a long term survey covering a period of socio-economic change.
- Further work is needed to understand whether decreasing economic inactivity would necessarily lead to improved population health.

## Introduction

Since the late 1970s, there have been substantial social, political and economic changes in the UK and in other advanced market democracies. On the one hand, average levels of education and material wealth have increased in the UK since the 1970s [1] and there have been improvements to overall mortality levels and life expectancy. On the other hand, there have been increases in inequalities in wealth and health [1, 2]. Welfare provision has decreased [3] at the same time as there have been large reductions in male employment levels and a related rise in male and female (excluding keeping house) economic inactivity rates [4]. The rise of economic inactivity has been linked to the de-industrialisation experienced by the labour markets of advanced market democracies and the associated loss of full-time, permanent, well-paid and skilled industrial jobs [5]. Being out of work has consistently been associated with a heightened risk of mortality [6], mental ill-health and suicide [7, 8], unhappiness [9], poor general health [10] and limiting long term illness [11, 12]. This heightened risk of ill-health applies not just to those unemployed (out of work and actively seeking work) but also to those economically inactive (out of work and not actively seeking work) [9, 10, 13]. Indeed, previous work suggested that the distribution of economic inactivity was a potentially important factor behind the social gradient in health and in regional differences in health inequalities [10, 14].

Whilst there has been a wealth of research into the association between unemployment and adverse health, there has been much less which examines economic inactivity. Arguably, it is the latter which is of increasing importance in public health terms as whilst unemployment is generally cyclical – rising and falling in line with economic contraction and expansion – economic inactivity has increasingly become a structural labour market problem [4]. For example in the UK, according to the 1966 census 94.4% of non-student working age men were in employment and only 3% were economically inactive whilst in the 2001 census, the figures were 80.2% and 14.5% respectively [15]. This paper examines the potential impact of the changing pattern of employment status on the prevalence of poor self rated health from 1978 to 2004 using individual level data from a repeated cross-sectional survey.

## Methods

The General Household Survey is a UK government repeated cross-sectional household survey that started in 1971 (with gaps in 1997 and 1999). It aimed to interview all adults in selected households. The exact sampling procedures to select households have changed over time but it has employed a stratified (by regional geography and area socio-economic characteristics) clustered sample method with the primary sample units being small (as a rough guide 5000 people) geographical areas (electoral wards until 1983 and postcode sectors thereafter). Households were then randomly selected from within these primary sampling units. It covers Britain rather than the whole of the UK (so excludes Northern Ireland). Its long running nature means that it is highly suitable for assessing change over time. The UK's Office for National Statistics (ONS) has produced a consistent (in terms of making variables as comparable as possible over time) time-series of the surveys 1972 to 2004 and it is this individual level dataset - available from the UK Data Archive - that was used in this analysis [16]. Analysis was limited to men and women aged 25 to 59. The lower age limit was chosen to limit the likelihood of people still being in higher education. Although state retirement age in the UK for the study period was 65 for men and 60 for women, it is common practice to restrict analysis to age 59 and below to limit the number of people who have taken voluntary early retirement straight from paid employment.

The health outcome was self rated general health, with respondents asked "Over the last 12 months, would you say your health has on the whole been: good; fairly good or not good?". For this analysis, it was recoded good and fairly good health (0) versus not good (1) and this latter category is referred to as poor health from now on. The question was first asked in 1977 but the introduction to the question was different in this year so 1978 is taken as the reference year. Individual level employment status was coded as employed, unemployed (out of work but actively seeking work), and the following categories of economic inactivity: retired, in education, keeping house full-time, sick or disabled and other economically inactive. As the employment status variables in the time series file had only three categories (employed, unemployed and economic inactive) we returned to the original annual survey files to compile the more nuanced categories of individual level economic inactivity. Given variations in question wording over time these more nuanced categories of employment status may be less consistent than the broader three category coding. As a check we reran our main analysis using the three broader categories (employed, unemployed and economic inactive) of employment status for men -and for women four categories (splitting keeping house and all other forms of

1  
2  
3 economic inactivity as these showed opposing trends in prevalence). Using these broader categories we  
4 obtained very similar results. Single year of age was used in the analysis. Three measures of socio-economic  
5  
6 position were used with categories made consistent as possible over time by the ONS, whether the person had  
7  
8 a university level degree or not, whether they lived in owned outright housing, owned with mortgage housing,  
9  
10 private rented housing or social (state or housing association) rented housing and finally, whether they lived in  
11  
12 a household with car access. Across all years, a total of 10% of men and 4% of women in the sample had  
13  
14 missing data for one or more of the variables. In sensitivity analysis we used multiple imputation  
15  
16 (implemented using the ice command in Stata) to impute missing data. We did the imputation for men and  
17  
18 women and for each year separately. Twenty imputed datasets were created for each year / gender  
19  
20 combination. The imputed models were based on all variables already described plus country of residence  
21  
22 (England, Wales, Scotland) and marital status. The main results using the imputed datasets are shown in the  
23  
24 supplement.  
25  
26

27  
28 For the main analysis we pooled data from all the survey years. The prevalence of poor health amongst  
29  
30 individual respondents in all other years (1979-2004) was compared to 1978 using a logistic regression model  
31  
32 containing year dummy variables with standard errors accounting for the household clustering in the survey  
33  
34 (although this was minimal as men and women in the same household were analysed separately). The initial  
35  
36 model (model A) controlled for age only. Model B additionally adjusted for the socio-economic variables as  
37  
38 these are variables associated with general-self rated health [17]. Model C then controlled additionally for  
39  
40 employment status to assess its impact on the annual differences. In sensitivity analysis we checked the  
41  
42 pattern of results using multilevel models where we treated year as a random intercept (individuals nested in  
43  
44 years) and these results are shown in the supplement. Non-response weights are included in the time series  
45  
46 General Household Survey file from 2000 onwards (when weights were introduced) and these have been  
47  
48 applied in the main analysis (weights are scaled to have a mean of 1 in each year) with each individual in the  
49  
50 years prior to 2000 being weighted equally (at 1). As odds ratios across different logistic models are not  
51  
52 directly comparable [18] we also present the main results as adjusted prevalence differences (that are  
53  
54 comparable across models [18]) by using the post estimation “margins” command in Stata. This shows yearly  
55  
56 differences on an absolute scale.  
57  
58  
59  
60

1  
2  
3 Even though each annual GHS sample is relatively large, pooling the data had the advantage of increasing the  
4 sample for certain categories of the variables (economic inactivity for example) that in each year were  
5 relatively small. Pooling also provided a direct test of year-on-year differences. One disadvantage is that the  
6 coefficient for the variables is assumed to be the same over the years. We tested the possible impact of  
7 allowing coefficients to vary over the years in two ways. Firstly in our multilevel modelling we fitted a random  
8 coefficient model where we allowed the coefficients for employment status to vary over the years (models  
9 allowing all variables (age, socio-economic characteristics and employment status) to vary in the multilevel  
10 model unfortunately did not converge).

11  
12  
13  
14  
15  
16  
17  
18  
19  
20  
21  
22  
23  
24  
25  
26  
27  
28  
29  
30  
31  
32  
33  
34  
35  
36  
37  
38  
39  
40  
41  
42  
43  
44  
45  
46  
47  
48  
49  
50  
51  
52  
53  
54  
55  
56  
57  
58  
59  
60

Second we used decomposition analysis to compare the observed difference in prevalence of poor health between the initial year (1978) and the final year (2004) using separate logistic regression models for each of these years. This means that the coefficients are allowed to be different between the years. This method allows the difference in prevalence of poor health to be separated into the part associated with changes in the characteristics of the population between 2004 and 1978 and that associated with changes in size of coefficients (including the intercept) between 2004 and 1978. For example, comparing an age adjusted model would mean that the prevalence difference between the two years could be assigned to changes in the effect size of the coefficients (in this case the age coefficient and the constant) and that due to changes in the age composition of the population (for example if the population had a higher average age in 2004 compared to 1978). We apply the same models (A, B and C) from the main analysis. We use the mvdcmp command in Stata to conduct the decomposition [19]. Stata 11.2 was used for the analysis apart from the multilevel modelling that was conducted in MLwiN.

## Results

The total sample sizes across all years were 138,932 men and 145,300 women and these were reduced to 125,125 and 139,535 respectively in the complete case analysis when cases with missing data were excluded.

Table 1 includes the response rates and individual year sample sizes for the complete cases.

Table 1 shows that for men the prevalence of poor health was low in 1978 (it was lowest in 1982) and then increased to 10.7% in 2004 a rise of 3.3 percentage points over the period. The rate of poor health was lowest for women in 1984 having declined slightly from 1978, although in the 1990s the rate rose and was just over 1



1  
2  
3 percentage point higher at the end of period compared to the start. The rate of poor health was always higher  
4  
5 for women than men over the period.  
6  
7

8  
9 There was clear change in the socio-economic characteristics of the population over the period with declines in  
10  
11 the proportion living in social rented housing and increases in the proportion living in owner occupied housing,  
12  
13 living in households with car access and the proportion with degrees (Figure 1).  
14  
15  
16  
17  
18  
19  
20  
21  
22  
23  
24  
25  
26  
27  
28  
29  
30  
31  
32  
33  
34  
35  
36  
37  
38  
39  
40  
41  
42  
43  
44  
45  
46  
47  
48  
49  
50  
51  
52  
53  
54  
55  
56  
57  
58  
59  
60

Table 1 Response rates, sample sizes\*\* and prevalence\*\* of poor health for men and women by year.

| Year | Response rate* (%) | Number of men | % of men in poor health | Number of women | % of women in poor health |
|------|--------------------|---------------|-------------------------|-----------------|---------------------------|
| 1978 | 82                 | 6258          | 7.4                     | 6777            | 11.3                      |
| 1979 | 83                 | 6097          | 8.0                     | 6557            | 11.1                      |
| 1980 | 82                 | 6129          | 8.7                     | 6659            | 12.2                      |
| 1981 | 84                 | 6348          | 7.7                     | 6860            | 11.4                      |
| 1982 | 84                 | 5299          | 6.9                     | 5784            | 10.1                      |
| 1983 | 82                 | 5030          | 7.6                     | 5618            | 11.6                      |
| 1984 | 81                 | 4855          | 7.6                     | 5375            | 9.5                       |
| 1985 | 82                 | 5041          | 7.3                     | 5542            | 10.4                      |
| 1986 | 84                 | 5175          | 7.4                     | 5645            | 10.2                      |
| 1987 | 85                 | 5295          | 7.3                     | 5739            | 10.5                      |
| 1988 | 85                 | 5082          | 8.0                     | 5578            | 10.2                      |
| 1989 | 84                 | 5205          | 7.4                     | 5677            | 10.0                      |
| 1990 | 81                 | 4833          | 7.8                     | 5322            | 11.0                      |
| 1991 | 84                 | 5110          | 7.8                     | 5614            | 10.3                      |
| 1992 | 83                 | 5070          | 8.1                     | 5690            | 9.8                       |
| 1993 | 82                 | 4890          | 7.9                     | 5434            | 10.8                      |
| 1994 | 80                 | 4734          | 9.6                     | 5398            | 11.2                      |
| 1995 | 80                 | 4705          | 10.6                    | 5488            | 11.4                      |
| 1996 | 76                 | 4326          | 8.0                     | 5111            | 11.4                      |
| 1998 | 72                 | 4044          | 11.3                    | 4740            | 12.3                      |
| 2000 | 67                 | 4008          | 10.1                    | 4548            | 12.2                      |
| 2001 | 72                 | 4358          | 10.3                    | 5058            | 12.1                      |
| 2002 | 69                 | 4183          | 11.1                    | 4818            | 12.0                      |
| 2003 | 70                 | 4885          | 10.1                    | 5651            | 12.5                      |
| 2004 | 69                 | 4165          | 10.7                    | 4852            | 12.8                      |

\*Response rates are from <http://www.esds.ac.uk/doc/5640/mrdoc/pdf/5640ghs05appendixb.pdf> (page 10)\*\*  
 Sample size and prevalence of poor health for the complete case sample.

Taking these developments in the socio-economic characteristics of the population into account by controlling for the socio-economic variables in model B (table 2) generally increased annual differences compared to 1978 when model B is compared to model A which controlled only for age differences.

Overall male employment had fallen from 93% to 85% at the end of the period. Figure 2 illustrates the changes in the proportion of people in the various non-employment statuses over time with male unemployment (left panel) being cyclical, peaking in the mid 1980s and the early 1990s recession then falling away and being over taken by those sick or disabled in the late 1990s with this group now being the largest. Other forms of economic inactivity for males showed some increases but remained relatively small. For women, figure 2 (right panel) shows (reading the right hand axis) that there had been a 20 percentage point decline in those keeping home but, as for men, cyclical unemployment, a rise in those sick or disabled

1  
2  
3 overtaking those unemployed and a rise in those retired or in education. However unlike for men, female  
4  
5 employment rose by 13 percentage points over the period from 61% to 74%  
6  
7  
8  
9  
10  
11  
12  
13  
14  
15  
16  
17  
18  
19  
20  
21  
22  
23  
24  
25  
26  
27  
28  
29  
30  
31  
32  
33  
34  
35  
36  
37  
38  
39  
40  
41  
42  
43  
44  
45  
46  
47  
48  
49  
50  
51  
52  
53  
54  
55  
56  
57  
58  
59  
60

For peer review only

1  
2  
3  
4  
5  
6  
7  
8  
9  
10  
11  
12  
13  
14  
15  
16  
17  
18  
19  
20  
21  
22  
23  
24  
25  
26  
27  
28  
29  
30  
31  
32  
33  
34  
35  
36  
37  
38  
39  
40  
41  
42  
43  
44  
45  
46  
47  
48  
49

Table 2 Logistic regression results for rate of poor health for men and women controlling for age (Model A), additionally the listed socio-economic characteristics (model B) and additionally employment status (Model C)

|      | Men (Model A)<br>ORs (95% CIs) | Men (Model B)<br>ORs (95% CIs) | Men (Model C)<br>ORs (95% CIs) | Women (Model A)<br>ORs (95% CIs) | Women (Model B)<br>ORs (95% CIs) | Women (Model C)<br>ORs (95% CIs) |
|------|--------------------------------|--------------------------------|--------------------------------|----------------------------------|----------------------------------|----------------------------------|
| Age  | 1.06 (1.05 to 1.06)            | 1.05 (1.05 to 1.06)            | 1.04 (1.04 to 1.04)            | 1.04 (1.03 to 1.04)              | 1.03 (1.03 to 1.04)              | 1.03 (1.02 to 1.03)              |
| Year |                                |                                |                                |                                  |                                  |                                  |
| 1978 | 1                              | 1                              | 1                              | 1                                | 1                                | 1                                |
| 1979 | 1.08 (0.94 to 1.24)            | 1.09 (0.95 to 1.25)            | 1.02 (0.89 to 1.18)            | 0.98 (0.88 to 1.09)              | 0.98 (0.88 to 1.1)               | 0.98 (0.88 to 1.1)               |
| 1980 | 1.2 (1.05 to 1.37)             | 1.24 (1.08 to 1.42)            | 1.14 (0.99 to 1.31)            | 1.09 (0.98 to 1.21)              | 1.11 (1 to 1.24)                 | 1.13 (1.01 to 1.26)              |
| 1981 | 1.05 (0.92 to 1.21)            | 1.09 (0.95 to 1.25)            | 0.95 (0.83 to 1.1)             | 1.01 (0.91 to 1.13)              | 1.04 (0.93 to 1.16)              | 1.02 (0.91 to 1.14)              |
| 1982 | 0.93 (0.81 to 1.08)            | 0.99 (0.85 to 1.15)            | 0.8 (0.68 to 0.93)             | 0.89 (0.79 to 1)                 | 0.93 (0.83 to 1.04)              | 0.9 (0.8 to 1.01)                |
| 1983 | 1.03 (0.89 to 1.19)            | 1.12 (0.96 to 1.29)            | 0.83 (0.71 to 0.97)            | 1.04 (0.93 to 1.16)              | 1.12 (1 to 1.26)                 | 1.03 (0.91 to 1.16)              |
| 1984 | 1.07 (0.92 to 1.23)            | 1.24 (1.07 to 1.44)            | 0.91 (0.78 to 1.06)            | 0.84 (0.74 to 0.95)              | 0.94 (0.83 to 1.06)              | 0.85 (0.75 to 0.96)              |
| 1985 | 1.01 (0.88 to 1.17)            | 1.17 (1.01 to 1.36)            | 0.81 (0.69 to 0.95)            | 0.94 (0.83 to 1.05)              | 1.06 (0.94 to 1.19)              | 0.94 (0.84 to 1.06)              |
| 1986 | 1.03 (0.89 to 1.19)            | 1.27 (1.09 to 1.47)            | 0.89 (0.76 to 1.04)            | 0.92 (0.82 to 1.03)              | 1.06 (0.95 to 1.2)               | 0.96 (0.85 to 1.08)              |
| 1987 | 1.01 (0.88 to 1.17)            | 1.3 (1.12 to 1.5)              | 0.88 (0.76 to 1.03)            | 0.95 (0.85 to 1.06)              | 1.13 (1 to 1.27)                 | 0.98 (0.87 to 1.11)              |
| 1988 | 1.11 (0.96 to 1.27)            | 1.43 (1.24 to 1.65)            | 0.99 (0.85 to 1.15)            | 0.91 (0.81 to 1.02)              | 1.09 (0.97 to 1.23)              | 0.98 (0.87 to 1.1)               |
| 1989 | 1.01 (0.87 to 1.16)            | 1.33 (1.15 to 1.54)            | 0.84 (0.72 to 0.99)            | 0.9 (0.8 to 1.01)                | 1.1 (0.97 to 1.23)               | 0.95 (0.84 to 1.07)              |
| 1990 | 1.1 (0.95 to 1.26)             | 1.47 (1.27 to 1.7)             | 0.91 (0.77 to 1.06)            | 1 (0.89 to 1.12)                 | 1.22 (1.09 to 1.38)              | 1.06 (0.93 to 1.19)              |
| 1991 | 1.08 (0.94 to 1.24)            | 1.43 (1.23 to 1.65)            | 0.86 (0.74 to 1.01)            | 0.93 (0.83 to 1.04)              | 1.15 (1.02 to 1.29)              | 0.93 (0.82 to 1.05)              |
| 1992 | 1.11 (0.97 to 1.28)            | 1.51 (1.31 to 1.75)            | 0.85 (0.73 to 0.99)            | 0.87 (0.77 to 0.98)              | 1.09 (0.97 to 1.23)              | 0.85 (0.75 to 0.97)              |
| 1993 | 1.11 (0.96 to 1.28)            | 1.52 (1.31 to 1.76)            | 0.79 (0.67 to 0.92)            | 0.98 (0.88 to 1.1)               | 1.23 (1.09 to 1.38)              | 0.95 (0.84 to 1.08)              |
| 1994 | 1.35 (1.17 to 1.55)            | 1.85 (1.61 to 2.13)            | 0.97 (0.83 to 1.13)            | 1.02 (0.91 to 1.15)              | 1.28 (1.13 to 1.43)              | 1.01 (0.89 to 1.14)              |
| 1995 | 1.5 (1.31 to 1.71)             | 2.11 (1.84 to 2.43)            | 1.1 (0.94 to 1.27)             | 1.03 (0.92 to 1.15)              | 1.34 (1.19 to 1.5)               | 1.02 (0.91 to 1.16)              |

|    |                     |                     |                     |                        |                     |                     |                        |
|----|---------------------|---------------------|---------------------|------------------------|---------------------|---------------------|------------------------|
| 1  |                     |                     |                     |                        |                     |                     |                        |
| 2  |                     |                     |                     |                        |                     |                     |                        |
| 3  |                     |                     |                     |                        |                     |                     |                        |
| 4  |                     |                     |                     |                        |                     |                     |                        |
| 5  | 1996                | 1.11 (0.96 to 1.29) | 1.53 (1.32 to 1.78) | 0.71 (0.6 to 0.84)     | 1.03 (0.92 to 1.16) | 1.31 (1.16 to 1.47) | 0.94 (0.83 to 1.06)    |
| 6  | 1998                | 1.61 (1.4 to 1.85)  | 2.31 (2 to 2.66)    | 1.22 (1.05 to 1.43)    | 1.11 (0.99 to 1.25) | 1.47 (1.3 to 1.65)  | 1.07 (0.94 to 1.21)    |
| 7  | 2000                | 1.43 (1.24 to 1.65) | 2.06 (1.78 to 2.39) | 1.04 (0.88 to 1.23)    | 1.1 (0.98 to 1.24)  | 1.47 (1.3 to 1.66)  | 1.1 (0.97 to 1.25)     |
| 8  | 2001                | 1.47 (1.27 to 1.69) | 2.13 (1.85 to 2.46) | 1.13 (0.97 to 1.32)    | 1.08 (0.96 to 1.21) | 1.46 (1.3 to 1.64)  | 1.05 (0.93 to 1.2)     |
| 9  | 2002                | 1.53 (1.33 to 1.76) | 2.25 (1.95 to 2.59) | 1.3 (1.11 to 1.52)     | 1.07 (0.95 to 1.2)  | 1.45 (1.28 to 1.63) | 1.09 (0.96 to 1.24)    |
| 10 | 2003                | 1.38 (1.2 to 1.58)  | 2.03 (1.76 to 2.34) | 1.08 (0.93 to 1.27)    | 1.11 (0.99 to 1.24) | 1.5 (1.34 to 1.69)  | 1.12 (0.99 to 1.27)    |
| 11 | 2004                | 1.44 (1.25 to 1.66) | 2.09 (1.81 to 2.41) | 1.11 (0.95 to 1.31)    | 1.14 (1.01 to 1.27) | 1.56 (1.38 to 1.75) | 1.18 (1.04 to 1.33)    |
| 12 |                     |                     |                     |                        |                     |                     |                        |
| 13 |                     |                     |                     |                        |                     |                     |                        |
| 14 |                     |                     |                     |                        |                     |                     |                        |
| 15 | No degree           |                     | 1                   | 1                      |                     | 1                   | 1                      |
| 16 | Degree              |                     | 0.49 (0.45 to 0.54) | 0.59 (0.54 to 0.65)    |                     | 0.56 (0.51 to 0.61) | 0.66 (0.6 to 0.72)     |
| 17 |                     |                     |                     |                        |                     |                     |                        |
| 18 |                     |                     |                     |                        |                     |                     |                        |
| 19 | Owned outright      |                     | 1                   | 1                      |                     | 1                   | 1                      |
| 20 | Owned with mortgage |                     | 0.75 (0.7 to 0.8)   | 0.95 (0.89 to 1.02)    |                     | 0.97 (0.92 to 1.03) | 1.1 (1.03 to 1.16)     |
| 21 | Private rent        |                     | 1.15 (1.05 to 1.26) | 1.2 (1.08 to 1.33)     |                     | 1.31 (1.21 to 1.42) | 1.31 (1.2 to 1.42)     |
| 22 | Social rent         |                     | 1.88 (1.76 to 2.01) | 1.46 (1.35 to 1.58)    |                     | 1.98 (1.87 to 2.1)  | 1.72 (1.62 to 1.83)    |
| 23 |                     |                     |                     |                        |                     |                     |                        |
| 24 |                     |                     |                     |                        |                     |                     |                        |
| 25 | No car              |                     | 1                   | 1                      |                     | 1                   | 1                      |
| 26 | Car                 |                     | 0.54 (0.51 to 0.57) | 0.85 (0.8 to 0.91)     |                     | 0.6 (0.58 to 0.63)  | 0.73 (0.69 to 0.76)    |
| 27 |                     |                     |                     |                        |                     |                     |                        |
| 28 |                     |                     |                     |                        |                     |                     |                        |
| 29 | Employed            |                     |                     | 1                      |                     |                     | 1                      |
| 30 | Unemployed          |                     |                     | 2.01 (1.86 to 2.18)    |                     |                     | 1.81 (1.65 to 1.98)    |
| 31 | Keeping house       |                     |                     | 2.64 (2.16 to 3.23)    |                     |                     | 1.81 (1.74 to 1.89)    |
| 32 | Sick or disabled    |                     |                     | 28.07 (26.11 to 30.19) |                     |                     | 20.05 (18.68 to 21.52) |
| 33 |                     |                     |                     |                        |                     |                     |                        |
| 34 |                     |                     |                     |                        |                     |                     |                        |
| 35 | In Education        |                     |                     | 1.85 (1.33 to 2.58)    |                     |                     | 1.26 (0.96 to 1.65)    |
| 36 | Retired             |                     |                     | 2.59 (2.2 to 3.04)     |                     |                     | 2.12 (1.88 to 2.4)     |
| 37 | Other inactive      |                     |                     | 6.28 (5.46 to 7.21)    |                     |                     | 4.04 (3.44 to 4.75)    |
| 38 |                     |                     |                     |                        |                     |                     |                        |
| 39 |                     |                     |                     |                        |                     |                     |                        |
| 40 |                     |                     |                     |                        |                     |                     |                        |
| 41 |                     |                     |                     |                        |                     |                     |                        |
| 42 |                     |                     |                     |                        |                     |                     |                        |
| 43 |                     |                     |                     |                        |                     |                     |                        |
| 44 |                     |                     |                     |                        |                     |                     |                        |
| 45 |                     |                     |                     |                        |                     |                     |                        |
| 46 |                     |                     |                     |                        |                     |                     |                        |
| 47 |                     |                     |                     |                        |                     |                     |                        |
| 48 |                     |                     |                     |                        |                     |                     |                        |
| 49 |                     |                     |                     |                        |                     |                     |                        |

1  
2  
3  
4  
5  
6 All forms of non employment were associated with an elevated probability of poor health but those sick or  
7  
8 disabled had a particularly strong association (Table 2 – Model C). Controlling for individual level employment  
9  
10 status (model C in table 2) attenuated the odds ratios for poor health for the years subsequent to 1978 for  
11  
12 men and women. Pseudo r2 statistics indicated that model fit improved from model A (age only- 0.04 & 0.02  
13  
14 form men and women respectively) to model B (plus socio-economic characteristics – 0.09 & 0.05) to model C  
15  
16 (plus employment – 0.22 & 0.13) for men and women respectively. Absolute prevalence differences compared  
17  
18 to 1978 from each model are illustrated for men and women in figures 3 and 4 respectively. These highlight  
19  
20 the possible linear increase in poor health year-on-year after controlling for socio-economic characteristics  
21  
22 (Model B) and the attenuating impact of controlling for employment status (Model C). For men controlling for  
23  
24 employment status led to yearly differences from 1978 being lower than for the age only model whereas for  
25  
26 women it led to differences being very similar to the age only model. In the supplement results from the  
27  
28 multiple imputation are shown and are very similar to those in Figure 3 and Figure 4. Results (shown in the  
29  
30 supplement) from the multilevel modelling where year was treated as a random intercept rather than a fixed  
31  
32 covariate showed a very similar pattern in that a clearer year-on-year increase in poor health from 1978 is  
33  
34 apparent in model B compared to model A and that adjustment for employment status (model C) attenuated  
35  
36 these differences even when the effect of employment status was allowed to vary over the years (model D).

37  
38  
39 The results from the decomposition analysis comparing – using separate logistic regression for each year - the  
40  
41 unadjusted observed prevalence difference between 2004 and 1978 are presented in Table 3. For men,  
42  
43 prevalence was 3.3 percentage points higher in 2004 (as shown in Table 1). When adding age only to the  
44  
45 model (Model A) most of the observed difference was not due to changes in the population characteristics  
46  
47 (the population in 2004 was slightly older hence a small part (0.4 percentage points) of the increase was due to  
48  
49 this). Socio-economic characteristics of the population had changed in 2004 (Figure 1) and, model B shows that  
50  
51 health in 2004 could have been considerably better (-4.2 percentage points lower) given the socio-economic  
52  
53 characteristics in 2004 compared to 1978. Instead it was the changes in the coefficients that were associated  
54  
55 with the actual increase in poor health from 1978 to 2004. However, when employment status is added in  
56  
57 model C most of the increase in poor health is now explained by the change in population characteristics from  
58  
59  
60

1978 to 2004. For women, the pattern of results is similar to men for the smaller 1.5 percentage point increase in poor health in 2004 although in model C most of the change is due to changes in coefficients. These results reflect those of the main analysis where controlling for both our socio-economic and employment status variables suggested that for men the difference between 2004 and 1978 would have been slightly lower than the age adjusted difference and for women it would have been very similar.

Table 3 Results for the decomposition analysis for the prevalence difference in poor health in 2004 from 1978 for men and women – model A adjusts for age, model B additionally adjusts for housing tenure, car access and degree attainment, model C adjusts additionally for employment

|                           | Model A – Prevalence difference and 95% CIs*) | Model B             | Model C            |
|---------------------------|-----------------------------------------------|---------------------|--------------------|
| <b>Men</b>                |                                               |                     |                    |
| Due to population change  | 0.4 (0.4 to 0.5)                              | -4.2 (-5 to -3.5)   | 2.4 (1.7 to 3.2)   |
| Due to coefficient change | 2.8 (1.7 to 4.0)                              | 7.5 (6.0 to 9.0)    | 0.8 (-0.5 to 2.1)  |
| Overall difference        | 3.3 (2.1 to 4.4)                              | 3.3 (2.2 to 4.4)    | 3.3 (2.3 to 4.3)   |
| <b>Women</b>              |                                               |                     |                    |
| Due to population change  | 0.2 (.2 to .3)                                | -4.4 (-5.2 to -3.7) | -0.1 (-0.9 to 0.8) |
| Due to coefficient change | 1.3 (0.1 to 2.5)                              | 5.9 (4.4 to 7.5)    | 1.6 (0.1 to 3.1)   |
| Overall Difference        | 1.5 (0.3 to 2.7)                              | 1.5 (0.3 to 2.7)    | 1.5 (0.4 to 2.6)   |

\*Confidence intervals do not account for household clustering as this option is not presently available for mvdcmp

## Discussion

The individual level analysis presented here shows that accounting for shifts in the proportion of the working age population in different employment statuses – most notably the rise of sickness or disability related economic inactivity – attenuated annual differences in the prevalence of poor self rated health in the UK population since the late 1970s. This complements previous individual level analysis into sickness or disability related economic inactivity which found that it was a possible major factor behind the social gradient in health [14] as well as a possible influential issue in regional differences in health [10]. The results suggest that a fuller understanding of why employment status is associated with self-rated health could be important for public health. The relationship between employment status and health is complicated. Systematic reviews have concluded that there is evidence that poor health can cause job loss and that job loss can cause poor health with the latter possibly being the stronger effect of the two [6, 7]. For self-rated general health, there is also evidence of health selection [20] but also causation [21]. So it is possible that rising rates of poor general health have increased economic inactivity. The debate over the relative influence of employment on health versus health on employment is limited though because it tends to emphasise notions of people being in a state of health that either allows them to work or not: a zero-sum approach. Yet, it should be remembered that ill health for the majority is not an impediment to labour market participation [22] but that those in ill-health - particularly in lower socio-economic positions - are most vulnerable to non-employment and were increasingly so in the period under study [22, 23]. So their job loss may not then be caused by their ill-health per se but by the prevailing labour market conditions and the policy response to these [24, 25].

Evidence suggests that the increases in the economically inactive population (particularly those claiming sickness related benefits) in the UK during this period were due to difficult labour market conditions (particularly in de-industrialised areas) [5] [26]. This resulted in those with health conditions (particularly if also from low socio-economic positions) finding themselves towards the back of the job queue and unlikely to find employment [5]. In this sense it is argued that many of those economically inactive because of sickness or disability are “hidden unemployed” as they may be employed given different labour market conditions. [5]. Indeed, in better labour market conditions it is argued that there is “hidden sickness” amongst the active



1  
2  
3 workforce [5]. This does not necessarily require any change in the individual level of ill-health in the population  
4 just change in the proportion of people who are employed. Recent theoretical work on how people self-rate  
5 their general health suggests a cognitive process where people take account of their individual health situation  
6 but do so in the wider context in which they live [27]. Hence the assessment of one's health while being  
7 economically inactive may differ compared to when one is in or seeking work. For example, there is  
8 longitudinal evidence that the reporting of longstanding illness may depend on labour market status with  
9 employment reducing the likelihood of reporting poor health [28]. Coupled to the health damaging  
10 psychological and material consequences of non-work [29] this may allow us to understand why economic  
11 inactivity may be associated with a higher risk of poor general health at the individual level.

12  
13  
14  
15  
16  
17  
18  
19  
20  
21 Of course, confounding is a real possibility within this repeated cross-sectional study. For example, there could  
22 be other confounding or mediating trends that are associated with both general health and employment that  
23 could explain the impact of adjusting for changes in employment status. Examples include the apparent  
24 decline in job quality over time [30] and macro-economic changes such as the rise in the level of income  
25 inequality.

26  
27  
28  
29  
30  
31  
32  
33  
34  
35  
36  
37  
38  
39  
40  
41  
42  
43  
44  
45  
46  
47  
48  
49  
50  
51  
52  
53  
54  
55  
56  
57  
58  
59  
60  
Economic inactivity is also a potentially important influence on population health, not just because of the  
composition of the inactive population itself, but also because it is generally a longer term state. For example,  
a recent cohort study of people out of work and in receipt of incapacity-related benefits in the UK found that  
the average length of economic inactivity amongst this group was nine years [31]. Thus the issues which are  
usually put forward to explain the association between unemployment and ill health – most notably poverty,  
social exclusion and low social status – are thus experienced for a much longer time period by those who are  
inactive than by those who are unemployed.

Whilst our results suggest that decreasing the numbers of economically inactive could have health benefits,  
this is by no means an easy task and not just because of the current economic climate. Research into welfare  
to work interventions for those with a disability or chronic illness has found that even in times of solid  
economic growth it is very difficult to increase the employment rate of this group. For example, in the UK since  
the 1990s there have been increasing efforts to enhance the labour market participation of this group using  
various interventions including education, training and work placement schemes; vocational advice and

1  
2  
3 support services; vocational rehabilitation; in-work benefits; financial incentives for employers; employment  
4 rights legislation and accessibility interventions[4]. However, the evidence of effectiveness in terms of actually  
5 increasing employment is very limited [4, 32-34]. This is partly attributed to the largely supply-side orientation  
6 of most of the interventions [4], the focus on employment rather than health improvement [31, 35] and the  
7 lack of demand from employers for workers with complicated and fluctuating health conditions [31].  
8  
9

10  
11 In addition to being only cross-sectional, another limitation of using the General Household Survey is that  
12 response rate fell over time; weighting was introduced in 2000 and we have applied this in all analysis but the  
13 possibility remains that the survey became increasingly unrepresentative over time. It is impossible to assess  
14 the impact of this on our results as we do not have details of non responders. However, evidence comparing a  
15 national census to a national health survey suggested that low socio-economic groups and the out of work  
16 were less well represented in the survey leading to a more conservative estimate of the social gradient in  
17 health in the survey [36].  
18  
19  
20  
21  
22  
23  
24  
25  
26  
27

## 28 **Conclusion**

29  
30 To summarise, this study shows that poor health may have worsened amongst both men and women from  
31 1978 to 2004 when accounting for socio-economic changes. However, controlling for the employment status  
32 changes in the UK since 1978 attenuated the increase in poor general health. This research raises important  
33 public policy issues around the role of employment in overall public health which should be examined further.  
34  
35  
36  
37

## 38 **Acknowledgements**

39  
40 General Household Survey Time Series Dataset 1972-2004 was created by the Office for National Statistics. The  
41 user guide for the time series dataset was created jointly by ONS and the Economic and Social Data Service  
42 (ESDS) Government and downloaded from the UK Data Archive. The data are Crown copyright. The authors  
43 alone are responsible for the analysis and interpretation.  
44  
45  
46  
47

## 48 **Funding**

49  
50 No specific grant was associated with this was work. LG (5TK30) and FP (5TK10) are funded by the MRC  
51  
52

## 53 **Ethics approval**

54  
55 Not required for this secondary analysis of publically available and anonymised secondary data  
56  
57  
58  
59  
60

### Author contributions

FP had the original idea which was developed with CB. FP and LG conducted the analysis. FP drafted the manuscript with revisions from CB and LG.

### References

- 1 Dorling D, Rees P. A nation still dividing: the British census and social polarisation 1971 - 2001. *Environ Plan A* 2003;**35**:1287-313.
- 2 Thomas B, Dorling D, Davey Smith G. Inequalities in premature mortality in Britain: observational study from 1921 to 2007. *BMJ* 2010;**341**:c3639.
- 3 Eikemo TA, Bambra C. The welfare state: a glossary for public health. *J Epidemiol Community Health* 2008;**62**:3-6.
- 4 Bambra C. *Work, Worklessness, and the Political Economy of Health*. Oxford: Oxford University Press 2011.
- 5 Beatty C. A Theory of Employment, Unemployment and Sickness. *Reg Stud* 2000;**34**:617-30.
- 6 Roelfs DJ, Shor E, Davidson KW, et al. Losing life and livelihood: A systematic review and meta-analysis of unemployment and all-cause mortality. *Soc Sci Med* 2011;**72**:840-54.
- 7 Paul KI, Moser K. Unemployment impairs mental health: Meta-analyses. *J Vocat Behav* 2009;**74**:264-82.
- 8 Welch SS. A review of the literature on the epidemiology of parasuicide in the general population. *Psychiatr Serv* 2001;**52**:368.
- 9 Blanchflower D, Oswald A. International Happiness. *The Academy of Management Perspectives (formerly The Academy of Management Executive) (AMP)* 2011;**25**:6-22.
- 10 Bambra C, Popham F. Worklessness and regional differences in the social gradient in general health: Evidence from the 2001 English census. *Health Place* 2010;**16**:1014-21.
- 11 Bartley M, Plewis I. Accumulated labour market disadvantage and limiting long-term illness: data from the 1971-1991 Office for National Statistics' Longitudinal Study. *Int J Epidemiol* 2002;**31**:336-41.
- 12 Korpi T. Accumulating Disadvantage. Longitudinal Analyses of Unemployment and Physical Health in Representative Samples of the Swedish Population. *European Sociological Review* 2001;**17**:255-73.
- 13 Clemens T, Boyle P, Popham F. Unemployment, mortality and the problem of health-related selection: evidence from the Scottish and England & Wales (ONS) longitudinal studies. *Health Stat Q* 2009:7-13.
- 14 Popham F, Bambra C. Evidence from the 2001 English Census on the contribution of employment status to the social gradient in self-rated health. *J Epidemiol Community Health* 2010;**64**:277-80.
- 15 MacKay RR, Davies L. Unemployment, permanent sickness, and nonwork in the United Kingdom. *Environ Plan A* 2007;**40**:464-81.
- 16 User Guide for the General Household Survey (GHS) Time Series Dataset 1972 to 2004 (suitable for pseudo-cohort analysis). [http://www.esds.ac.uk/doc/5664%5Cmrdoc%5Cpdf%5C5664\\_ghs\\_time\\_series\\_user\\_guide.pdf](http://www.esds.ac.uk/doc/5664%5Cmrdoc%5Cpdf%5C5664_ghs_time_series_user_guide.pdf)
- 17 Macintyre S, McKay L, Der G, et al. Socio-economic position and health: what you observe depends on how you measure it. *J Public Health* 2003;**25**:288-94.
- 18 Mood C. Logistic Regression: Why We Cannot Do What We Think We Can Do, and What We Can Do About It. *Eur Sociol Rev* 2010;**26**:67-82.
- 19 Powers DA, Yoshioka H, Yun MS. mvdcmp: Multivariate decomposition for nonlinear response models. *Stata Journal* 2011;**11**:556.
- 20 Ki M, Sacker A, Kelly Y, et al. Health selection operating between classes and across employment statuses. *J Epidemiol Community Health* 2011;**65**:1132-9.
- 21 Sacker A, Wiggins RD, Bartley M, et al. Self-Rated Health Trajectories in the United States and the United Kingdom: A Comparative Study. *Am J Public Health* 2007;**97**:812-8.
- 22 Bartley M, Owen C. Relation between socioeconomic status, employment, and health during economic change, 1973-93. *BMJ* 1996;**313**:445-9.
- 23 Minton JW, Pickett KE, Dorling D. Health, employment, and economic change, 1973-2009: repeated cross sectional study. *BMJ* 2012;**344**.
- 24 Holland P, Burström B, Whitehead M, et al. How Do Macro-Level Contexts and Policies Affect the Employment Chances of Chronically Ill and Disabled People? Part I: The Impact of Recession and Deindustrialization. *Int J Health Serv* 2011;**41**:395-413.

- 1  
2  
3 25 Holland P, Nylén L, Thielen K, *et al.* How Do Macro-Level Contexts and Policies Affect the Employment  
4 Chances of Chronically Ill and Disabled People? Part II: The Impact of Active and Passive Labor Market Policies.  
5 *Int J Health Serv* 2011;**41**:415-30.
- 6 26 Beatty C, Fothergill S, Houston D, *et al.* A gendered theory of employment, unemployment, and  
7 sickness. *Environ Plan C* 2009;**27**:958-74.
- 8 27 Jylhä M. What is self-rated health and why does it predict mortality? Towards a unified conceptual  
9 model. *Soc Sci Med* 2009;**69**:307-16.
- 10 28 Bartley M, Sacker A, Clarke P. Employment status, employment conditions, and limiting illness:  
11 prospective evidence from the British household panel survey 1991-2001. *J Epidemiol Community Health*  
12 2004;**58**:501-6.
- 13 29 Bartley M, Ferrie J, Montgomery SM. Health and labour market disadvantage: unemployment, non-  
14 employment, and job insecurity. In: Marmot M, Wilkinson RG, eds. *Social determinants of health*. Oxford:  
15 Oxford University Press 2006:78-96.
- 16 30 Clark AE. Your Money or Your Life: Changing Job Quality in OECD Countries. *Br J Ind Relat*  
17 2005;**43**:377-400.
- 18 31 Warren J, Garthwaite K, Bamba C. 'A health problem? Health and employability in the UK labour  
19 market'. In: Houston D, Lindsay C, eds. *Disability Benefits and Employment Policy: Fit for Work? Fit for Purpose?*  
20 London: Palgrave in press.
- 21 32 Clayton S, Bamba C, Gosling R, *et al.* Assembling the evidence jigsaw: insights from a systematic  
22 review of UK studies of individual-focused return to work initiatives for disabled and long-term ill people. *BMC*  
23 *Public Health* 2011;**11**:170.
- 24 33 Bamba C, Whitehead M, Hamilton V. Does 'welfare-to-work' work? A systematic review of the  
25 effectiveness of the UK's welfare-to-work programmes for people with a disability or chronic illness. *Soc Sci*  
26 *Med* 2005;**60**:1905-18.
- 27 34 Barr B, Clayton S, Whitehead M, *et al.* To what extent have relaxed eligibility requirements and  
28 increased generosity of disability benefits acted as disincentives for employment? A systematic review of  
29 evidence from countries with well-developed welfare systems. *J Epidemiol Community Health* 2010;**64**:1106-  
30 14.
- 31 35 Bamba C. Doctors are key to welfare reform. *BMJ* 2010;**341**.
- 32 36 Lorant V, Demarest S, Miermans PJ, *et al.* Survey error in measuring socio-economic risk factors of  
33 health status: a comparison of a survey and a census. *Int J Epidemiol* 2007;**36**:1292-9.
- 34  
35  
36  
37  
38  
39  
40  
41  
42  
43  
44  
45  
46  
47  
48  
49  
50  
51  
52  
53  
54  
55  
56  
57  
58  
59  
60

1  
2  
3 Figure 1 Prevalence of housing tenure types, car access and degree attainment 1978 to 2004 for men and  
4 women aged 25 to 59  
5  
6

7 Figure 2 Prevalence of the different types of employment status 1978 to 2004 from men and women aged 25  
8 to 59  
9

10  
11 **Figure 3 Prevalence difference in poor health from 1978 (reference) to 2004 for men from model A (age  
12 adjusted), model B (plus adjustment for socio-economic characteristics) and model C (plus adjustment for  
13 employment status).**  
14

15  
16 **Figure 4 Prevalence difference in poor health from 1978 (reference) to 2004 for women from model A (age  
17 adjusted), model B (plus adjustment for socio-economic characteristics) and model C (plus adjustment for  
18 employment status).**  
19  
20  
21  
22  
23  
24  
25  
26  
27  
28  
29  
30  
31  
32  
33  
34  
35  
36  
37  
38  
39  
40  
41  
42  
43  
44  
45  
46  
47  
48  
49  
50  
51  
52  
53  
54  
55  
56  
57  
58  
59  
60

1  
2  
3  
4  
5  
6  
7  
8  
9  
10  
11  
12  
13  
14  
15  
16  
17  
18  
19  
20  
21  
22  
23  
24  
25  
26  
27  
28  
29  
30  
31  
32  
33  
34  
35  
36  
37  
38  
39  
40  
41  
42  
43  
44  
45  
46  
47  
48  
49  
50  
51  
52  
53  
54  
55  
56  
57  
58  
59  
60



Figure 1 Prevalence of housing tenure types, car access and degree attainment 1978 to 2004 for men and women aged 25 to 59  
101x73mm (300 x 300 DPI)

Review only



Figure 2 Prevalence of the different types of employment status 1978 to 2004 from men and women aged 25 to 59  
101x73mm (300 x 300 DPI)

For peer review only

1  
2  
3  
4  
5  
6  
7  
8  
9  
10  
11  
12  
13  
14  
15  
16  
17  
18  
19  
20  
21  
22  
23  
24  
25  
26  
27  
28  
29  
30  
31  
32  
33  
34  
35  
36  
37  
38  
39  
40  
41  
42  
43  
44  
45  
46  
47  
48  
49  
50  
51  
52  
53  
54  
55  
56  
57  
58  
59  
60



Figure 3 Prevalence difference in poor health from 1978 (reference) to 2004 for men from model A (age adjusted), model B (plus adjustment for socio-economic characteristics) and model C (plus adjustment for employment status).  
101x73mm (300 x 300 DPI)

ew only



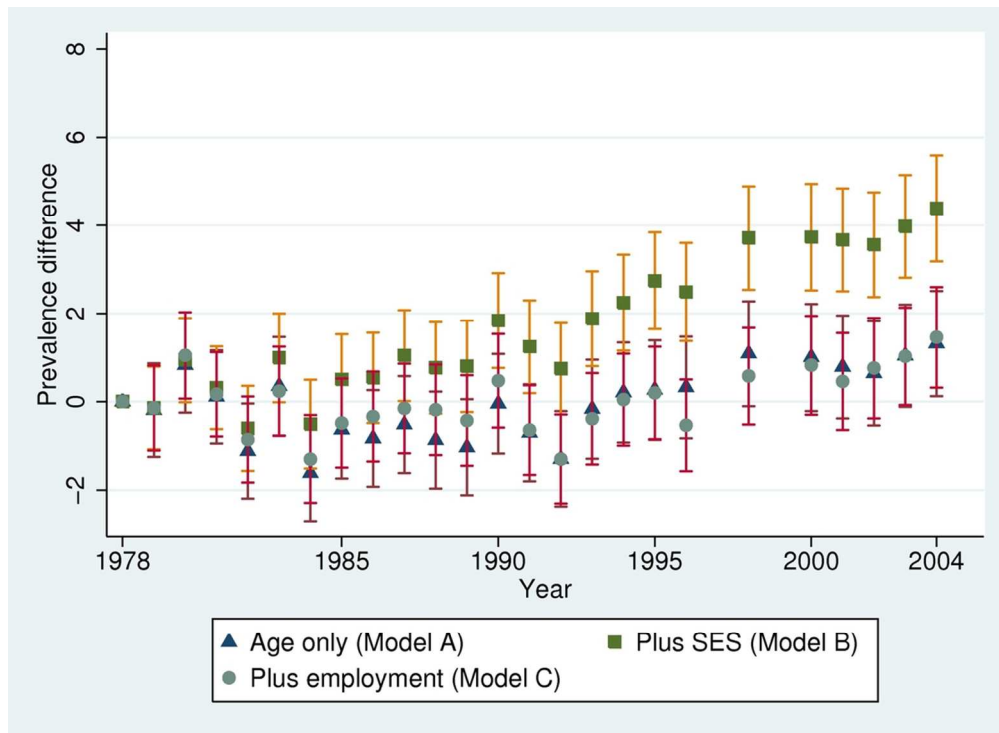

Figure 4 Prevalence difference in poor health from 1978 (reference) to 2004 for women from model A (age adjusted), model B (plus adjustment for socio-economic characteristics) and model C (plus adjustment for employment status).  
101x73mm (300 x 300 DPI)

ew only

Multiple imputation results

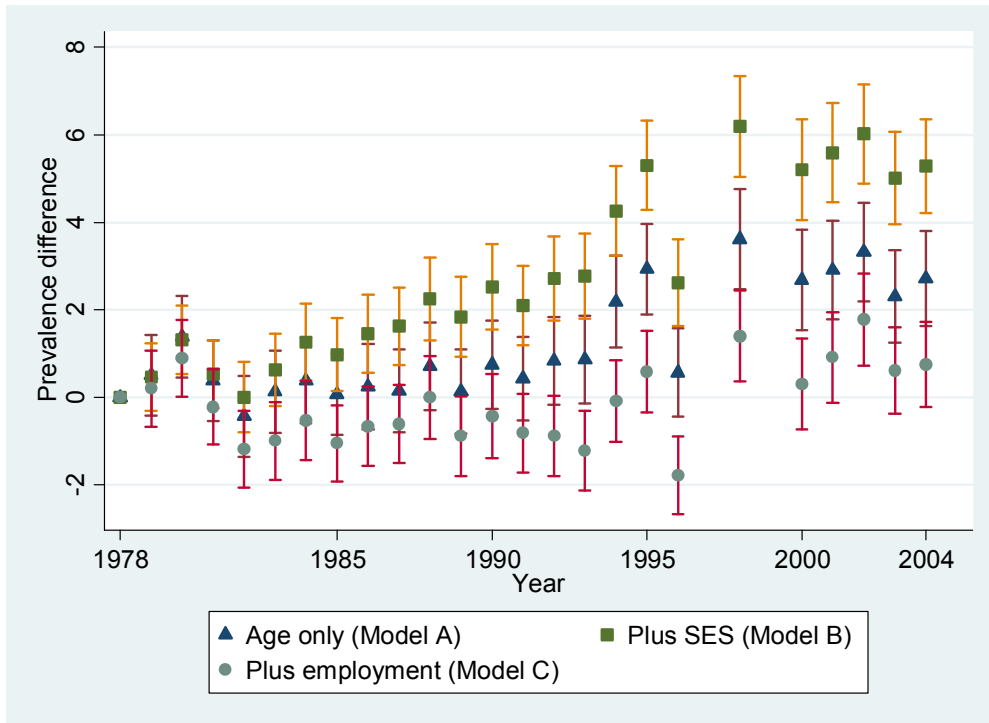

Supplemental figure 1 Prevalence difference in poor health from 1978 (reference) to 2004 for men from model A (age adjusted), model B (plus adjustment for socio-economic characteristics) and model C (plus adjustment for employment status).

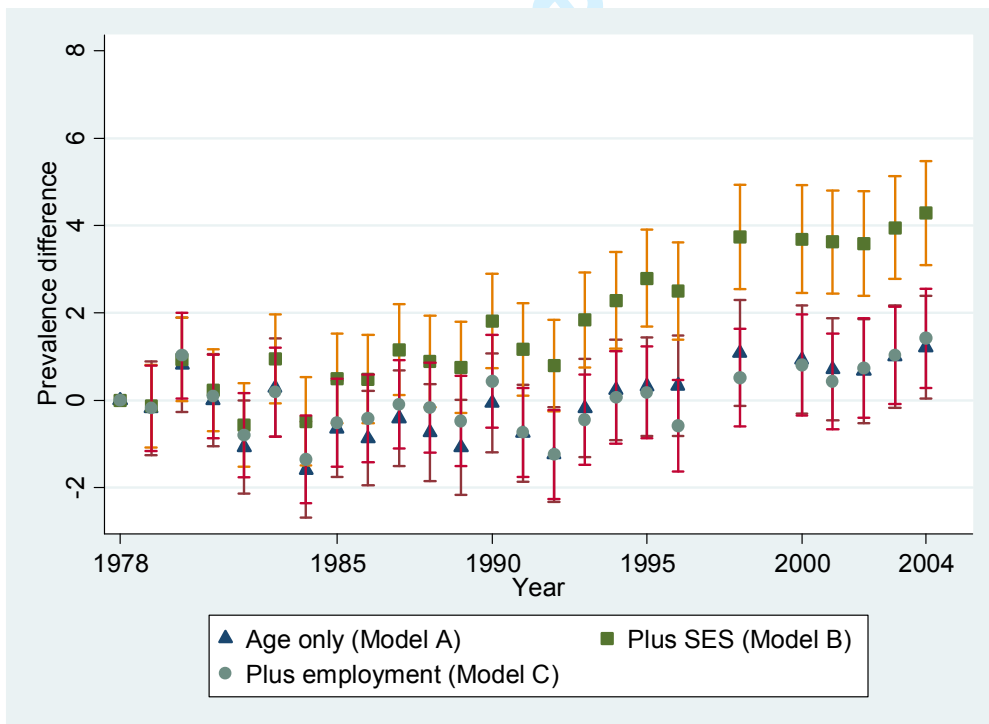

Supplemental figure 2 Prevalence difference in poor health from 1978 (reference) to 2004 for men from model A (age adjusted), model B (plus adjustment for socio-economic characteristics) and model C (plus adjustment for employment status).

Multilevel model results



**Supplemental figure 3. Results (on logs odds scale) from multilevel model for men treating year as a random intercept. Estimated annual difference compared to average of all years (0) . For comparison to main results red line indicates 1978. Panel A is model A (adjusted for age only), panel B is model B (plus adjustment for socio-economic characteristics), panel C is model C (plus adjustment for employment status), panel D is model C plus allowing employment status to vary across years.**

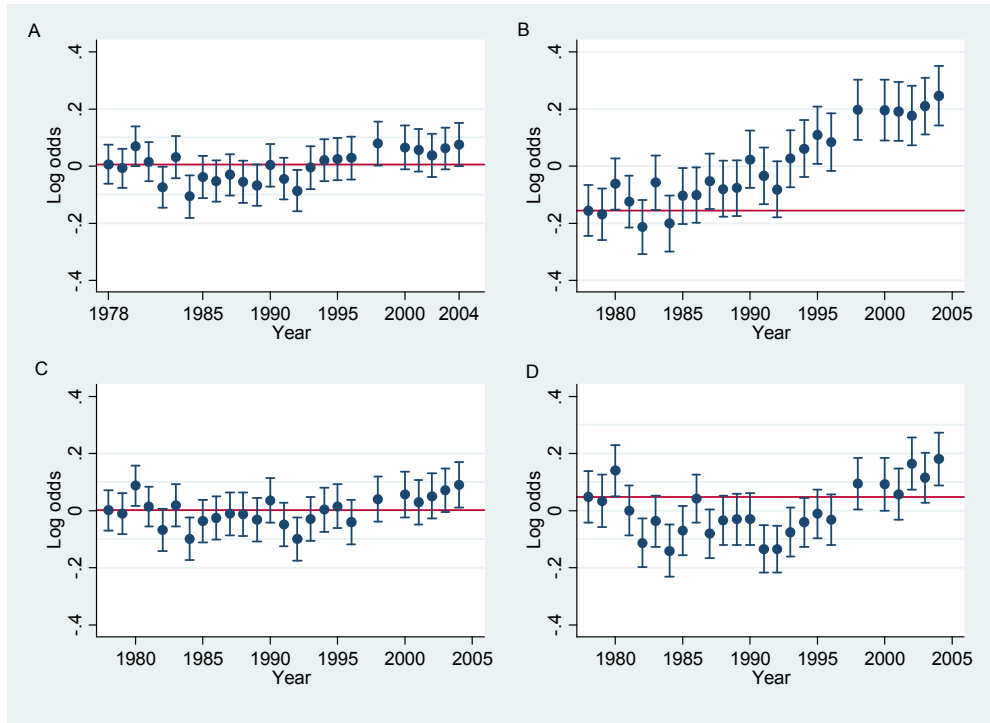

**Supplemental figure 4. Results (on logs odds scale) from multilevel models for women treating year as a random intercept. Estimated annual difference compared to average of all years (0) . For comparison to main results red line indicates 1978. Panel A is model A (adjusted for age only), panel B is model B (plus adjustment for socio-economic characteristics) panel C is model C (plus adjustment for employment status), panel D is model C plus allowing employment status to vary across years.**
